# Supplementary material for: Structure determination of difficult-to-crystallize organic molecules by co-crystallization of a phosphorylated macrocycle
Source: Royal Society of Chemistry journal article supplement (doi:10.1039/d4qo01498g), 2024-01-01
Supplement: d4qo01498g1.pdf [file d4qo01498g1.pdf]

## Supporting Information for

# **Structure Determination of Difficult-to-Crystallize Organic Molecules by Co-Crystallization of Phosphorylated Macrocycle**

Heng Li,<sup>1</sup> Zhijin Li,<sup>1</sup> Chen Lin,<sup>1\*</sup> Juli Jiang,<sup>1\*</sup> Leyong Wang

<sup>1</sup> State Key Laboratory of Analytical Chemistry for Life Science, Jiangsu Key Laboratory of Advanced Organic Materials, School of Chemistry and Chemical Engineering, Nanjing University, Nanjing, 210023, China

# Table of Contents

|                                                                                 |     |
|---------------------------------------------------------------------------------|-----|
| 1. Supplementary Methods .....                                                  | 3   |
| 2. General Protocol for Co-Crystallization Experiment.....                      | 5   |
| 3. Supplementary Tables .....                                                   | 6   |
| 4. Crystallographic data .....                                                  | 10  |
| 5. Co-crystal analysis of <b>F[3]A1-[P(O)Ph]<sub>3</sub></b> and G36-G37 .....  | 48  |
| 5.1 Co-crystal of 18-crown-6 (G36) and <b>F[3]A1-[P(O)Ph]<sub>3</sub></b> ..... | 48  |
| 5.2 Co-crystal of dithianon (G37) and <b>F[3]A1-[P(O)Ph]<sub>3</sub></b> .....  | 50  |
| 6. The 2D Hirshfeld fingerprint plots.....                                      | 52  |
| 7. DFT-calculated <b>ESP</b> surfaces of all guests .....                       | 89  |
| 8. Structural breadth of the chaperone effect.....                              | 100 |
| 9. Details of <b>DFT</b> calculations .....                                     | 101 |
| 10. References.....                                                             | 126 |

# 1. Supplementary Methods

All reactions were performed in an air atmosphere unless otherwise stated. Deuterium solvents were purchased from Aldrich. All other reagents were obtained from commercial sources and were used without further purification unless indicated otherwise. All yields were given as isolated yields.  $^1\text{H}$  NMR and  $^{13}\text{C}$  NMR spectra were recorded on a **BRUKER AVANCE III 400 MHz**, and the chemical shifts ( $\delta$ ) for  $^1\text{H}$  NMR spectra, given in ppm, are referenced to the residual proton signal of the deuterated solvent. Diffraction data were collected on an **X-ray** single crystal diffractometer at **Bruker AXS GmbH**, Germany, at 193 K using **Cu K $\alpha$**  ( $\lambda = 1.54178 \text{ \AA}$ ). Cell refinement and data reduction were performed with the **SAINT** program package. Absorption correction was performed with **SADBAS**. Structures were solved by direct methods using **OLEX 2** <sup>[1]</sup>. After obtaining the initial structure for refinement using the standard **SHELXT** program by using the **OLEX 2** software, the refinement of the main frame should be performed first. After anisotropic refinement of all non-H atoms in the framework, the positions of the **H** atoms were calculated geometrically with riding models. If there is a disorder in the molecule, the **PART** command is used to change the part number/occupancy for the given/selected atom; The **DELU** command restrains the **ADPs** of the atoms in the direction of the bond between them to be equal within the given standard uncertainty; The **SIMU** constraint command was used to make the atomic displacement parameters of selected bonds or atom pairs within the given atoms similar with the given estimated standard deviation. Some crystal structures have completely disordered dichloromethane solvent molecules and the **SQUEEZE** method was used to further refine the data. The crystallographic data reported have been deposited with the **Cambridge Crystallographic Data Centre (CCDC)**. The graphics of crystal structures were generated with the programs **Mercury 2020.1** and **VMD 1.9.3**. The **B3LYP** <sup>[2]</sup> density functional

method with the **D3(BJ)** <sup>[3]</sup> dispersion correction was employed in this work to carry out all the computations. The **6-31G(d)** <sup>[2]</sup> basis set was used for the atoms in geometry optimizations using the **PCM** model with dichloroethane as the solvent. Vibrational frequency analyses at the same level of theory were performed to characterize stationary points as local minima without any imaginary frequencies. All **DFT** theoretical calculations have been carried out using the Gaussian program package.

## 2. General Protocol for Co-Crystallization Experiment

### (1). General Protocol for Co-Crystallization Experiment:

The detailed synthetic procedure for **F[3]A1-[P(O)Ph]<sub>3</sub>** is described in previous work. <sup>[4,5]</sup> The following is the general procedure for co-crystallization experiments of the host macrocyclic **F[3]A1-[P(O)Ph]<sub>3</sub>** and a guest molecule by solvent volatilization, where the guest molecule is exemplified by 4-fluoroaniline (**G9**). A solid **F[3]A1-[P(O)Ph]<sub>3</sub>** samples (2 mg, 0.002 mmol) was placed in a 3 mL heat-resistant glass vial, and the liquid guest molecule 4-fluoroaniline (35  $\mu$ L, 0.36 mmol) was added to a solution of 25  $\mu$ L dichloromethane and 25  $\mu$ L dichloroethane and sonicated to dissolve the sample until a completely clear solution was formed. The solvent was slowly evaporated and co-crystals were obtained after 48 hours. Suitable crystals were selected, collected, and analyzed by X-ray diffraction. Details of the co-crystallization of all guest molecules with the host macrocyclic **F[3]A1-[P(O)Ph]<sub>3</sub>** are given in **Table S1**.

### (2). General Protocol for Thermal Co-Crystallization <sup>5</sup>

The following is the general protocol of the thermal co-crystallization experiment, where the guest molecule is exemplified by 4-chlorophenol (**G17**). A solid **F[3]A1-[P(O)Ph]<sub>3</sub>** samples (2 mg, 0.002 mmol) was placed in a 3 mL heat-resistant glass vial and 50  $\mu$ L of liquid analyte 4-chlorophenol (65 mg, 0.510 mmol) was added. The resulting suspension was briefly heated on a heated stirrer or hot plate until a clear solution was formed. The temperature of the hot plate is adjusted to the boiling point of the analyte or up to 80°C. The temperature of the hot plate is then adjusted and cooled to room temperature at a rate of 1 °C /h. <sup>[6]</sup> Suitable crystals are selected, collected, and analyzed by X-ray diffraction. Details of the crystallization run of the analytes are given in **Table S1**.

### 3. Supplementary Tables

**Table S1.** Typical amounts of F[3]A1-[P(O)Ph]<sub>3</sub>, liquid guest and solvent, as used for the crystallization experiments of **Figure 2**.

| Chaperone                    | [mg] | Entry No.  | Analyte <sup>3</sup>     | [μL] | solvent     | [μL] |
|------------------------------|------|------------|--------------------------|------|-------------|------|
| F[3]A1-[P(O)Ph] <sub>3</sub> | 2 mg | <b>G1</b>  | Acetonitrile             | 50   | —           | —    |
| F[3]A1-[P(O)Ph] <sub>3</sub> | 2 mg | <b>G2</b>  | 3-Buten-1-ol             | 50   | DCM/EDC=1:1 | 50   |
| F[3]A1-[P(O)Ph] <sub>3</sub> | 2 mg | <b>G3</b>  | Dichloroethane           | 55   | —           | —    |
| F[3]A1-[P(O)Ph] <sub>3</sub> | 2 mg | <b>G4</b>  | Phenylacetylene          | 45   | DCM/EDC=1:1 | 50   |
| F[3]A1-[P(O)Ph] <sub>3</sub> | 2 mg | <b>G5</b>  | Ethylbenzene             | 50   | DCM/EDC=1:1 | 50   |
| F[3]A1-[P(O)Ph] <sub>3</sub> | 2 mg | <b>G6</b>  | 4-Pyridinecarboxaldehyde | 50   | DCM/EDC=1:1 | 50   |
| F[3]A1-[P(O)Ph] <sub>3</sub> | 2 mg | <b>G7</b>  | N-Methylaniline          | 50   | DCM/EDC=1:1 | 50   |
| F[3]A1-[P(O)Ph] <sub>3</sub> | 2 mg | <b>G8</b>  | 2-Chloropropionic acid   | 45   | DCM/EDC=1:1 | 50   |
| F[3]A1-[P(O)Ph] <sub>3</sub> | 2 mg | <b>G9</b>  | 4-Fluoroaniline          | 35   | DCM/EDC=1:1 | 50   |
| F[3]A1-[P(O)Ph] <sub>3</sub> | 2 mg | <b>G10</b> | 4-Fluorophenylacetylene  | 40   | DCM/EDC=1:1 | 50   |
| F[3]A1-[P(O)Ph] <sub>3</sub> | 2 mg | <b>G11</b> | 3-Methylbenzylamine      | 40   | DCM/EDC=1:1 | 50   |
| F[3]A1-[P(O)Ph] <sub>3</sub> | 2 mg | <b>G12</b> | 3-methylbenzyl alcohol   | 40   | DCM/EDC=1:1 | 50   |
| F[3]A1-[P(O)Ph] <sub>3</sub> | 2 mg | <b>G13</b> | Phenethyl alcohol        | 45   | DCM/EDC=1:1 | 50   |
| F[3]A1-[P(O)Ph] <sub>3</sub> | 2 mg | <b>G14</b> | 3-Methoxyaniline         | 40   | DCM/EDC=1:1 | 50   |
| F[3]A1-[P(O)Ph] <sub>3</sub> | 2 mg | <b>G15</b> | 3-Fluorobenzoic acid     | 45   | DCM/EDC=1:1 | 50   |
| F[3]A1-[P(O)Ph] <sub>3</sub> | 2 mg | <b>G16</b> | <i>p</i> -Cresol         | 50   | DCM/EDC=1:1 | 50   |
| F[3]A1-[P(O)Ph] <sub>3</sub> | 2 mg | <b>G17</b> | 4-Chlorophenol           | 50   | —           | —    |
| F[3]A1-[P(O)Ph] <sub>3</sub> | 2 mg | <b>G18</b> | 3-Phenylprop-2-enal      | 45   | DCM/EDC=1:1 | 50   |
| F[3]A1-[P(O)Ph] <sub>3</sub> | 2 mg | <b>G19</b> | 4-(prop-2-ynyl)phenol    | 35   | DCM/EDC=1:1 | 50   |

|                              |      |     |                                    |      |               |    |
|------------------------------|------|-----|------------------------------------|------|---------------|----|
| F[3]A1-[P(O)Ph] <sub>3</sub> | 2 mg | G20 | 2-(p-Methylphenyl)propene          | 35   | DCM/EDC=1:1   | 50 |
| F[3]A1-[P(O)Ph] <sub>3</sub> | 2 mg | G21 | 4-Fluoroacetophenone               | 45   | DCM/EDC=1:1   | 50 |
| F[3]A1-[P(O)Ph] <sub>3</sub> | 2 mg | G22 | Bromoacetic acid                   | 40   | DCM/EDC=1:1   | 50 |
| F[3]A1-[P(O)Ph] <sub>3</sub> | 2 mg | G23 | 4-Fluorophenethyl alcohol          | 50   | DCM/EDC=1:1   | 50 |
| F[3]A1-[P(O)Ph] <sub>3</sub> | 2 mg | G24 | 1-Methylnaphthalene                | 50   | DCM/EDC=1:1   | 50 |
| F[3]A1-[P(O)Ph] <sub>3</sub> | 2 mg | G25 | 4'-Methylpropiophenone             | 45   | DCM/EDC=1:1   | 50 |
| F[3]A1-[P(O)Ph] <sub>3</sub> | 2 mg | G26 | 2-Chloro-4-methylbenzaldehyde      | 40   | DCM/EDC=1:1   | 50 |
| F[3]A1-[P(O)Ph] <sub>3</sub> | 2 mg | G27 | 3-Chlorophenethyl alcohol          | 60   | —             | —  |
| F[3]A1-[P(O)Ph] <sub>3</sub> | 2 mg | G28 | 3-Chloroacetophenone               | 50   | —             | —  |
| F[3]A1-[P(O)Ph] <sub>3</sub> | 2 mg | G29 | 4-Chloro-3-fluorobenzylamine       | 50   | —             | —  |
| F[3]A1-[P(O)Ph] <sub>3</sub> | 2 mg | G30 | 4-Chloro-3-fluoroanisole           | 40   | —             | —  |
| F[3]A1-[P(O)Ph] <sub>3</sub> | 2 mg | G31 | 4-(Trifluoromethyl)phenylacetylene | 55   | DCM/EDC=1:1   | 50 |
| F[3]A1-[P(O)Ph] <sub>3</sub> | 2 mg | G32 | 4-(Trifluoromethyl)benzyl alcohol  | 45   | DCM/EDC=1:1   | 50 |
| F[3]A1-[P(O)Ph] <sub>3</sub> | 2 mg | G33 | 4-Bromobenzaldehyde                | 50   | —             | —  |
| F[3]A1-[P(O)Ph] <sub>3</sub> | 2 mg | G34 | 4-Bromoethylbenzene                | 45   | —             | —  |
| F[3]A1-[P(O)Ph] <sub>3</sub> | 2 mg | G35 | Ethylferrocene                     | 50   | DCM/EDC=1:1   | 50 |
| F[3]A1-[P(O)Ph] <sub>3</sub> | 2 mg | G36 | 18-Crown-6                         | 35   | Chlorobenzene | 50 |
| F[3]A1-[P(O)Ph] <sub>3</sub> | 2 mg | G37 | Dithianon                          | 4 mg | Chlorobenzene | 60 |
| F[3]A1-[P(O)Ph] <sub>3</sub> | 2 mg | G38 | muscone                            | 50   | DCM/EDC=1:1   | 50 |
| F[3]A1-[P(O)Ph] <sub>3</sub> | 2 mg | G39 | farnesol                           | 55   | DCM/EDC=1:1   | 50 |
| F[3]A1-[P(O)Ph] <sub>3</sub> | 2 mg | G40 | a-humulene                         | 60   | DCM/EDC=1:1   | 50 |
| F[3]A1-[P(O)Ph] <sub>3</sub> | 2 mg | G41 | geranyl acetate                    | 60   | DCM/EDC=1:1   | 50 |
| F[3]A1-[P(O)Ph] <sub>3</sub> | 2 mg | G42 | L-erythrose                        | 45   | DCM/EDC=1:1   | 50 |
| F[3]A1-[P(O)Ph] <sub>3</sub> | 2 mg | G43 | all-trans-retinol                  | 65   | DCM/EDC=1:1   | 50 |
| F[3]A1-[P(O)Ph] <sub>3</sub> | 2 mg | G44 | phytol                             | 70   | DCM/EDC=1:1   | 50 |

**Table S2.** Data details of relative molecular mass and **Log P** of guest molecules in co-crystallisation experiments and **CCDC** numbers.

| Entry No. | Analyte                            | Molecular weight [g/mol] | Log P  | CCDC entry numbers <sup>a</sup> |
|-----------|------------------------------------|--------------------------|--------|---------------------------------|
| G1        | Acetonitrile                       | 41.05                    | -0.34  | 2330011                         |
| G2        | 3-Buten-1-ol                       | 72.11                    | 0.03   | 2356284                         |
| G3        | Dichloroethane                     | 98.96                    | 1.45   | 2330015                         |
| G4        | Phenylacetylene                    | 102.13                   | 2.34   | 2330006                         |
| G5        | Ethylbenzene                       | 106.17                   | 3.03   | 2330014                         |
| G6        | 4-Pyridinecarboxaldehyde           | 107.11                   | 0.435  | 2330017                         |
| G7        | N-Methylaniline                    | 107.15                   | 1.7    | 2330018                         |
| G8        | 2-Chloropropionic acid             | 108.52                   | 0.82   | 2330020                         |
| G9        | 4-Fluoroaniline                    | 111.12                   | 1.15   | 2330007                         |
| G10       | 4-Fluorophenylacetylene            | 120.12                   | 2.72   | 2356642                         |
| G11       | 3-Methylbenzylamine                | 121.18                   | 1.52   | 2330012                         |
| G12       | 3-methylbenzyl alcohol             | 122.16                   | 1.6    | 2330010                         |
| G13       | Phenethyl alcohol                  | 122.16                   | 1.36   | 2330019                         |
| G14       | 3-Methoxyaniline                   | 123.15                   | 0.93   | 2330016                         |
| G15       | 3-Fluorobenzoic acid               | 124.11                   | 1.42   | 2330009                         |
| G16       | <i>p</i> -Cresol                   | 124.14                   | 1.41   | 2330077                         |
| G17       | 4-Chlorophenol                     | 128.56                   | 2.39   | 2330080                         |
| G18       | 3-Phenylprop-2-enal                | 132.16                   | 1.9    | 2330073                         |
| G19       | 4-(2-Propyn-1-yl)phenol            | 132.16                   | 2.7    | 2356657                         |
| G20       | 2-( <i>p</i> -Methylphenyl)propene | 136.17                   | 1.17   | 2330066                         |
| G21       | 4-Fluoroacetophenone               | 138.14                   | 1.64   | 2330078                         |
| G22       | Bromoacetic acid                   | 138.95                   | 1.53   | 2356658                         |
| G23       | 4-Fluorophenethyl alcohol          | 140.15                   | 1.49   | 2356643                         |
| G24       | 1-Methylnaphthalene                | 142.2                    | 3.87   | 2330068                         |
| G25       | 4'-Methylpropiophenone             | 148.2                    | 2.51   | 2330060                         |
| G26       | 2-Chloro-4-methylbenzaldehyde      | 154.59                   | 2.625  | 2330075                         |
| G27       | 3-Chlorophenethyl alcohol          | 154.59                   | 1.55   | 2356645                         |
| G28       | 3-Chloroacetophenone               | 154.59                   | 1.68   | 2330076                         |
| G29       | 4-Chloro-3-fluorobenzylamine       | 159.59                   | 1.82   | 2359297                         |
| G30       | 4-Chloro-3-fluoroanisole           | 160.57                   | 2.79   | 2356646                         |
| G31       | 4-(Trifluoromethyl)phenylacetylene | 170.13                   | 2.59   | 2330072                         |
| G32       | 4-(Trifluoromethyl)benzyl alcohol  | 176.14                   | 1.97   | 2330059                         |
| G33       | 4-Bromobenzaldehyde                | 185.02                   | 2.46   | 2356659                         |
| G34       | 4-Bromoethylbenzene                | 185.06                   | 3.82   | 2356654                         |
| G35       | Ethylferrocene                     | 214.08                   | 3.71   | 2330061                         |
| G36       | 18-Crown-6                         | 264.32                   | -0.831 | 2330062                         |
| G37       | Dithianon                          | 296.32                   | 2.23   | 2356656                         |
| G38       | muscone                            | 238.4                    | 6.06   | —                               |
| G39       | farnesol                           | 222.37                   | 4.8    | —                               |
| G40       | a-humulene                         | 204                      | 6.3    | —                               |



|            |                   |        |      |   |
|------------|-------------------|--------|------|---|
| <b>G41</b> | geranyl acetate   | 196.29 | 4.17 | — |
| <b>G42</b> | L-erythrulose     | 286.45 | 5.68 | — |
| <b>G43</b> | all-trans-retinol | 296.53 | 9.83 | — |
| <b>G44</b> | phytol            | 238.4  | 6.06 | — |

---

a) CCDC entry numbers are given for runs that were successful and led to a high-resolution structure.

## 4. Crystallographic data

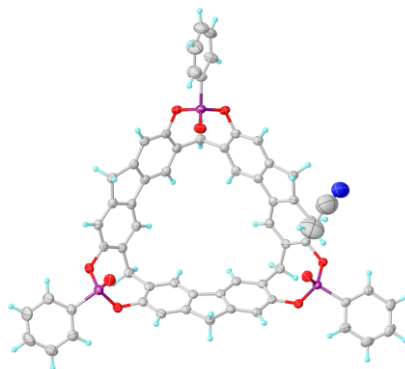

**Figure S1.** X-ray crystal structure of F[3]A1-[P(O)Ph]<sub>3</sub> with (G1) acetonitrile. Thermal ellipsoids were shown at 50% probability level.

|                                                              |                                                                                    |
|--------------------------------------------------------------|------------------------------------------------------------------------------------|
| CCDC number                                                  | 2330011                                                                            |
| Empirical formula                                            | C <sub>61</sub> H <sub>44.5</sub> N <sub>0.50</sub> O <sub>11</sub> P <sub>3</sub> |
| Formula weight                                               | 1053.38                                                                            |
| Temperature [K]                                              | 193.00                                                                             |
| Crystal system                                               | monoclinic                                                                         |
| Space group (number)                                         | <i>P</i> 2 <sub>1</sub> / <i>c</i>                                                 |
| <i>a</i> [Å]                                                 | 17.1058(3)                                                                         |
| <i>b</i> [Å]                                                 | 13.2609(3)                                                                         |
| <i>c</i> [Å]                                                 | 21.8092(4)                                                                         |
| $\alpha$ [°]                                                 | 90                                                                                 |
| $\beta$ [°]                                                  | 92.3200(10)                                                                        |
| $\gamma$ [°]                                                 | 90                                                                                 |
| Volume [Å <sup>3</sup> ]                                     | 4943.11(17)                                                                        |
| <i>Z</i>                                                     | 4                                                                                  |
| $\rho_{\text{calc}}$ [gcm <sup>-3</sup> ]                    | 1.415                                                                              |
| $\mu$ [mm <sup>-1</sup> ]                                    | 1.666                                                                              |
| <i>F</i> (000)                                               | 2188                                                                               |
| Crystal size [mm <sup>3</sup> ]                              | 0.15×0.14×0.13                                                                     |
| Radiation                                                    | CuK $\alpha$ ( $\lambda$ =1.54178 Å)                                               |
| 2 $\theta$ range [°]                                         | 8.11 to 136.58 (0.83 Å)                                                            |
| Index ranges                                                 | -20 ≤ <i>h</i> ≤ 20, -15 ≤ <i>k</i> ≤ 15, -26 ≤ <i>l</i> ≤ 26                      |
| Reflections collected                                        | 69137                                                                              |
| Independent reflections                                      | 9032, <i>R</i> <sub>int</sub> = 0.0759, <i>R</i> <sub>sigma</sub> = 0.0359         |
| Completeness to $\theta$ = 67.679°                           | 99.9 %                                                                             |
| Data / Restraints / Parameters                               | 9032/12/701                                                                        |
| Goodness-of-fit on <i>F</i> <sup>2</sup>                     | 1.075                                                                              |
| Final <i>R</i> indexes [ <i>I</i> ≥ 2 $\sigma$ ( <i>I</i> )] | <i>R</i> <sub>1</sub> = 0.0453, <i>wR</i> <sub>2</sub> = 0.1352                    |
| Final <i>R</i> indexes [all data]                            | <i>R</i> <sub>1</sub> = 0.0549, <i>wR</i> <sub>2</sub> = 0.1411,                   |
| Largest peak/hole [eÅ <sup>-3</sup> ]                        | 0.90/-0.59                                                                         |

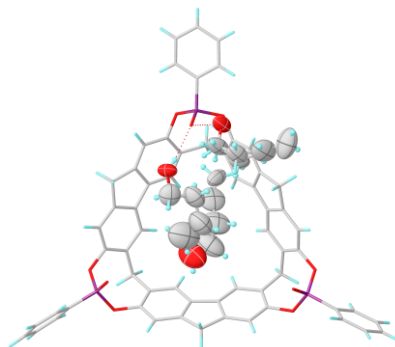

**Figure S2.** X-ray crystal structure of **F[3]A1-[P(O)Ph]<sub>3</sub>** with **(G2) 3-Buten-1-ol**  
Thermal ellipsoids were shown at 50% probability level.

|                                                                   |                                                                                             |
|-------------------------------------------------------------------|---------------------------------------------------------------------------------------------|
| CCDC number                                                       | 2356284                                                                                     |
| Empirical formula                                                 | C <sub>72</sub> H <sub>63</sub> O <sub>12</sub> P <sub>3</sub>                              |
| Formula weight                                                    | 1212.13                                                                                     |
| Temperature [K]                                                   | 193.0                                                                                       |
| Crystal system                                                    | triclinic                                                                                   |
| Space group (number)                                              | P-1                                                                                         |
| <i>a</i> [Å]                                                      | 14.186(4)                                                                                   |
| <i>b</i> [Å]                                                      | 14.529(4)                                                                                   |
| <i>c</i> [Å]                                                      | 17.292(5)                                                                                   |
| $\alpha$ [°]                                                      | 73.882(8)                                                                                   |
| $\beta$ [°]                                                       | 70.645(6)                                                                                   |
| $\gamma$ [°]                                                      | 79.586(7)                                                                                   |
| Volume [Å <sup>3</sup> ]                                          | 3215.0(16)                                                                                  |
| <i>Z</i>                                                          | 4                                                                                           |
| $\rho_{\text{calc}}$ [gcm <sup>-3</sup> ]                         | 1.253                                                                                       |
| $\mu$ [mm <sup>-1</sup> ]                                         | 0.155                                                                                       |
| <i>F</i> (000)                                                    | 1272                                                                                        |
| Radiation                                                         | CuK $\alpha$ ( $\lambda$ =1.54178 Å)                                                        |
| 2 $\theta$ range [°]                                              | 6.09 to 138.86 (0.82 Å)                                                                     |
| Index ranges                                                      | -14 $\leq$ <i>h</i> $\leq$ 14, -21 $\leq$ <i>k</i> $\leq$ 25, -24 $\leq$ <i>l</i> $\leq$ 24 |
| Reflections collected                                             | 36200                                                                                       |
| Independent reflections                                           | 14276, <i>R</i> <sub>int</sub> = 0.1288, <i>R</i> <sub>sigma</sub> = 0.1707                 |
| Completeness to $\theta$ = 67.679°                                | 97 %                                                                                        |
| Data / Restraints / Parameters                                    | 14276/80/796                                                                                |
| Goodness-of-fit on <i>F</i> <sup>2</sup>                          | 1.038                                                                                       |
| Final <i>R</i> indexes [ <i>I</i> $\geq$ 2 $\sigma$ ( <i>I</i> )] | <i>R</i> <sub>1</sub> = 0.0861, <i>wR</i> <sub>2</sub> = 0.1972                             |
| Final <i>R</i> indexes [all data]                                 | <i>R</i> <sub>1</sub> = 0.1818, <i>wR</i> <sub>2</sub> = 0.2492                             |
| Largest peak/hole [eÅ <sup>-3</sup> ]                             | 0.85/-0.64                                                                                  |

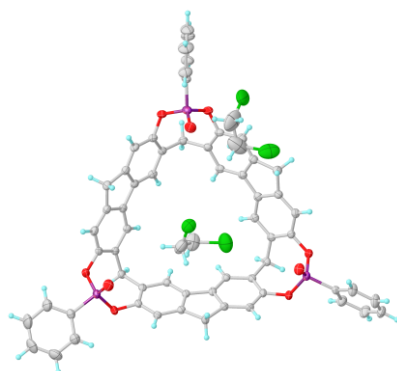

**Figure S3.** X-ray crystal structure of **F[3]A1-[P(O)Ph]<sub>3</sub>** with **(G3) dichloroethane**  
 Thermal ellipsoids were shown at 50% probability level.

|                                                                   |                                                                                             |
|-------------------------------------------------------------------|---------------------------------------------------------------------------------------------|
| CCDC number                                                       | 2330015                                                                                     |
| Empirical formula                                                 | C <sub>64</sub> H <sub>49</sub> Cl <sub>4</sub> O <sub>9</sub> P <sub>3</sub>               |
| Formula weight                                                    | 1212.72                                                                                     |
| Temperature [K]                                                   | 193.00                                                                                      |
| Crystal system                                                    | triclinic                                                                                   |
| Space group (number)                                              | <i>P</i> $\bar{1}$ (2)                                                                      |
| <i>a</i> [Å]                                                      | 10.9167(10)                                                                                 |
| <i>b</i> [Å]                                                      | 18.5273(12)                                                                                 |
| <i>c</i> [Å]                                                      | 18.9059(13)                                                                                 |
| $\alpha$ [°]                                                      | 114.169(2)                                                                                  |
| $\beta$ [°]                                                       | 99.202(3)                                                                                   |
| $\gamma$ [°]                                                      | 104.391(3)                                                                                  |
| Volume [Å <sup>3</sup> ]                                          | 3227.6(4)                                                                                   |
| <i>Z</i>                                                          | 2                                                                                           |
| $\rho_{\text{calc}}$ [gcm <sup>-3</sup> ]                         | 1.248                                                                                       |
| $\mu$ [mm <sup>-1</sup> ]                                         | 0.312                                                                                       |
| <i>F</i> (000)                                                    | 1252                                                                                        |
| Radiation                                                         | MoK $\alpha$ ( $\lambda$ =0.71073 Å)                                                        |
| 2 $\theta$ range [°]                                              | 4.03 to 55.03 (0.77 Å)                                                                      |
| Index ranges                                                      | -14 $\leq$ <i>h</i> $\leq$ 14, -24 $\leq$ <i>k</i> $\leq$ 24, -24 $\leq$ <i>l</i> $\leq$ 24 |
| Reflections collected                                             | 78665                                                                                       |
| Independent reflections                                           | 14646, <i>R</i> <sub>int</sub> = 0.0934, <i>R</i> <sub>sigma</sub> = 0.0610                 |
| Completeness to $\theta$ = 25.242°                                | 98.5 %                                                                                      |
| Data / Restraints / Parameters                                    | 14646/12/749                                                                                |
| Goodness-of-fit on <i>F</i> <sup>2</sup>                          | 1.037                                                                                       |
| Final <i>R</i> indexes [ <i>I</i> $\geq$ 2 $\sigma$ ( <i>I</i> )] | <i>R</i> <sub>1</sub> = 0.0673, <i>wR</i> <sub>2</sub> = 0.1918                             |
| Final <i>R</i> indexes [all data]                                 | <i>R</i> <sub>1</sub> = 0.0879, <i>wR</i> <sub>2</sub> = 0.2088                             |
| Largest peak/hole [eÅ <sup>-3</sup> ]                             | 0.86/-0.98                                                                                  |

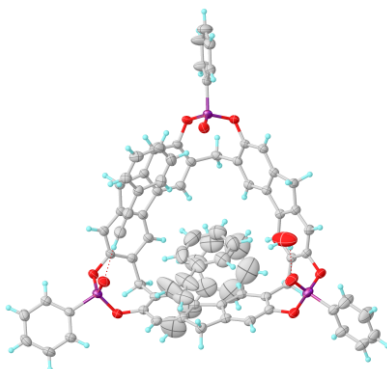

**Figure S4.** X-ray crystal structure of F[3]A1-[P(O)Ph]<sub>3</sub> with (G4) phenylacetylene  
Thermal ellipsoids were shown at 50% probability level.

|                                                |                                                                |
|------------------------------------------------|----------------------------------------------------------------|
| CCDC number                                    | 2330006                                                        |
| Empirical formula                              | C <sub>84</sub> H <sub>59</sub> O <sub>10</sub> P <sub>3</sub> |
| Formula weight                                 | 1321.22                                                        |
| Temperature [K]                                | 193.0                                                          |
| Crystal system                                 | triclinic                                                      |
| Space group (number)                           | $P\bar{1}$ (2)                                                 |
| <i>a</i> [Å]                                   | 11.8512(5)                                                     |
| <i>b</i> [Å]                                   | 15.6819(8)                                                     |
| <i>c</i> [Å]                                   | 18.9279(6)                                                     |
| $\alpha$ [°]                                   | 83.373(2)                                                      |
| $\beta$ [°]                                    | 73.483(2)                                                      |
| $\gamma$ [°]                                   | 85.472(2)                                                      |
| Volume [Å <sup>3</sup> ]                       | 3346.1(2)                                                      |
| <i>Z</i>                                       | 2                                                              |
| $\rho_{\text{calc}}$ [gcm <sup>-3</sup> ]      | 1.311                                                          |
| $\mu$ [mm <sup>-1</sup> ]                      | 0.861                                                          |
| <i>F</i> (000)                                 | 1376                                                           |
| Radiation                                      | GaK $\alpha$ ( $\lambda$ =1.34139 Å)                           |
| 2 $\theta$ range [°]                           | 4.94 to 107.94 (0.83 Å)                                        |
| Index ranges                                   | -14 ≤ <i>h</i> ≤ 14, -18 ≤ <i>k</i> ≤ 18, -22 ≤ <i>l</i> ≤ 22  |
| Reflections collected                          | 34538                                                          |
| Independent reflections                        | 12054, $R_{\text{int}} = 0.0338$ , $R_{\text{sigma}} = 0.0331$ |
| Completeness to $\theta = 53.594^\circ$        | 98.2 %                                                         |
| Data / Restraints / Parameters                 | 12054/12/875                                                   |
| Goodness-of-fit on $F^2$                       | 1.028                                                          |
| Final <i>R</i> indexes [ $I \geq 2\sigma(I)$ ] | $R_1 = 0.0500$ , $wR_2 = 0.1453$                               |
| Final <i>R</i> indexes [all data]              | $R_1 = 0.0534$ , $wR_2 = 0.1487$                               |
| Largest peak/hole [eÅ <sup>-3</sup> ]          | 0.99/-0.42                                                     |

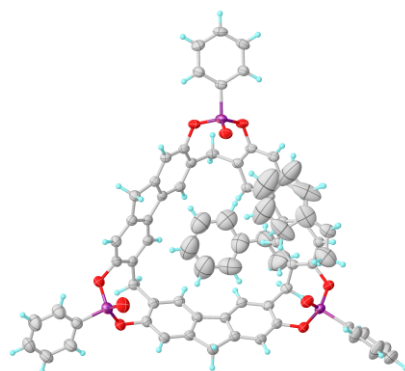

**Figure S5.** X-ray crystal structure of **F[3]A1-[P(O)Ph]<sub>3</sub>** with **(G5) ethylbenzene**  
Thermal ellipsoids were shown at 50% probability level.

|                                                                   |                                                                                             |
|-------------------------------------------------------------------|---------------------------------------------------------------------------------------------|
| CCDC number                                                       | 2330014                                                                                     |
| Empirical formula                                                 | C <sub>76</sub> H <sub>59</sub> O <sub>9</sub> P <sub>3</sub>                               |
| Formula weight                                                    | 1209.14                                                                                     |
| Temperature [K]                                                   | 193.00                                                                                      |
| Crystal system                                                    | monoclinic                                                                                  |
| Space group (number)                                              | <i>P</i> 2 <sub>1</sub> / <i>n</i> (14)                                                     |
| <i>a</i> [Å]                                                      | 15.5508(5)                                                                                  |
| <i>b</i> [Å]                                                      | 20.5957(6)                                                                                  |
| <i>c</i> [Å]                                                      | 19.1864(6)                                                                                  |
| $\alpha$ [°]                                                      | 90                                                                                          |
| $\beta$ [°]                                                       | 102.901(2)                                                                                  |
| $\gamma$ [°]                                                      | 90                                                                                          |
| Volume [Å <sup>3</sup> ]                                          | 5989.9(3)                                                                                   |
| <i>Z</i>                                                          | 4                                                                                           |
| $\rho_{\text{calc}}$ [gcm <sup>-3</sup> ]                         | 1.341                                                                                       |
| $\mu$ [mm <sup>-1</sup> ]                                         | 1.419                                                                                       |
| <i>F</i> (000)                                                    | 2528                                                                                        |
| Radiation                                                         | CuK $\alpha$ ( $\lambda$ =1.54184 Å)                                                        |
| 2 $\theta$ range [°]                                              | 6.38 to 136.70 (0.83 Å)                                                                     |
| Index ranges                                                      | -18 $\leq$ <i>h</i> $\leq$ 18, -24 $\leq$ <i>k</i> $\leq$ 24, -23 $\leq$ <i>l</i> $\leq$ 23 |
| Reflections collected                                             | 83760                                                                                       |
| Independent reflections                                           | 10967, <i>R</i> <sub>int</sub> = 0.0658, <i>R</i> <sub>sigma</sub> = 0.0308                 |
| Completeness to $\theta$ = 67.684°                                | 100.0 %                                                                                     |
| Data / Restraints / Parameters                                    | 10967/9/794                                                                                 |
| Goodness-of-fit on <i>F</i> <sup>2</sup>                          | 1.062                                                                                       |
| Final <i>R</i> indexes [ <i>I</i> $\geq$ 2 $\sigma$ ( <i>I</i> )] | <i>R</i> <sub>1</sub> = 0.0594, <i>wR</i> <sub>2</sub> = 0.1777                             |
| Final <i>R</i> indexes [all data]                                 | <i>R</i> <sub>1</sub> = 0.0704, <i>wR</i> <sub>2</sub> = 0.1879                             |
| Largest peak/hole [eÅ <sup>-3</sup> ]                             | 0.84/-0.70                                                                                  |

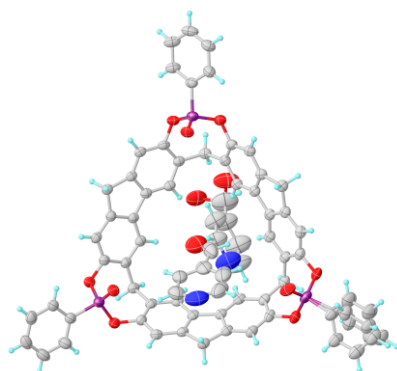

**Figure S6.** X-ray crystal structure of F[3]A1-[P(O)Ph]<sub>3</sub> with (G6) 4-pyridinecarboxaldehyde

Thermal ellipsoids were shown at 50% probability level.

|                                                |                                                                                             |
|------------------------------------------------|---------------------------------------------------------------------------------------------|
| CCDC number                                    | 2330017                                                                                     |
| Empirical formula                              | C <sub>72</sub> H <sub>49</sub> N <sub>2</sub> O <sub>11</sub> P <sub>3</sub>               |
| Formula weight                                 | 1211.04                                                                                     |
| Temperature [K]                                | 193.00                                                                                      |
| Crystal system                                 | triclinic                                                                                   |
| Space group (number)                           | $P\bar{1}$ (2)                                                                              |
| <i>a</i> [Å]                                   | 13.3547(10)                                                                                 |
| <i>b</i> [Å]                                   | 14.8169(9)                                                                                  |
| <i>c</i> [Å]                                   | 18.9025(13)                                                                                 |
| $\alpha$ [°]                                   | 70.696(2)                                                                                   |
| $\beta$ [°]                                    | 71.926(3)                                                                                   |
| $\gamma$ [°]                                   | 76.581(2)                                                                                   |
| Volume [Å <sup>3</sup> ]                       | 3320.7(4)                                                                                   |
| <i>Z</i>                                       | 2                                                                                           |
| $\rho_{\text{calc}}$ [gcm <sup>-3</sup> ]      | 1.211                                                                                       |
| $\mu$ [mm <sup>-1</sup> ]                      | 0.150                                                                                       |
| <i>F</i> (000)                                 | 1256                                                                                        |
| Radiation                                      | MoK $\alpha$ ( $\lambda$ =0.71073 Å)                                                        |
| 2 $\theta$ range [°]                           | 4.05 to 55.29 (0.77 Å)                                                                      |
| Index ranges                                   | -17 $\leq$ <i>h</i> $\leq$ 17, -19 $\leq$ <i>k</i> $\leq$ 16, -24 $\leq$ <i>l</i> $\leq$ 24 |
| Reflections collected                          | 85737                                                                                       |
| Independent reflections                        | 15307, $R_{\text{int}}$ = 0.1093, $R_{\text{sigma}}$ = 0.0680                               |
| Completeness to $\theta$ = 25.242°             | 99.9 %                                                                                      |
| Data / Restraints / Parameters                 | 15307/13/833                                                                                |
| Goodness-of-fit on $F^2$                       | 1.015                                                                                       |
| Final <i>R</i> indexes [ $I \geq 2\sigma(I)$ ] | $R_1$ = 0.0670, $wR_2$ = 0.1839                                                             |
| Final <i>R</i> indexes [all data]              | $R_1$ = 0.1026, $wR_2$ = 0.2185                                                             |
| Largest peak/hole [eÅ <sup>-3</sup> ]          | 1.12/-0.66                                                                                  |

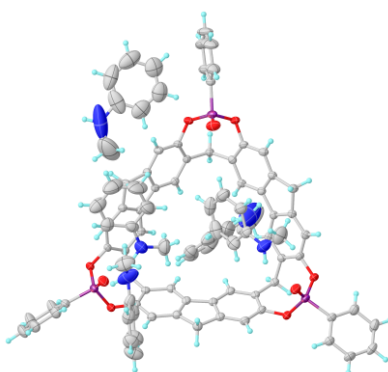

**Figure S7.** X-ray crystal structure of **F[3]A1-[P(O)Ph]<sub>3</sub>** with **(G7) N-methylaniline**  
 Thermal ellipsoids were shown at 50% probability level.

|                                                |                                                                                             |
|------------------------------------------------|---------------------------------------------------------------------------------------------|
| CCDC number                                    | 2330018                                                                                     |
| Empirical formula                              | C <sub>95</sub> H <sub>84</sub> N <sub>5</sub> O <sub>9</sub> P <sub>3</sub>                |
| Formula weight                                 | 1532.58                                                                                     |
| Temperature [K]                                | 193.00                                                                                      |
| Crystal system                                 | triclinic                                                                                   |
| Space group (number)                           | $P\bar{1}$ (2)                                                                              |
| <i>a</i> [Å]                                   | 12.8799(6)                                                                                  |
| <i>b</i> [Å]                                   | 19.0892(9)                                                                                  |
| <i>c</i> [Å]                                   | 19.3225(10)                                                                                 |
| $\alpha$ [°]                                   | 111.977(2)                                                                                  |
| $\beta$ [°]                                    | 99.799(2)                                                                                   |
| $\gamma$ [°]                                   | 103.358(2)                                                                                  |
| Volume [Å <sup>3</sup> ]                       | 4109.3(4)                                                                                   |
| <i>Z</i>                                       | 2                                                                                           |
| $\rho_{\text{calc}}$ [gcm <sup>-3</sup> ]      | 1.239                                                                                       |
| $\mu$ [mm <sup>-1</sup> ]                      | 0.135                                                                                       |
| <i>F</i> (000)                                 | 1612                                                                                        |
| Radiation                                      | MoK $\alpha$ ( $\lambda$ =0.71073 Å)                                                        |
| 2 $\theta$ range [°]                           | 4.06 to 55.11 (0.77 Å)                                                                      |
| Index ranges                                   | -16 $\leq$ <i>h</i> $\leq$ 16, -24 $\leq$ <i>k</i> $\leq$ 24, -25 $\leq$ <i>l</i> $\leq$ 25 |
| Reflections collected                          | 90603                                                                                       |
| Independent reflections                        | 18708, $R_{\text{int}}$ = 0.1115, $R_{\text{sigma}}$ = 0.0779                               |
| Completeness to $\theta$ = 25.242°             | 99.2 %                                                                                      |
| Data / Restraints / Parameters                 | 18708/4/990                                                                                 |
| Goodness-of-fit on $F^2$                       | 1.101                                                                                       |
| Final <i>R</i> indexes [ $I \geq 2\sigma(I)$ ] | $R_1$ = 0.0692, $wR_2$ = 0.1706                                                             |
| Final <i>R</i> indexes [all data]              | $R_1$ = 0.1078, $wR_2$ = 0.1973                                                             |
| Largest peak/hole [eÅ <sup>-3</sup> ]          | 1.06/-0.86                                                                                  |



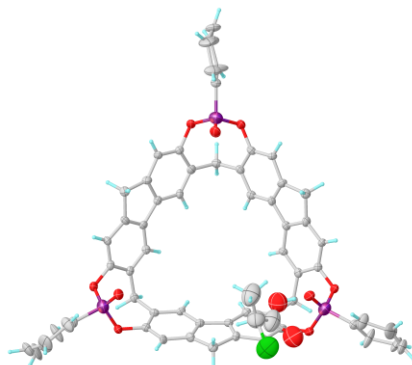

**Figure S8.** X-ray crystal structure of F[3]A1-[P(O)Ph]<sub>3</sub> with (G8) 2-chloropropionic-acid

Thermal ellipsoids were shown at 50% probability level.

|                                                                   |                                                                                             |
|-------------------------------------------------------------------|---------------------------------------------------------------------------------------------|
| CCDC number                                                       | 2330020                                                                                     |
| Empirical formula                                                 | C <sub>43</sub> H <sub>30</sub> ClO <sub>8</sub> P <sub>2</sub>                             |
| Formula weight                                                    | 772.06                                                                                      |
| Temperature [K]                                                   | 193.0                                                                                       |
| Crystal system                                                    | trigonal                                                                                    |
| Space group (number)                                              | <i>R</i> 3 *                                                                                |
| <i>a</i> [Å]                                                      | 18.9846(4)                                                                                  |
| <i>b</i> [Å]                                                      | 18.9846(4)                                                                                  |
| <i>c</i> [Å]                                                      | 40.8214(17)                                                                                 |
| $\alpha$ [°]                                                      | 90                                                                                          |
| $\beta$ [°]                                                       | 90                                                                                          |
| $\gamma$ [°]                                                      | 120                                                                                         |
| Volume [Å <sup>3</sup> ]                                          | 12741.5(8)                                                                                  |
| <i>Z</i>                                                          | 1                                                                                           |
| $\rho_{\text{calc}}$ [gcm <sup>-3</sup> ]                         | 0.906                                                                                       |
| $\mu$ [mm <sup>-1</sup> ]                                         | 1.435                                                                                       |
| <i>F</i> (000)                                                    | 3591                                                                                        |
| Radiation                                                         | CuK $\alpha$ ( $\lambda$ =1.54178 Å)                                                        |
| 2 $\theta$ range [°]                                              | 5.79 to 136.89 (0.83 Å)                                                                     |
| Index ranges                                                      | -22 $\leq$ <i>h</i> $\leq$ 22, -22 $\leq$ <i>k</i> $\leq$ 22, -49 $\leq$ <i>l</i> $\leq$ 49 |
| Reflections collected                                             | 181503                                                                                      |
| Independent reflections                                           | 10372, <i>R</i> <sub>int</sub> = 0.0608, <i>R</i> <sub>sigma</sub> = 0.0212                 |
| Completeness to $\theta$ = 67.679°                                | 100.0 %                                                                                     |
| Data / Restraints / Parameters                                    | 10372/12/546                                                                                |
| Goodness-of-fit on <i>F</i> <sup>2</sup>                          | 1.113                                                                                       |
| Final <i>R</i> indexes [ <i>I</i> $\geq$ 2 $\sigma$ ( <i>I</i> )] | <i>R</i> <sub>1</sub> = 0.0457, <i>wR</i> <sub>2</sub> = 0.1381                             |
| Final <i>R</i> indexes [all data]                                 | <i>R</i> <sub>1</sub> = 0.0492, <i>wR</i> <sub>2</sub> = 0.1420                             |
| Largest peak/hole [eÅ <sup>-3</sup> ]                             | 0.20/-0.30                                                                                  |

\*: G8 and F[3]A1-[P(O)Ph]<sub>3</sub> form a racemic mixture.

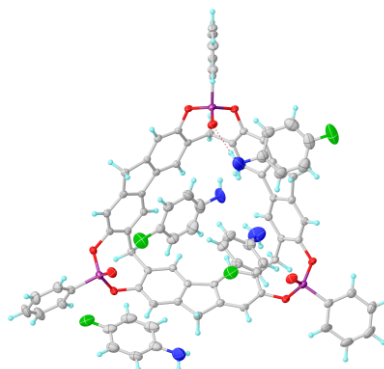

**Figure S9.** X-ray crystal structure of **F[3]A1-[P(O)Ph]<sub>3</sub>** with **(G9) 4-fluoroaniline**  
 Thermal ellipsoids were shown at 50% probability level.

|                                                |                                                                                             |
|------------------------------------------------|---------------------------------------------------------------------------------------------|
| CCDC number                                    | 2330007                                                                                     |
| Empirical formula                              | C <sub>84</sub> H <sub>63</sub> F <sub>4</sub> N <sub>4</sub> O <sub>9</sub> P <sub>3</sub> |
| Formula weight                                 | 1441.29                                                                                     |
| Temperature [K]                                | 193.00                                                                                      |
| Crystal system                                 | triclinic                                                                                   |
| Space group (number)                           | $P\bar{1}$ (2)                                                                              |
| <i>a</i> [Å]                                   | 11.1731(8)                                                                                  |
| <i>b</i> [Å]                                   | 17.0700(12)                                                                                 |
| <i>c</i> [Å]                                   | 20.0546(13)                                                                                 |
| $\alpha$ [°]                                   | 103.439(3)                                                                                  |
| $\beta$ [°]                                    | 97.936(4)                                                                                   |
| $\gamma$ [°]                                   | 106.945(4)                                                                                  |
| Volume [Å <sup>3</sup> ]                       | 3470.5(4)                                                                                   |
| <i>Z</i>                                       | 2                                                                                           |
| $\rho_{\text{calc}}$ [gcm <sup>-3</sup> ]      | 1.379                                                                                       |
| $\mu$ [mm <sup>-1</sup> ]                      | 1.421                                                                                       |
| <i>F</i> (000)                                 | 1496                                                                                        |
| Radiation                                      | CuK $\alpha$ ( $\lambda$ =1.54178 Å)                                                        |
| 2 $\theta$ range [°]                           | 4.65 to 136.49 (0.83 Å)                                                                     |
| Index ranges                                   | -13 ≤ <i>h</i> ≤ 13, -20 ≤ <i>k</i> ≤ 20, -24 ≤ <i>l</i> ≤ 22                               |
| Reflections collected                          | 37028                                                                                       |
| Independent reflections                        | 12549, $R_{\text{int}} = 0.0750$ , $R_{\text{sigma}} = 0.0803$                              |
| Completeness to $\theta = 67.679^\circ$        | 98.8 %                                                                                      |
| Data / Restraints / Parameters                 | 12549/0/941                                                                                 |
| Goodness-of-fit on $F^2$                       | 1.074                                                                                       |
| Final <i>R</i> indexes [ $I \geq 2\sigma(I)$ ] | $R_1 = 0.0498$ , $wR_2 = 0.1410$                                                            |
| Final <i>R</i> indexes [all data]              | $R_1 = 0.0750$ , $wR_2 = 0.1490$                                                            |
| Largest peak/hole [eÅ <sup>-3</sup> ]          | 0.56/-0.74                                                                                  |

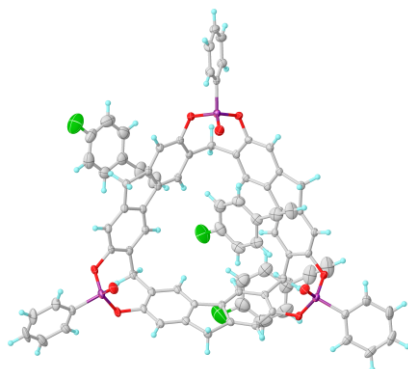

**Figure S10.** X-ray crystal structure of F[3]A1-[P(O)Ph]<sub>3</sub> with (G10) 4-fluorophenylacetylene

Thermal ellipsoids were shown at 50% probability level.

|                                                |                                                                                              |
|------------------------------------------------|----------------------------------------------------------------------------------------------|
| CCDC number                                    | 2356642                                                                                      |
| Empirical formula                              | C <sub>84</sub> H <sub>61</sub> Cl <sub>5</sub> F <sub>3</sub> O <sub>9</sub> P <sub>3</sub> |
| Formula weight                                 | 1601.53                                                                                      |
| Temperature [K]                                | 193.00                                                                                       |
| Crystal system                                 | triclinic                                                                                    |
| Space group (number)                           | $P\bar{1}$ (2)                                                                               |
| <i>a</i> [Å]                                   | 11.1544(6)                                                                                   |
| <i>b</i> [Å]                                   | 17.3791(9)                                                                                   |
| <i>c</i> [Å]                                   | 19.6218(10)                                                                                  |
| $\alpha$ [°]                                   | 82.448(2)                                                                                    |
| $\beta$ [°]                                    | 87.009(2)                                                                                    |
| $\gamma$ [°]                                   | 83.127(2)                                                                                    |
| Volume [Å <sup>3</sup> ]                       | 3741.1(3)                                                                                    |
| <i>Z</i>                                       | 2                                                                                            |
| $\rho_{\text{calc}}$ [gcm <sup>-3</sup> ]      | 1.422                                                                                        |
| $\mu$ [mm <sup>-1</sup> ]                      | 2.946                                                                                        |
| <i>F</i> (000)                                 | 1648                                                                                         |
| Radiation                                      | CuK $\alpha$ ( $\lambda$ =1.54178 Å)                                                         |
| 2 $\theta$ range [°]                           | 4.55 to 140.14 (0.82 Å)                                                                      |
| Index ranges                                   | -13 ≤ <i>h</i> ≤ 13, -21 ≤ <i>k</i> ≤ 21, -23 ≤ <i>l</i> ≤ 23                                |
| Reflections collected                          | 62252                                                                                        |
| Independent reflections                        | 13980, $R_{\text{int}}$ = 0.0427, $R_{\text{sigma}}$ = 0.0364                                |
| Completeness to $\theta$ = 67.679°             | 98.8 %                                                                                       |
| Data / Restraints / Parameters                 | 13980/28/892                                                                                 |
| Goodness-of-fit on $F^2$                       | 1.056                                                                                        |
| Final <i>R</i> indexes [ $I \geq 2\sigma(I)$ ] | $R_1$ = 0.0587, $wR_2$ = 0.1596                                                              |
| Final <i>R</i> indexes [all data]              | $R_1$ = 0.0632, $wR_2$ = 0.1624                                                              |
| Largest peak/hole [eÅ <sup>-3</sup> ]          | 0.99/-1.04                                                                                   |

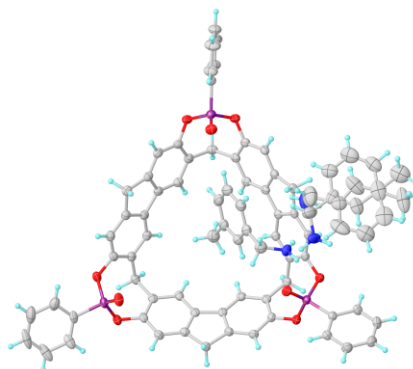

**Figure S11.** X-ray crystal structure of F[3]A1-[P(O)Ph]<sub>3</sub> with (G11) 3-methylbenzylamine

Thermal ellipsoids were shown at 50% probability level.

|                                           |                                                                              |
|-------------------------------------------|------------------------------------------------------------------------------|
| CCDC number                               | 2330012                                                                      |
| Empirical formula                         | C <sub>76</sub> H <sub>60</sub> N <sub>2</sub> O <sub>9</sub> P <sub>3</sub> |
| Formula weight                            | 1238.17                                                                      |
| Temperature [K]                           | 193(2)                                                                       |
| Crystal system                            | triclinic                                                                    |
| Space group (number)                      | $P\bar{1}$ (2)                                                               |
| <i>a</i> [Å]                              | 13.680(3)                                                                    |
| <i>b</i> [Å]                              | 14.519(2)                                                                    |
| <i>c</i> [Å]                              | 16.454(3)                                                                    |
| $\alpha$ [°]                              | 73.660(7)                                                                    |
| $\beta$ [°]                               | 80.822(6)                                                                    |
| $\gamma$ [°]                              | 74.493(8)                                                                    |
| Volume [Å <sup>3</sup> ]                  | 3009.3(10)                                                                   |
| <i>Z</i>                                  | 2                                                                            |
| $\rho_{\text{calc}}$ [gcm <sup>-3</sup> ] | 1.366                                                                        |
| $\mu$ [mm <sup>-1</sup> ]                 | 0.164                                                                        |
| <i>F</i> (000)                            | 1294                                                                         |
| Radiation                                 | MoK $\alpha$ ( $\lambda$ =0.71073 Å)                                         |
| 2 $\theta$ range [°]                      | 5.14 to 55.06 (0.77 Å)                                                       |
| Index ranges                              | -17 $\leq$ h $\leq$ 17, -18 $\leq$ k $\leq$ 18, -21 $\leq$ l $\leq$ 21       |
| Reflections collected                     | 65778                                                                        |
| Independent reflections                   | 13701, $R_{\text{int}}$ = 0.0881, $R_{\text{sigma}}$ = 0.0617                |
| Completeness to $\theta$ = 25.242°        | 98.8 %                                                                       |
| Data / Restraints / Parameters            | 13701/8/886                                                                  |
| Goodness-of-fit on $F^2$                  | 1.030                                                                        |
| Final $R$ indexes [ $I \geq 2\sigma(I)$ ] | $R_1$ = 0.0548, $wR_2$ = 0.1348                                              |
| Final $R$ indexes [all data]              | $R_1$ = 0.0807, $wR_2$ = 0.1544                                              |
| Largest peak/hole [eÅ <sup>-3</sup> ]     | 0.56/-0.62                                                                   |

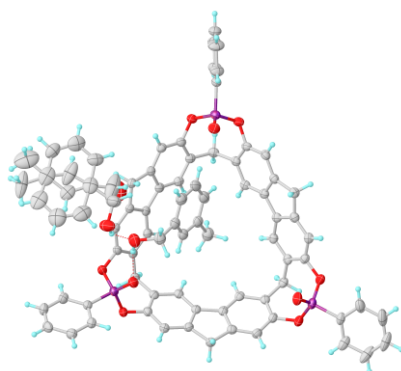

**Figure S12.** X-ray crystal structure of F[3]A1-[P(O)Ph]<sub>3</sub> with (G12) 3-methylbenzyl alcohol

Thermal ellipsoids were shown at 50% probability level.

|                                                |                                                                                             |
|------------------------------------------------|---------------------------------------------------------------------------------------------|
| CCDC number                                    | 2330010                                                                                     |
| Empirical formula                              | C <sub>76</sub> H <sub>58</sub> O <sub>11</sub> P <sub>3</sub>                              |
| Formula weight                                 | 1240.13                                                                                     |
| Temperature [K]                                | 193.00                                                                                      |
| Crystal system                                 | triclinic                                                                                   |
| Space group (number)                           | $P\bar{1}$ (2)                                                                              |
| <i>a</i> [Å]                                   | 13.683(2)                                                                                   |
| <i>b</i> [Å]                                   | 14.523(2)                                                                                   |
| <i>c</i> [Å]                                   | 16.463(3)                                                                                   |
| $\alpha$ [°]                                   | 73.664(5)                                                                                   |
| $\beta$ [°]                                    | 80.764(6)                                                                                   |
| $\gamma$ [°]                                   | 74.490(4)                                                                                   |
| Volume [Å <sup>3</sup> ]                       | 3012.3(8)                                                                                   |
| <i>Z</i>                                       | 2                                                                                           |
| $\rho_{\text{calc}}$ [gcm <sup>-3</sup> ]      | 1.367                                                                                       |
| $\mu$ [mm <sup>-1</sup> ]                      | 0.166                                                                                       |
| <i>F</i> (000)                                 | 1294                                                                                        |
| Radiation                                      | MoK $\alpha$ ( $\lambda$ =0.71073 Å)                                                        |
| 2 $\theta$ range [°]                           | 3.85 to 55.08 (0.77 Å)                                                                      |
| Index ranges                                   | -17 $\leq$ <i>h</i> $\leq$ 17, -18 $\leq$ <i>k</i> $\leq$ 17, -21 $\leq$ <i>l</i> $\leq$ 21 |
| Reflections collected                          | 79405                                                                                       |
| Independent reflections                        | 13827, $R_{\text{int}}$ = 0.1185, $R_{\text{sigma}}$ = 0.0753                               |
| Completeness to $\theta$ = 25.242°             | 99.9 %                                                                                      |
| Data / Restraints / Parameters                 | 13827/0/880                                                                                 |
| Goodness-of-fit on $F^2$                       | 1.035                                                                                       |
| Final <i>R</i> indexes [ $I \geq 2\sigma(I)$ ] | $R_1$ = 0.0547, $wR_2$ = 0.1220                                                             |
| Final <i>R</i> indexes [all data]              | $R_1$ = 0.0898, $wR_2$ = 0.1514                                                             |
| Largest peak/hole [eÅ <sup>-3</sup> ]          | 0.57/-0.45                                                                                  |

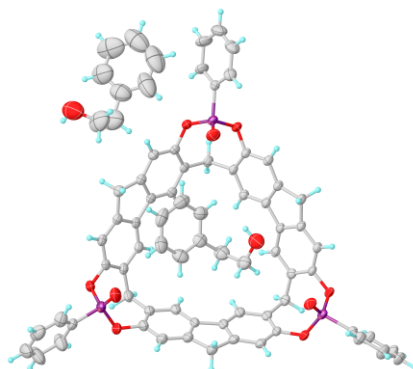

**Figure S13.** X-ray crystal structure of F[3]A1-[P(O)Ph]<sub>3</sub> with (G13) phenethyl alcohol

Thermal ellipsoids were shown at 50% probability level.

|                                                |                                                                                             |
|------------------------------------------------|---------------------------------------------------------------------------------------------|
| CCDC number                                    | 2330019                                                                                     |
| Empirical formula                              | C <sub>144</sub> H <sub>108</sub> O <sub>21</sub> P <sub>6</sub>                            |
| Formula weight                                 | 2360.12                                                                                     |
| Temperature [K]                                | 193.15                                                                                      |
| Crystal system                                 | triclinic                                                                                   |
| Space group (number)                           | $P\bar{1}$ (2)                                                                              |
| <i>a</i> [Å]                                   | 13.325(6)                                                                                   |
| <i>b</i> [Å]                                   | 16.308(5)                                                                                   |
| <i>c</i> [Å]                                   | 31.821(8)                                                                                   |
| $\alpha$ [°]                                   | 102.082(14)                                                                                 |
| $\beta$ [°]                                    | 93.45(2)                                                                                    |
| $\gamma$ [°]                                   | 99.70(2)                                                                                    |
| Volume [Å <sup>3</sup> ]                       | 6632(4)                                                                                     |
| <i>Z</i>                                       | 2                                                                                           |
| $\rho_{\text{calc}}$ [gcm <sup>-3</sup> ]      | 1.182                                                                                       |
| $\mu$ [mm <sup>-1</sup> ]                      | 1.287                                                                                       |
| <i>F</i> (000)                                 | 2460                                                                                        |
| Radiation                                      | CuK $\alpha$ ( $\lambda$ =1.54178 Å)                                                        |
| 2 $\theta$ range [°]                           | 5.64 to 137.87 (0.83 Å)                                                                     |
| Index ranges                                   | -16 $\leq$ <i>h</i> $\leq$ 16, -19 $\leq$ <i>k</i> $\leq$ 19, -38 $\leq$ <i>l</i> $\leq$ 38 |
| Reflections collected                          | 105094                                                                                      |
| Independent reflections                        | 24358, $R_{\text{int}}$ = 0.0600, $R_{\text{sigma}}$ = 0.0470                               |
| Completeness to $\theta$ = 67.679°             | 99.7 %                                                                                      |
| Data / Restraints / Parameters                 | 24358/6/1488                                                                                |
| Goodness-of-fit on $F^2$                       | 1.052                                                                                       |
| Final <i>R</i> indexes [ $I \geq 2\sigma(I)$ ] | $R_1$ = 0.0894, $wR_2$ = 0.2684                                                             |
| Final <i>R</i> indexes [all data]              | $R_1$ = 0.1060, $wR_2$ = 0.2892                                                             |
| Largest peak/hole [eÅ <sup>-3</sup> ]          | 1.46/-0.77                                                                                  |

**IUCr's Checkcif provided one level B errors:**

*PLAT420\_ALERT\_2\_B D-H Bond Without Acceptor O03C -H2.*

*PLAT420\_ALERT\_2\_B D-H Bond Without Acceptor O00R --H00R.*

*PLAT420\_ALERT\_2\_B D-H Bond Without Acceptor O046 --H046.*

**RESPONSE:**

The structure of the co-crystals shows that (**G13**) phenethyl alcohol is present on the outside of the cavity of the macrocyclic **F[3]A1-[P(O)Ph]<sub>3</sub>** and that there are no weak hydrogen-bonding interactions between the oxygen atoms **O03C**, **O00R** and **O046** and any adjacent **F[3]A1-[P(O)Ph]<sub>3</sub>**, resulting in no receptor for the oxygen atom on the hydroxyl group.

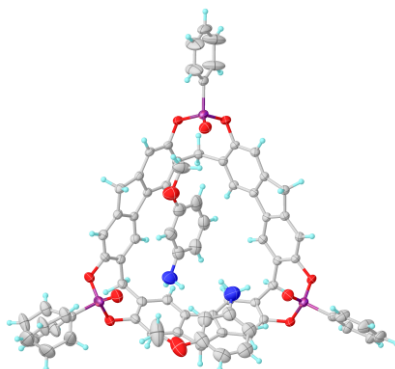

**Figure S14.** X-ray crystal structure of F[3]A1-[P(O)Ph]<sub>3</sub> with (G14) 3-methoxyaniline

Thermal ellipsoids were shown at 50% probability level.

|                                                |                                                                                             |
|------------------------------------------------|---------------------------------------------------------------------------------------------|
| CCDC number                                    | 2330016                                                                                     |
| Empirical formula                              | C <sub>74</sub> H <sub>57</sub> N <sub>2</sub> O <sub>11</sub> P <sub>3</sub>               |
| Formula weight                                 | 1243.12                                                                                     |
| Temperature [K]                                | 193.00                                                                                      |
| Crystal system                                 | triclinic                                                                                   |
| Space group (number)                           | $P\bar{1}$ (2)                                                                              |
| <i>a</i> [Å]                                   | 11.8580(12)                                                                                 |
| <i>b</i> [Å]                                   | 15.8015(16)                                                                                 |
| <i>c</i> [Å]                                   | 18.275(2)                                                                                   |
| $\alpha$ [°]                                   | 106.903(3)                                                                                  |
| $\beta$ [°]                                    | 106.952(3)                                                                                  |
| $\gamma$ [°]                                   | 98.989(5)                                                                                   |
| Volume [Å <sup>3</sup> ]                       | 3023.4(6)                                                                                   |
| <i>Z</i>                                       | 2                                                                                           |
| $\rho_{\text{calc}}$ [gcm <sup>-3</sup> ]      | 1.366                                                                                       |
| $\mu$ [mm <sup>-1</sup> ]                      | 0.166                                                                                       |
| <i>F</i> (000)                                 | 1296                                                                                        |
| Radiation                                      | MoK $\alpha$ ( $\lambda$ =0.71073 Å)                                                        |
| 2 $\theta$ range [°]                           | 4.02 to 55.05 (0.77 Å)                                                                      |
| Index ranges                                   | -15 $\leq$ <i>h</i> $\leq$ 15, -20 $\leq$ <i>k</i> $\leq$ 20, -23 $\leq$ <i>l</i> $\leq$ 23 |
| Reflections collected                          | 85189                                                                                       |
| Independent reflections                        | 13875, $R_{\text{int}}$ = 0.0965, $R_{\text{sigma}}$ = 0.0601                               |
| Completeness to $\theta$ = 25.242°             | 99.9 %                                                                                      |
| Data / Restraints / Parameters                 | 13875/6/839                                                                                 |
| Goodness-of-fit on $F^2$                       | 1.039                                                                                       |
| Final <i>R</i> indexes [ $I \geq 2\sigma(I)$ ] | $R_1$ = 0.0625, $wR_2$ = 0.1635                                                             |
| Final <i>R</i> indexes [all data]              | $R_1$ = 0.0886, $wR_2$ = 0.1898                                                             |
| Largest peak/hole [eÅ <sup>-3</sup> ]          | 0.99/-0.85                                                                                  |



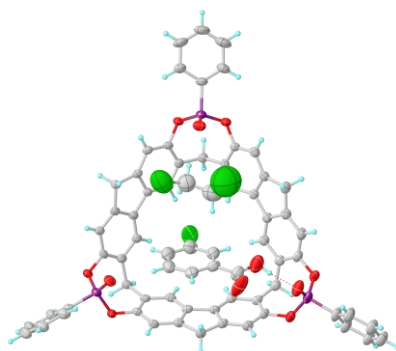

**Figure S15.** X-ray crystal structure of F[3]A1-[P(O)Ph]<sub>3</sub> with (G15) 3-fluorobenzoic acid

Thermal ellipsoids were shown at 50% probability level.

|                                                              |                                                                                 |
|--------------------------------------------------------------|---------------------------------------------------------------------------------|
| CCDC number                                                  | 2330009                                                                         |
| Empirical formula                                            | C <sub>71</sub> H <sub>52</sub> FCl <sub>4</sub> O <sub>11</sub> P <sub>3</sub> |
| Formula weight                                               | 1334.83                                                                         |
| Temperature [K]                                              | 193.00                                                                          |
| Crystal system                                               | triclinic                                                                       |
| Space group (number)                                         | $P\bar{1}$ (2)                                                                  |
| <i>a</i> [Å]                                                 | 11.6380(3)                                                                      |
| <i>b</i> [Å]                                                 | 17.0699(4)                                                                      |
| <i>c</i> [Å]                                                 | 18.9097(4)                                                                      |
| $\alpha$ [°]                                                 | 91.8030(10)                                                                     |
| $\beta$ [°]                                                  | 91.359(2)                                                                       |
| $\gamma$ [°]                                                 | 97.2050(10)                                                                     |
| Volume [Å <sup>3</sup> ]                                     | 3723.63(15)                                                                     |
| <i>Z</i>                                                     | 2                                                                               |
| $\rho_{\text{calc}}$ [gcm <sup>-3</sup> ]                    | 1.091                                                                           |
| $\mu$ [mm <sup>-1</sup> ]                                    | 2.517                                                                           |
| <i>F</i> (000)                                               | 1376                                                                            |
| Radiation                                                    | CuK $\alpha$ ( $\lambda$ =1.54178 Å)                                            |
| 2 $\theta$ range [°]                                         | 4.68 to 136.81 (0.83 Å)                                                         |
| Index ranges                                                 | -13 ≤ <i>h</i> ≤ 14, -20 ≤ <i>k</i> ≤ 19, -22 ≤ <i>l</i> ≤ 22                   |
| Reflections collected                                        | 48340                                                                           |
| Independent reflections                                      | 13419, <i>R</i> <sub>int</sub> = 0.0879, <i>R</i> <sub>sigma</sub> = 0.0747     |
| Completeness to $\theta$ = 67.679°                           | 98.6 %                                                                          |
| Data / Restraints / Parameters                               | 13419/70/753                                                                    |
| Goodness-of-fit on <i>F</i> <sup>2</sup>                     | 1.021                                                                           |
| Final <i>R</i> indexes [ <i>I</i> ≥ 2 $\sigma$ ( <i>I</i> )] | <i>R</i> <sub>1</sub> = 0.0922, <i>wR</i> <sub>2</sub> = 0.2504                 |
| Final <i>R</i> indexes [all data]                            | <i>R</i> <sub>1</sub> = 0.1266, <i>wR</i> <sub>2</sub> = 0.2710                 |
| Largest peak/hole [eÅ <sup>-3</sup> ]                        | 0.83/-0.87                                                                      |

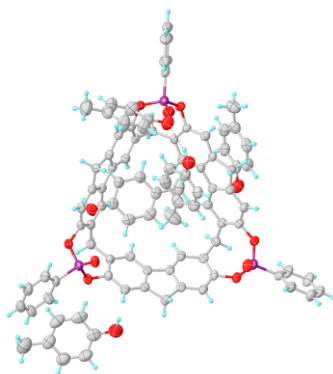

**Figure S16.** X-ray crystal structure of **F[3]A1-[P(O)Ph]<sub>3</sub>** with **(G16) p-Cresol**  
Thermal ellipsoids were shown at 50% probability level.

|                                                |                                                                |
|------------------------------------------------|----------------------------------------------------------------|
| CCDC number                                    | 2330077                                                        |
| Empirical formula                              | C <sub>95</sub> H <sub>79</sub> O <sub>14</sub> P <sub>3</sub> |
| Formula weight                                 | 1537.49                                                        |
| Temperature [K]                                | 193.00                                                         |
| Crystal system                                 | triclinic                                                      |
| Space group (number)                           | $P\bar{1}$ (2)                                                 |
| <i>a</i> [Å]                                   | 9.8466(19)                                                     |
| <i>b</i> [Å]                                   | 19.666(4)                                                      |
| <i>c</i> [Å]                                   | 21.194(4)                                                      |
| $\alpha$ [°]                                   | 69.437(5)                                                      |
| $\beta$ [°]                                    | 85.502(6)                                                      |
| $\gamma$ [°]                                   | 87.697(5)                                                      |
| Volume [Å <sup>3</sup> ]                       | 3830.3(12)                                                     |
| <i>Z</i>                                       | 2                                                              |
| $\rho_{\text{calc}}$ [gcm <sup>-3</sup> ]      | 1.333                                                          |
| $\mu$ [mm <sup>-1</sup> ]                      | 0.148                                                          |
| <i>F</i> (000)                                 | 1612                                                           |
| Radiation                                      | MoK $\alpha$ ( $\lambda$ =0.71073 Å)                           |
| 2 $\theta$ range [°]                           | 4.11 to 52.39 (0.81 Å)                                         |
| Index ranges                                   | -12 ≤ <i>h</i> ≤ 12, -24 ≤ <i>k</i> ≤ 24, -26 ≤ <i>l</i> ≤ 26  |
| Reflections collected                          | 74454                                                          |
| Independent reflections                        | 15361, $R_{\text{int}} = 0.1773$ , $R_{\text{sigma}} = 0.1535$ |
| Completeness to $\theta = 25.242^\circ$        | 99.9 %                                                         |
| Data / Restraints / Parameters                 | 15361/0/1018                                                   |
| Goodness-of-fit on $F^2$                       | 1.032                                                          |
| Final <i>R</i> indexes [ $I \geq 2\sigma(I)$ ] | $R_1 = 0.0781$ , $wR_2 = 0.1824$                               |
| Final <i>R</i> indexes [all data]              | $R_1 = 0.1675$ , $wR_2 = 0.2492$                               |
| Largest peak/hole [eÅ <sup>-3</sup> ]          | 0.50/-0.54                                                     |

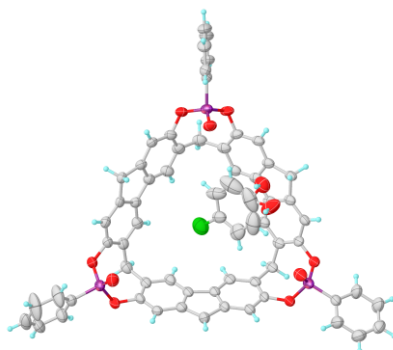

**Figure S17.** X-ray crystal structure of F[3]A1-[P(O)Ph]<sub>3</sub> with (G17) 4-chlorophenol

Thermal ellipsoids were shown at 50% probability level.

|                                                              |                                                                                |
|--------------------------------------------------------------|--------------------------------------------------------------------------------|
| CCDC number                                                  | 2330080                                                                        |
| Empirical formula                                            | C <sub>72</sub> H <sub>50</sub> Cl <sub>2</sub> O <sub>12</sub> P <sub>3</sub> |
| Formula weight                                               | 1261.86                                                                        |
| Temperature [K]                                              | 193.0                                                                          |
| Crystal system                                               | triclinic                                                                      |
| Space group (number)                                         | $P\bar{1}$ (2)                                                                 |
| <i>a</i> [Å]                                                 | 12.6751(13)                                                                    |
| <i>b</i> [Å]                                                 | 16.3436(14)                                                                    |
| <i>c</i> [Å]                                                 | 18.4284(18)                                                                    |
| $\alpha$ [°]                                                 | 65.171(3)                                                                      |
| $\beta$ [°]                                                  | 70.641(3)                                                                      |
| $\gamma$ [°]                                                 | 84.331(3)                                                                      |
| Volume [Å <sup>3</sup> ]                                     | 3265.2(5)                                                                      |
| <i>Z</i>                                                     | 2                                                                              |
| $\rho_{\text{calc}}$ [gcm <sup>-3</sup> ]                    | 1.283                                                                          |
| $\mu$ [mm <sup>-1</sup> ]                                    | 0.232                                                                          |
| <i>F</i> (000)                                               | 1305                                                                           |
| Radiation                                                    | MoK $\alpha$ ( $\lambda$ =0.71073 Å)                                           |
| 2 $\theta$ range [°]                                         | 4.28 to 55.30 (0.77 Å)                                                         |
| Index ranges                                                 | -16 ≤ <i>h</i> ≤ 16, -21 ≤ <i>k</i> ≤ 19, -23 ≤ <i>l</i> ≤ 23                  |
| Reflections collected                                        | 79447                                                                          |
| Independent reflections                                      | 15095, <i>R</i> <sub>int</sub> = 0.1418, <i>R</i> <sub>sigma</sub> = 0.0986    |
| Completeness to $\theta$ = 25.242°                           | 99.9 %                                                                         |
| Data / Restraints / Parameters                               | 15095/29/707                                                                   |
| Goodness-of-fit on <i>F</i> <sup>2</sup>                     | 1.016                                                                          |
| Final <i>R</i> indexes [ <i>I</i> ≥ 2 $\sigma$ ( <i>I</i> )] | <i>R</i> <sub>1</sub> = 0.0710, <i>wR</i> <sub>2</sub> = 0.1886                |
| Final <i>R</i> indexes [all data]                            | <i>R</i> <sub>1</sub> = 0.1467, <i>wR</i> <sub>2</sub> = 0.2468                |
| Largest peak/hole [eÅ <sup>-3</sup> ]                        | 1.11/-0.49                                                                     |

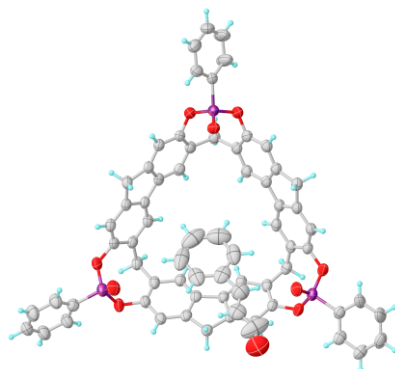

**Figure S18.** X-ray crystal structure of F[3]A1-[P(O)Ph]<sub>3</sub> with (G18) 3-phenylprop-2-enal

Thermal ellipsoids were shown at 50% probability level.

|                                                              |                                                                             |
|--------------------------------------------------------------|-----------------------------------------------------------------------------|
| CCDC number                                                  | 2330073                                                                     |
| Empirical formula                                            | C <sub>69</sub> H <sub>47</sub> O <sub>10</sub> P <sub>3</sub>              |
| Formula weight                                               | 1128.97                                                                     |
| Temperature [K]                                              | 193.00                                                                      |
| Crystal system                                               | triclinic                                                                   |
| Space group (number)                                         | $P\bar{1}$ (2)                                                              |
| <i>a</i> [Å]                                                 | 12.664(3)                                                                   |
| <i>b</i> [Å]                                                 | 15.602(4)                                                                   |
| <i>c</i> [Å]                                                 | 16.023(4)                                                                   |
| $\alpha$ [°]                                                 | 79.818(6)                                                                   |
| $\beta$ [°]                                                  | 87.132(6)                                                                   |
| $\gamma$ [°]                                                 | 81.471(6)                                                                   |
| Volume [Å <sup>3</sup> ]                                     | 3080.6(12)                                                                  |
| <i>Z</i>                                                     | 2                                                                           |
| $\rho_{\text{calc}}$ [gcm <sup>-3</sup> ]                    | 1.217                                                                       |
| $\mu$ [mm <sup>-1</sup> ]                                    | 0.154                                                                       |
| <i>F</i> (000)                                               | 1172                                                                        |
| Radiation                                                    | MoK $\alpha$ ( $\lambda$ =0.71073 Å)                                        |
| 2 $\theta$ range [°]                                         | 3.91 to 55.14 (0.77 Å)                                                      |
| Index ranges                                                 | -16 ≤ <i>h</i> ≤ 16, -20 ≤ <i>k</i> ≤ 20, -20 ≤ <i>l</i> ≤ 20               |
| Reflections collected                                        | 120046                                                                      |
| Independent reflections                                      | 14162, <i>R</i> <sub>int</sub> = 0.1561, <i>R</i> <sub>sigma</sub> = 0.0825 |
| Completeness to $\theta$ = 25.242°                           | 99.9 %                                                                      |
| Data / Restraints / Parameters                               | 14162/21/727                                                                |
| Goodness-of-fit on <i>F</i> <sup>2</sup>                     | 1.033                                                                       |
| Final <i>R</i> indexes [ <i>I</i> ≥ 2 $\sigma$ ( <i>I</i> )] | <i>R</i> <sub>1</sub> = 0.0671, <i>wR</i> <sub>2</sub> = 0.1757             |
| Final <i>R</i> indexes [all data]                            | <i>R</i> <sub>1</sub> = 0.1327, <i>wR</i> <sub>2</sub> = 0.2188             |
| Largest peak/hole [eÅ <sup>-3</sup> ]                        | 1.03/-0.55                                                                  |

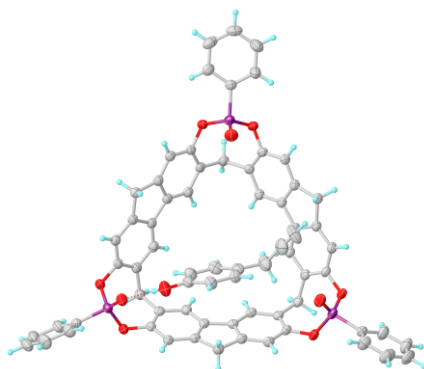

**Figure S19.** X-ray crystal structure of F[3]A1-[P(O)Ph]<sub>3</sub> with (G19) 4-(prop-2-ynyl)phenol

Thermal ellipsoids were shown at 50% probability level.

|                                                |                                                                                |
|------------------------------------------------|--------------------------------------------------------------------------------|
| CCDC number                                    | 2356657                                                                        |
| Empirical formula                              | C <sub>74</sub> H <sub>57</sub> Cl <sub>5</sub> O <sub>10</sub> P <sub>3</sub> |
| Formula weight                                 | 1376.35                                                                        |
| Temperature [K]                                | 193.0                                                                          |
| Crystal system                                 | triclinic                                                                      |
| Space group (number)                           | $P\bar{1}$ (2)                                                                 |
| <i>a</i> [Å]                                   | 9.1046(6)                                                                      |
| <i>b</i> [Å]                                   | 19.4136(11)                                                                    |
| <i>c</i> [Å]                                   | 19.7970(11)                                                                    |
| $\alpha$ [°]                                   | 104.993(2)                                                                     |
| $\beta$ [°]                                    | 96.273(3)                                                                      |
| $\gamma$ [°]                                   | 101.231(2)                                                                     |
| Volume [Å <sup>3</sup> ]                       | 3267.9(3)                                                                      |
| <i>Z</i>                                       | 2                                                                              |
| $\rho_{\text{calc}}$ [gcm <sup>-3</sup> ]      | 1.399                                                                          |
| $\mu$ [mm <sup>-1</sup> ]                      | 3.217                                                                          |
| <i>F</i> (000)                                 | 1422                                                                           |
| Radiation                                      | CuK $\alpha$ ( $\lambda$ =1.54178 Å)                                           |
| 2 $\theta$ range [°]                           | 4.69 to 136.49 (0.83 Å)                                                        |
| Index ranges                                   | -10 ≤ <i>h</i> ≤ 10, -23 ≤ <i>k</i> ≤ 23, -23 ≤ <i>l</i> ≤ 23                  |
| Reflections collected                          | 54935                                                                          |
| Independent reflections                        | 11902, $R_{\text{int}}$ = 0.0505, $R_{\text{sigma}}$ = 0.0376                  |
| Completeness to $\theta$ = 67.679°             | 99.8 %                                                                         |
| Data / Restraints / Parameters                 | 11902/33/740                                                                   |
| Goodness-of-fit on $F^2$                       | 1.067                                                                          |
| Final <i>R</i> indexes [ $I \geq 2\sigma(I)$ ] | $R_1$ = 0.0656, $wR_2$ = 0.1895                                                |
| Final <i>R</i> indexes [all data]              | $R_1$ = 0.0777, $wR_2$ = 0.1964                                                |
| Largest peak/hole [eÅ <sup>-3</sup> ]          | 1.35/-0.84                                                                     |

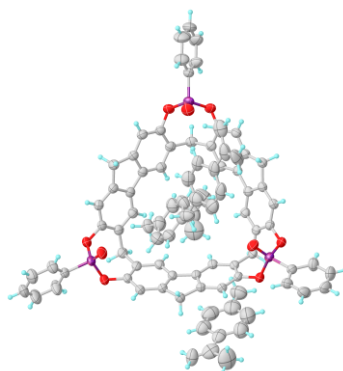

**Figure S20.** X-ray crystal structure of F[3]A1-[P(O)Ph]<sub>3</sub> with (G20) 2-(p-Methylphenyl)propene

Thermal ellipsoids were shown at 50% probability level.

|                                                              |                                                                             |
|--------------------------------------------------------------|-----------------------------------------------------------------------------|
| CCDC number                                                  | 2330066                                                                     |
| Empirical formula                                            | C <sub>95</sub> H <sub>81.5</sub> O <sub>9</sub> P <sub>3</sub>             |
| Formula weight                                               | 1460                                                                        |
| Temperature [K]                                              | 193.00                                                                      |
| Crystal system                                               | triclinic                                                                   |
| Space group (number)                                         | $P\bar{1}$ (2)                                                              |
| <i>a</i> [Å]                                                 | 14.110(3)                                                                   |
| <i>b</i> [Å]                                                 | 15.998(3)                                                                   |
| <i>c</i> [Å]                                                 | 18.215(4)                                                                   |
| $\alpha$ [°]                                                 | 69.252(9)                                                                   |
| $\beta$ [°]                                                  | 71.053(9)                                                                   |
| $\gamma$ [°]                                                 | 75.876(9)                                                                   |
| Volume [Å <sup>3</sup> ]                                     | 3597.9(13)                                                                  |
| <i>Z</i>                                                     | 2                                                                           |
| $\rho_{\text{calc}}$ [gcm <sup>-3</sup> ]                    | 1.348                                                                       |
| $\mu$ [mm <sup>-1</sup> ]                                    | 1.277                                                                       |
| <i>F</i> (000)                                               | 1537                                                                        |
| Radiation                                                    | CuK $\alpha$ ( $\lambda$ =1.54178 Å)                                        |
| 2 $\theta$ range [°]                                         | 5.38 to 133.19 (0.84 Å)                                                     |
| Index ranges                                                 | -16 ≤ <i>h</i> ≤ 16, -19 ≤ <i>k</i> ≤ 18, -21 ≤ <i>l</i> ≤ 21               |
| Reflections collected                                        | 55260                                                                       |
| Independent reflections                                      | 12542, <i>R</i> <sub>int</sub> = 0.0424, <i>R</i> <sub>sigma</sub> = 0.0365 |
| Completeness to $\theta$ = 66.595°                           | 98.7 %                                                                      |
| Data / Restraints / Parameters                               | 12542/24/830                                                                |
| Goodness-of-fit on <i>F</i> <sup>2</sup>                     | 1.052                                                                       |
| Final <i>R</i> indexes [ <i>I</i> ≥ 2 $\sigma$ ( <i>I</i> )] | <i>R</i> <sub>1</sub> = 0.0688, <i>wR</i> <sub>2</sub> = 0.2115             |
| Final <i>R</i> indexes [all data]                            | <i>R</i> <sub>1</sub> = 0.0784, <i>wR</i> <sub>2</sub> = 0.2194             |
| Largest peak/hole [eÅ <sup>-3</sup> ]                        | 1.26/-0.64                                                                  |

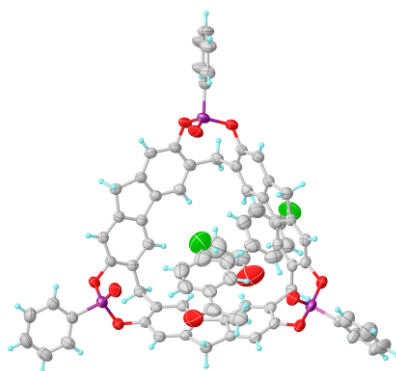

**Figure S21.** X-ray crystal structure of F[3]A1-[P(O)Ph]<sub>3</sub> with (G21) 4-fluoroacetophenone

Thermal ellipsoids were shown at 50% probability level.

|                                                |                                                                                     |
|------------------------------------------------|-------------------------------------------------------------------------------------|
| CCDC number                                    | 2330078                                                                             |
| Empirical formula                              | C <sub>88</sub> H <sub>63.5</sub> F <sub>3.5</sub> O <sub>12.5</sub> P <sub>3</sub> |
| Formula weight                                 | 1480.29                                                                             |
| Temperature [K]                                | 193.00                                                                              |
| Crystal system                                 | triclinic                                                                           |
| Space group (number)                           | $P\bar{1}$ (2)                                                                      |
| <i>a</i> [Å]                                   | 14.106(3)                                                                           |
| <i>b</i> [Å]                                   | 16.000(3)                                                                           |
| <i>c</i> [Å]                                   | 18.220(4)                                                                           |
| $\alpha$ [°]                                   | 69.246(9)                                                                           |
| $\beta$ [°]                                    | 71.087(10)                                                                          |
| $\gamma$ [°]                                   | 75.904(10)                                                                          |
| Volume [Å <sup>3</sup> ]                       | 3599.1(13)                                                                          |
| <i>Z</i>                                       | 2                                                                                   |
| $\rho_{\text{calc}}$ [gcm <sup>-3</sup> ]      | 1.366                                                                               |
| $\mu$ [mm <sup>-1</sup> ]                      | 1.397                                                                               |
| <i>F</i> (000)                                 | 1536                                                                                |
| Radiation                                      | CuK $\alpha$ ( $\lambda$ =1.54178 Å)                                                |
| 2 $\theta$ range [°]                           | 5.37 to 137.52 (0.83 Å)                                                             |
| Index ranges                                   | -17 ≤ <i>h</i> ≤ 16, -19 ≤ <i>k</i> ≤ 19, -21 ≤ <i>l</i> ≤ 21                       |
| Reflections collected                          | 57018                                                                               |
| Independent reflections                        | 13124, $R_{\text{int}}$ = 0.0422, $R_{\text{sigma}}$ = 0.0369                       |
| Completeness to $\theta$ = 67.679°             | 99.4 %                                                                              |
| Data / Restraints / Parameters                 | 13124/34/831                                                                        |
| Goodness-of-fit on $F^2$                       | 1.034                                                                               |
| Final <i>R</i> indexes [ $I \geq 2\sigma(I)$ ] | $R_1$ = 0.0451, $wR_2$ = 0.1256                                                     |
| Final <i>R</i> indexes [all data]              | $R_1$ = 0.0519, $wR_2$ = 0.1290                                                     |
| Largest peak/hole [eÅ <sup>-3</sup> ]          | 0.38/-0.35                                                                          |

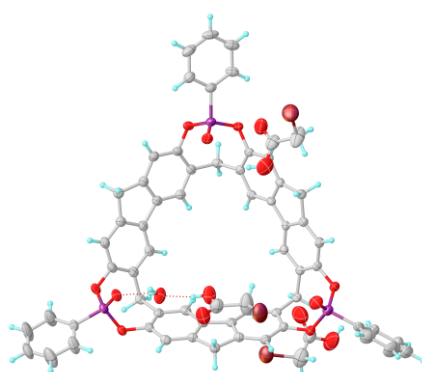

**Figure S22.** X-ray crystal structure of **F[3]A1-[P(O)Ph]<sub>3</sub>** with **(G22) bromoacetic acid**

Thermal ellipsoids were shown at 50% probability level.

|                                                                   |                                                                                             |
|-------------------------------------------------------------------|---------------------------------------------------------------------------------------------|
| CCDC number                                                       | 2356658                                                                                     |
| Empirical formula                                                 | C <sub>70</sub> H <sub>59.84</sub> Br <sub>5</sub> O <sub>22</sub> P <sub>3</sub>           |
| Formula weight                                                    | 1745.48                                                                                     |
| Temperature [K]                                                   | 193.0                                                                                       |
| Crystal system                                                    | triclinic                                                                                   |
| Space group (number)                                              | <i>P</i> $\bar{1}$ (2)                                                                      |
| <i>a</i> [Å]                                                      | 14.5256(5)                                                                                  |
| <i>b</i> [Å]                                                      | 16.3572(5)                                                                                  |
| <i>c</i> [Å]                                                      | 17.4590(6)                                                                                  |
| $\alpha$ [°]                                                      | 67.275(2)                                                                                   |
| $\beta$ [°]                                                       | 72.659(2)                                                                                   |
| $\gamma$ [°]                                                      | 67.045(2)                                                                                   |
| Volume [Å <sup>3</sup> ]                                          | 3469.7(2)                                                                                   |
| <i>Z</i>                                                          | 2                                                                                           |
| $\rho_{\text{calc}}$ [gcm <sup>-3</sup> ]                         | 1.671                                                                                       |
| $\mu$ [mm <sup>-1</sup> ]                                         | 4.822                                                                                       |
| <i>F</i> (000)                                                    | 1752                                                                                        |
| Radiation                                                         | CuK $\alpha$ ( $\lambda$ =1.54178 Å)                                                        |
| 2 $\theta$ range [°]                                              | 5.57 to 136.48 (0.83 Å)                                                                     |
| Index ranges                                                      | -17 $\leq$ <i>h</i> $\leq$ 17, -19 $\leq$ <i>k</i> $\leq$ 19, -20 $\leq$ <i>l</i> $\leq$ 21 |
| Reflections collected                                             | 50871                                                                                       |
| Independent reflections                                           | 12621, <i>R</i> <sub>int</sub> = 0.0489, <i>R</i> <sub>sigma</sub> = 0.0411                 |
| Completeness to $\theta$ = 67.679°                                | 99.6 %                                                                                      |
| Data / Restraints / Parameters                                    | 12621/2/797                                                                                 |
| Goodness-of-fit on <i>F</i> <sup>2</sup>                          | 1.053                                                                                       |
| Final <i>R</i> indexes [ <i>I</i> $\geq$ 2 $\sigma$ ( <i>I</i> )] | <i>R</i> <sub>1</sub> = 0.0716, <i>wR</i> <sub>2</sub> = 0.2121                             |
| Final <i>R</i> indexes [all data]                                 | <i>R</i> <sub>1</sub> = 0.0832, <i>wR</i> <sub>2</sub> = 0.2196                             |
| Largest peak/hole [eÅ <sup>-3</sup> ]                             | 1.34/-1.91                                                                                  |



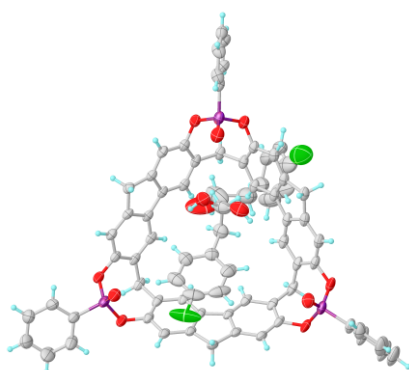

**Figure S23.** X-ray crystal structure of F[3]A1-[P(O)Ph]<sub>3</sub> with (G23) 4-fluorophenethyl alcohol

Thermal ellipsoids were shown at 50% probability level.

|                                                |                                                                               |
|------------------------------------------------|-------------------------------------------------------------------------------|
| CCDC number                                    | 2356643                                                                       |
| Empirical formula                              | C <sub>84</sub> H <sub>67</sub> F <sub>3</sub> O <sub>13</sub> P <sub>3</sub> |
| Formula weight                                 | 1433.11                                                                       |
| Temperature [K]                                | 193.0                                                                         |
| Crystal system                                 | triclinic                                                                     |
| Space group (number)                           | $P\bar{1}$ (2)                                                                |
| <i>a</i> [Å]                                   | 14.2667(4)                                                                    |
| <i>b</i> [Å]                                   | 16.6495(5)                                                                    |
| <i>c</i> [Å]                                   | 16.6960(5)                                                                    |
| $\alpha$ [°]                                   | 67.7370(10)                                                                   |
| $\beta$ [°]                                    | 74.097(2)                                                                     |
| $\gamma$ [°]                                   | 74.823(2)                                                                     |
| Volume [Å <sup>3</sup> ]                       | 3473.70(18)                                                                   |
| <i>Z</i>                                       | 2                                                                             |
| $\rho_{\text{calc}}$ [gcm <sup>-3</sup> ]      | 1.371                                                                         |
| $\mu$ [mm <sup>-1</sup> ]                      | 1.421                                                                         |
| <i>F</i> (000)                                 | 1493                                                                          |
| Radiation                                      | CuK $\alpha$ ( $\lambda$ =1.54178 Å)                                          |
| 2 $\theta$ range [°]                           | 5.83 to 136.49 (0.83 Å)                                                       |
| Index ranges                                   | -17 ≤ <i>h</i> ≤ 17, -20 ≤ <i>k</i> ≤ 20, -19 ≤ <i>l</i> ≤ 20                 |
| Reflections collected                          | 52085                                                                         |
| Independent reflections                        | 12690, $R_{\text{int}} = 0.0575$ , $R_{\text{sigma}} = 0.0584$                |
| Completeness to $\theta = 67.679^\circ$        | 99.9 %                                                                        |
| Data / Restraints / Parameters                 | 12690/23/840                                                                  |
| Goodness-of-fit on $F^2$                       | 1.059                                                                         |
| Final <i>R</i> indexes [ $I \geq 2\sigma(I)$ ] | $R_1 = 0.0658$ , $wR_2 = 0.1783$                                              |
| Final <i>R</i> indexes [all data]              | $R_1 = 0.0957$ , $wR_2 = 0.1903$                                              |
| Largest peak/hole [eÅ <sup>-3</sup> ]          | 1.15/-0.67                                                                    |

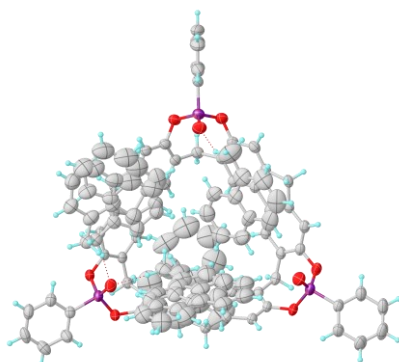

**Figure S24.** X-ray crystal structure of F[3]A1-[P(O)Ph]<sub>3</sub> with (G24) 1-methylnaphthalene

Thermal ellipsoids were shown at 50% probability level.

|                                                |                                                                                 |
|------------------------------------------------|---------------------------------------------------------------------------------|
| CCDC number                                    | 2330068                                                                         |
| Empirical formula                              | C <sub>105</sub> H <sub>75</sub> N <sub>4.5</sub> O <sub>9</sub> P <sub>3</sub> |
| Formula weight                                 | 1636.12                                                                         |
| Temperature [K]                                | 193.0                                                                           |
| Crystal system                                 | triclinic                                                                       |
| Space group (number)                           | $P\bar{1}$ (2)                                                                  |
| <i>a</i> [Å]                                   | 14.9533(8)                                                                      |
| <i>b</i> [Å]                                   | 17.3114(10)                                                                     |
| <i>c</i> [Å]                                   | 19.1689(11)                                                                     |
| $\alpha$ [°]                                   | 66.900(2)                                                                       |
| $\beta$ [°]                                    | 69.827(2)                                                                       |
| $\gamma$ [°]                                   | 73.481(2)                                                                       |
| Volume [Å <sup>3</sup> ]                       | 4220.0(4)                                                                       |
| <i>Z</i>                                       | 2                                                                               |
| $\rho_{\text{calc}}$ [gcm <sup>-3</sup> ]      | 1.288                                                                           |
| $\mu$ [mm <sup>-1</sup> ]                      | 0.136                                                                           |
| <i>F</i> (000)                                 | 1706                                                                            |
| Radiation                                      | MoK $\alpha$ ( $\lambda$ =0.71073 Å)                                            |
| 2 $\theta$ range [°]                           | 4.07 to 55.00 (0.77 Å)                                                          |
| Index ranges                                   | -19 ≤ <i>h</i> ≤ 19, -22 ≤ <i>k</i> ≤ 22, -24 ≤ <i>l</i> ≤ 24                   |
| Reflections collected                          | 103080                                                                          |
| Independent reflections                        | 19288, $R_{\text{int}} = 0.1202$ , $R_{\text{sigma}} = 0.0755$                  |
| Completeness to $\theta = 25.242^\circ$        | 99.9 %                                                                          |
| Data / Restraints / Parameters                 | 19288/37/724                                                                    |
| Goodness-of-fit on $F^2$                       | 1.032                                                                           |
| Final <i>R</i> indexes [ $I \geq 2\sigma(I)$ ] | $R_1 = 0.0772$ , $wR_2 = 0.2117$                                                |
| Final <i>R</i> indexes [all data]              | $R_1 = 0.1279$ , $wR_2 = 0.2606$                                                |
| Largest peak/hole [eÅ <sup>-3</sup> ]          | 1.27/-0.66                                                                      |

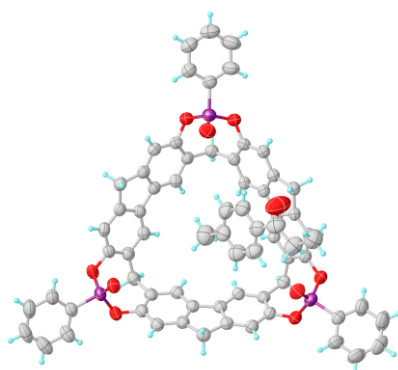

**Figure S25.** X-ray crystal structure of F[3]A1-[P(O)Ph]<sub>3</sub> with (G25) 4-methylpropiophenone

Thermal ellipsoids were shown at 50% probability level.

|                                                                   |                                                                             |
|-------------------------------------------------------------------|-----------------------------------------------------------------------------|
| CCDC number                                                       | 2330060                                                                     |
| Empirical formula                                                 | C <sub>70</sub> H <sub>53</sub> O <sub>11</sub> P <sub>3</sub>              |
| Formula weight                                                    | 1163.02                                                                     |
| Temperature [K]                                                   | 193.00                                                                      |
| Crystal system                                                    | triclinic                                                                   |
| Space group (number)                                              | <i>P</i> $\bar{1}$ (2)                                                      |
| <i>a</i> [Å]                                                      | 11.7390(5)                                                                  |
| <i>b</i> [Å]                                                      | 16.0204(6)                                                                  |
| <i>c</i> [Å]                                                      | 17.1979(7)                                                                  |
| $\alpha$ [°]                                                      | 80.920(2)                                                                   |
| $\beta$ [°]                                                       | 84.697(3)                                                                   |
| $\gamma$ [°]                                                      | 76.830(2)                                                                   |
| Volume [Å <sup>3</sup> ]                                          | 3104.4(2)                                                                   |
| <i>Z</i>                                                          | 2                                                                           |
| $\rho_{\text{calc}}$ [gcm <sup>-3</sup> ]                         | 1.244                                                                       |
| $\mu$ [mm <sup>-1</sup> ]                                         | 1.373                                                                       |
| <i>F</i> (000)                                                    | 1212                                                                        |
| Radiation                                                         | CuK $\alpha$ ( $\lambda$ =1.54178 Å)                                        |
| 2 $\theta$ range [°]                                              | 5.21 to 136.91 (0.83 Å)                                                     |
| Index ranges                                                      | -14 $\leq$ h $\leq$ 14, -19 $\leq$ k $\leq$ 16, -18 $\leq$ l $\leq$ 20      |
| Reflections collected                                             | 33673                                                                       |
| Independent reflections                                           | 10964, <i>R</i> <sub>int</sub> = 0.0854, <i>R</i> <sub>sigma</sub> = 0.0964 |
| Completeness to $\theta$ = 67.679°                                | 96.8 %                                                                      |
| Data / Restraints / Parameters                                    | 10964/0/750                                                                 |
| Goodness-of-fit on <i>F</i> <sup>2</sup>                          | 1.088                                                                       |
| Final <i>R</i> indexes [ <i>I</i> $\geq$ 2 $\sigma$ ( <i>I</i> )] | <i>R</i> <sub>1</sub> = 0.0697, <i>wR</i> <sub>2</sub> = 0.1992             |
| Final <i>R</i> indexes [all data]                                 | <i>R</i> <sub>1</sub> = 0.1206, <i>wR</i> <sub>2</sub> = 0.2239             |
| Largest peak/hole [eÅ <sup>-3</sup> ]                             | 0.28/-0.49                                                                  |

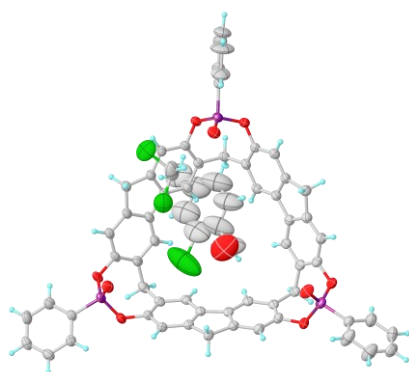

**Figure S26.** X-ray crystal structure of **F[3]A1-[P(O)Ph]<sub>3</sub>** with **(G26) 2-chloro-4-methylbenzaldehyde**

Thermal ellipsoids were shown at 50% probability level.

|                                                              |                                                                                |
|--------------------------------------------------------------|--------------------------------------------------------------------------------|
| CCDC number                                                  | 2330075                                                                        |
| Empirical formula                                            | C <sub>69</sub> H <sub>48</sub> Cl <sub>3</sub> O <sub>10</sub> P <sub>3</sub> |
| Formula weight                                               | 1236.33                                                                        |
| Temperature [K]                                              | 193.0                                                                          |
| Crystal system                                               | monoclinic                                                                     |
| Space group (number)                                         | <i>P</i> 2 <sub>1</sub> / <i>n</i> (14)                                        |
| <i>a</i> [Å]                                                 | 15.5402(3)                                                                     |
| <i>b</i> [Å]                                                 | 20.7308(4)                                                                     |
| <i>c</i> [Å]                                                 | 18.9595(4)                                                                     |
| $\alpha$ [°]                                                 | 90                                                                             |
| $\beta$ [°]                                                  | 102.5440(10)                                                                   |
| $\gamma$ [°]                                                 | 90                                                                             |
| Volume [Å <sup>3</sup> ]                                     | 5962.2(2)                                                                      |
| <i>Z</i>                                                     | 4                                                                              |
| $\rho_{\text{calc}}$ [gcm <sup>-3</sup> ]                    | 1.377                                                                          |
| $\mu$ [mm <sup>-1</sup> ]                                    | 2.659                                                                          |
| <i>F</i> (000)                                               | 2552                                                                           |
| Radiation                                                    | CuK $\alpha$ ( $\lambda$ =1.54178 Å)                                           |
| 2 $\theta$ range [°]                                         | 6.68 to 136.70 (0.83 Å)                                                        |
| Index ranges                                                 | -18 ≤ <i>h</i> ≤ 18, -24 ≤ <i>k</i> ≤ 24, -22 ≤ <i>l</i> ≤ 22                  |
| Reflections collected                                        | 86354                                                                          |
| Independent reflections                                      | 10907, <i>R</i> <sub>int</sub> = 0.0620, <i>R</i> <sub>sigma</sub> = 0.0312    |
| Completeness to $\theta$ = 67.679°                           | 99.9 %                                                                         |
| Data / Restraints / Parameters                               | 10907/41/755                                                                   |
| Goodness-of-fit on <i>F</i> <sup>2</sup>                     | 1.079                                                                          |
| Final <i>R</i> indexes [ <i>I</i> ≥ 2 $\sigma$ ( <i>I</i> )] | <i>R</i> <sub>1</sub> = 0.0725, <i>wR</i> <sub>2</sub> = 0.2162                |
| Final <i>R</i> indexes [all data]                            | <i>R</i> <sub>1</sub> = 0.0855, <i>wR</i> <sub>2</sub> = 0.2299                |
| Largest peak/hole [eÅ <sup>-3</sup> ]                        | 1.18/-0.94                                                                     |

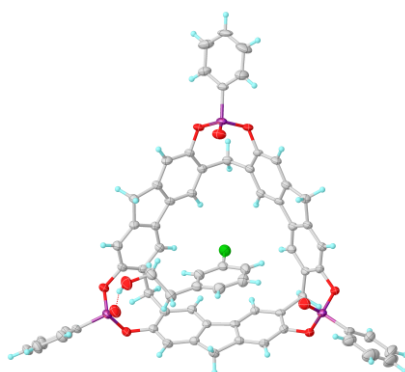

**Figure S27.** X-ray crystal structure of F[3]A1-[P(O)Ph]<sub>3</sub> with (G27) 3-chlorophenethyl alcohol

Thermal ellipsoids were shown at 50% probability level.

|                                                |                                                                                   |
|------------------------------------------------|-----------------------------------------------------------------------------------|
| CCDC number                                    | 2356645                                                                           |
| Empirical formula                              | C <sub>146</sub> H <sub>116</sub> Cl <sub>12</sub> O <sub>20</sub> P <sub>6</sub> |
| Formula weight                                 | 2801.84                                                                           |
| Temperature [K]                                | 193.00                                                                            |
| Crystal system                                 | triclinic                                                                         |
| Space group (number)                           | $P\bar{1}$ (2)                                                                    |
| <i>a</i> [Å]                                   | 18.9066(5)                                                                        |
| <i>b</i> [Å]                                   | 19.4901(5)                                                                        |
| <i>c</i> [Å]                                   | 21.9910(6)                                                                        |
| $\alpha$ [°]                                   | 71.010(2)                                                                         |
| $\beta$ [°]                                    | 89.114(2)                                                                         |
| $\gamma$ [°]                                   | 86.945(2)                                                                         |
| Volume [Å <sup>3</sup> ]                       | 7651.6(4)                                                                         |
| <i>Z</i>                                       | 2                                                                                 |
| $\rho_{\text{calc}}$ [gcm <sup>-3</sup> ]      | 1.216                                                                             |
| $\mu$ [mm <sup>-1</sup> ]                      | 3.070                                                                             |
| <i>F</i> (000)                                 | 2892                                                                              |
| Radiation                                      | CuK $\alpha$ ( $\lambda$ =1.54178 Å)                                              |
| 2 $\theta$ range [°]                           | 4.25 to 136.88 (0.83 Å)                                                           |
| Index ranges                                   | -21 ≤ <i>h</i> ≤ 22, -23 ≤ <i>k</i> ≤ 23, -26 ≤ <i>l</i> ≤ 26                     |
| Reflections collected                          | 106068                                                                            |
| Independent reflections                        | 27971, $R_{\text{int}} = 0.0778$ , $R_{\text{sigma}} = 0.0658$                    |
| Completeness to $\theta = 67.679^\circ$        | 99.8 %                                                                            |
| Data / Restraints / Parameters                 | 27971/17/1479                                                                     |
| Goodness-of-fit on $F^2$                       | 1.075                                                                             |
| Final <i>R</i> indexes [ $I \geq 2\sigma(I)$ ] | $R_1 = 0.0775$ , $wR_2 = 0.2207$                                                  |
| Final <i>R</i> indexes [all data]              | $R_1 = 0.1113$ , $wR_2 = 0.2475$                                                  |
| Largest peak/hole [eÅ <sup>-3</sup> ]          | 1.58/-1.04                                                                        |

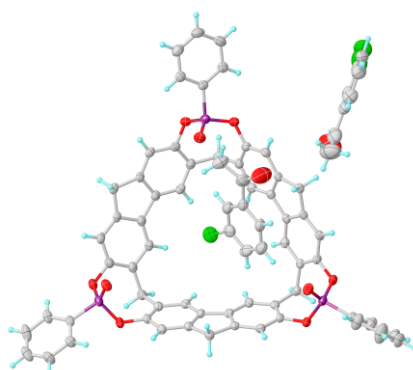

**Figure S28.** X-ray crystal structure of F[3]A1-[P(O)Ph]<sub>3</sub> with (G28) 3-chloroacetophenone

Thermal ellipsoids were shown at 50% probability level.

|                                                |                                                                                |
|------------------------------------------------|--------------------------------------------------------------------------------|
| CCDC number                                    | 2330076                                                                        |
| Empirical formula                              | C <sub>76</sub> H <sub>53</sub> Cl <sub>2</sub> O <sub>11</sub> P <sub>3</sub> |
| Formula weight                                 | 1305.99                                                                        |
| Temperature [K]                                | 200.00                                                                         |
| Crystal system                                 | triclinic                                                                      |
| Space group (number)                           | $P\bar{1}$ (2)                                                                 |
| <i>a</i> [Å]                                   | 13.5554(7)                                                                     |
| <i>b</i> [Å]                                   | 14.7207(9)                                                                     |
| <i>c</i> [Å]                                   | 16.5017(7)                                                                     |
| $\alpha$ [°]                                   | 74.173(2)                                                                      |
| $\beta$ [°]                                    | 82.141(2)                                                                      |
| $\gamma$ [°]                                   | 74.909(2)                                                                      |
| Volume [Å <sup>3</sup> ]                       | 3051.1(3)                                                                      |
| <i>Z</i>                                       | 2                                                                              |
| $\rho_{\text{calc}}$ [gcm <sup>-3</sup> ]      | 1.422                                                                          |
| $\mu$ [mm <sup>-1</sup> ]                      | 0.252                                                                          |
| <i>F</i> (000)                                 | 1352                                                                           |
| Radiation                                      | MoK $\alpha$ ( $\lambda$ =0.71073 Å)                                           |
| 2 $\theta$ range [°]                           | 3.90 to 54.99 (0.77 Å)                                                         |
| Index ranges                                   | -17 ≤ <i>h</i> ≤ 17, -19 ≤ <i>k</i> ≤ 19, -20 ≤ <i>l</i> ≤ 21                  |
| Reflections collected                          | 108099                                                                         |
| Independent reflections                        | 13990, $R_{\text{int}}$ = 0.1743, $R_{\text{sigma}}$ = 0.0808                  |
| Completeness to $\theta$ = 25.242°             | 99.9 %                                                                         |
| Data / Restraints / Parameters                 | 13990/7/841                                                                    |
| Goodness-of-fit on $F^2$                       | 1.039                                                                          |
| Final <i>R</i> indexes [ $I \geq 2\sigma(I)$ ] | $R_1$ = 0.0556, $wR_2$ = 0.1378                                                |
| Final <i>R</i> indexes [all data]              | $R_1$ = 0.1044, $wR_2$ = 0.1636                                                |
| Largest peak/hole [eÅ <sup>-3</sup> ]          | 0.55/-0.43                                                                     |

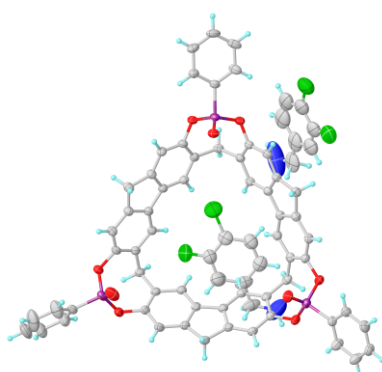

**Figure S29.** X-ray crystal structure of **F[3]A1-[P(O)Ph]<sub>3</sub>** with **(G29) 4-chloro-3-fluorobenzylamine**

Thermal ellipsoids were shown at 50% probability level.

|                                                |                                                                                                              |
|------------------------------------------------|--------------------------------------------------------------------------------------------------------------|
| CCDC number                                    | 2359297                                                                                                      |
| Empirical formula                              | C <sub>81</sub> H <sub>61</sub> Cl <sub>3</sub> F <sub>3</sub> N <sub>3</sub> O <sub>10</sub> P <sub>3</sub> |
| Formula weight                                 | 1493                                                                                                         |
| Temperature [K]                                | 193.0                                                                                                        |
| Crystal system                                 | triclinic                                                                                                    |
| Space group (number)                           | $P\bar{1}$ (2)                                                                                               |
| <i>a</i> [Å]                                   | 13.5682(3)                                                                                                   |
| <i>b</i> [Å]                                   | 14.6203(3)                                                                                                   |
| <i>c</i> [Å]                                   | 18.9481(4)                                                                                                   |
| $\alpha$ [°]                                   | 74.0480(10)                                                                                                  |
| $\beta$ [°]                                    | 73.7440(10)                                                                                                  |
| $\gamma$ [°]                                   | 80.8830(10)                                                                                                  |
| Volume [Å <sup>3</sup> ]                       | 3455.97(13)                                                                                                  |
| <i>Z</i>                                       | 2                                                                                                            |
| $\rho_{\text{calc}}$ [gcm <sup>-3</sup> ]      | 1.431                                                                                                        |
| $\mu$ [mm <sup>-1</sup> ]                      | 2.473                                                                                                        |
| <i>F</i> (000)                                 | 1536                                                                                                         |
| Radiation                                      | CuK $\alpha$ ( $\lambda$ =1.54178 Å)                                                                         |
| 2 $\theta$ range [°]                           | 5.01 to 136.43 (0.83 Å)                                                                                      |
| Index ranges                                   | -16 ≤ <i>h</i> ≤ 16, -17 ≤ <i>k</i> ≤ 17, -22 ≤ <i>l</i> ≤ 22                                                |
| Reflections collected                          | 41610                                                                                                        |
| Independent reflections                        | 12546, $R_{\text{int}}$ = 0.0363, $R_{\text{sigma}}$ = 0.0328                                                |
| Completeness to $\theta$ = 67.679°             | 99.3 %                                                                                                       |
| Data / Restraints / Parameters                 | 12546/34/829                                                                                                 |
| Goodness-of-fit on $F^2$                       | 1.045                                                                                                        |
| Final <i>R</i> indexes [ $I \geq 2\sigma(I)$ ] | $R_1$ = 0.0713, $wR_2$ = 0.2160                                                                              |
| Final <i>R</i> indexes [all data]              | $R_1$ = 0.0818, $wR_2$ = 0.2250                                                                              |
| Largest peak/hole [eÅ <sup>-3</sup> ]          | 1.54/-1.25                                                                                                   |

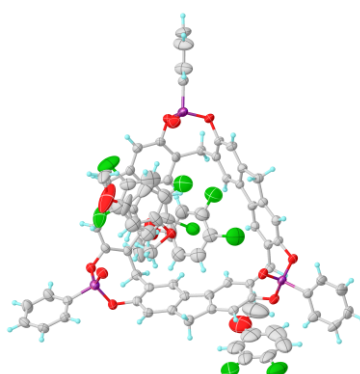

**Figure S30.** X-ray crystal structure of **F[3]A1-[P(O)Ph]<sub>3</sub>** with **(G30) 4-chloro-3-fluoroanisole**

Thermal ellipsoids were shown at 50% probability level.

|                                                |                                                                                               |
|------------------------------------------------|-----------------------------------------------------------------------------------------------|
| CCDC number                                    | 2356646                                                                                       |
| Empirical formula                              | C <sub>81</sub> H <sub>59</sub> Cl <sub>3</sub> F <sub>3</sub> O <sub>13</sub> P <sub>3</sub> |
| Formula weight                                 | 1496.52                                                                                       |
| Temperature [K]                                | 193.0                                                                                         |
| Crystal system                                 | triclinic                                                                                     |
| Space group (number)                           | $P\bar{1}$ (2)                                                                                |
| <i>a</i> [Å]                                   | 13.5831(11)                                                                                   |
| <i>b</i> [Å]                                   | 14.6115(10)                                                                                   |
| <i>c</i> [Å]                                   | 18.9586(15)                                                                                   |
| $\alpha$ [°]                                   | 74.170(3)                                                                                     |
| $\beta$ [°]                                    | 73.795(3)                                                                                     |
| $\gamma$ [°]                                   | 80.974(3)                                                                                     |
| Volume [Å <sup>3</sup> ]                       | 3462.9(5)                                                                                     |
| <i>Z</i>                                       | 2                                                                                             |
| $\rho_{\text{calc}}$ [gcm <sup>-3</sup> ]      | 1.435                                                                                         |
| $\mu$ [mm <sup>-1</sup> ]                      | 0.278                                                                                         |
| <i>F</i> (000)                                 | 1544                                                                                          |
| Radiation                                      | MoK $\alpha$ ( $\lambda$ =0.71073 Å)                                                          |
| 2 $\theta$ range [°]                           | 2.31 to 55.19 (0.77 Å)                                                                        |
| Index ranges                                   | -17 $\leq$ <i>h</i> $\leq$ 17, -17 $\leq$ <i>k</i> $\leq$ 19, -24 $\leq$ <i>l</i> $\leq$ 24   |
| Reflections collected                          | 136387                                                                                        |
| Independent reflections                        | 15886, $R_{\text{int}}$ = 0.1713, $R_{\text{sigma}}$ = 0.0931                                 |
| Completeness to $\theta$ = 25.242°             | 99.9 %                                                                                        |
| Data / Restraints / Parameters                 | 15886/27/982                                                                                  |
| Goodness-of-fit on $F^2$                       | 1.024                                                                                         |
| Final <i>R</i> indexes [ $I \geq 2\sigma(I)$ ] | $R_1$ = 0.1002, $wR_2$ = 0.2308                                                               |
| Final <i>R</i> indexes [all data]              | $R_1$ = 0.1831, $wR_2$ = 0.3069                                                               |
| Largest peak/hole [eÅ <sup>-3</sup> ]          | 1.37/-0.80                                                                                    |



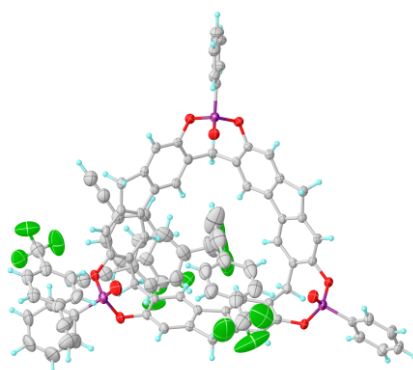

**Figure S31.** X-ray crystal structure of F[3]A1-[P(O)Ph]<sub>3</sub> with (G31) 4-(trifluoromethyl)phenylacetylene

Thermal ellipsoids were shown at 50% probability level.

|                                                |                                                                                  |
|------------------------------------------------|----------------------------------------------------------------------------------|
| CCDC number                                    | 2330072                                                                          |
| Empirical formula                              | C <sub>156</sub> H <sub>100</sub> F <sub>12</sub> O <sub>19</sub> P <sub>6</sub> |
| Formula weight                                 | 2692.16                                                                          |
| Temperature [K]                                | 193.15                                                                           |
| Crystal system                                 | triclinic                                                                        |
| Space group (number)                           | $P\bar{1}$ (2)                                                                   |
| <i>a</i> [Å]                                   | 15.313(7)                                                                        |
| <i>b</i> [Å]                                   | 19.519(10)                                                                       |
| <i>c</i> [Å]                                   | 22.918(15)                                                                       |
| $\alpha$ [°]                                   | 85.77(2)                                                                         |
| $\beta$ [°]                                    | 71.15(3)                                                                         |
| $\gamma$ [°]                                   | 89.82(2)                                                                         |
| Volume [Å <sup>3</sup> ]                       | 6463(6)                                                                          |
| <i>Z</i>                                       | 2                                                                                |
| $\rho_{\text{calc}}$ [gcm <sup>-3</sup> ]      | 1.383                                                                            |
| $\mu$ [mm <sup>-1</sup> ]                      | 1.520                                                                            |
| <i>F</i> (000)                                 | 2772                                                                             |
| Radiation                                      | CuK $\alpha$ ( $\lambda$ =1.54178 Å)                                             |
| 2 $\theta$ range [°]                           | 4.09 to 136.95 (0.83 Å)                                                          |
| Index ranges                                   | -18 ≤ <i>h</i> ≤ 18, -23 ≤ <i>k</i> ≤ 23, -27 ≤ <i>l</i> ≤ 27                    |
| Reflections collected                          | 111673                                                                           |
| Independent reflections                        | 23379, $R_{\text{int}} = 0.1061$ , $R_{\text{sigma}} = 0.0949$                   |
| Completeness to $\theta = 67.679^\circ$        | 98.7 %                                                                           |
| Data / Restraints / Parameters                 | 23379/26/1741                                                                    |
| Goodness-of-fit on $F^2$                       | 1.043                                                                            |
| Final <i>R</i> indexes [ $I \geq 2\sigma(I)$ ] | $R_1 = 0.0512$ , $wR_2 = 0.1368$                                                 |
| Final <i>R</i> indexes [all data]              | $R_1 = 0.0979$ , $wR_2 = 0.1525$                                                 |
| Largest peak/hole [eÅ <sup>-3</sup> ]          | 1.34/-0.44                                                                       |

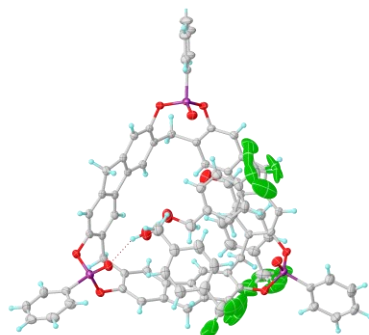

**Figure S32.** X-ray crystal structure of F[3]A1-[P(O)Ph]<sub>3</sub> with (G32) 4-(trifluoromethyl)benzyl alcohol

Thermal ellipsoids were shown at 50% probability level.

|                                                |                                                                               |
|------------------------------------------------|-------------------------------------------------------------------------------|
| CCDC number                                    | 2330059                                                                       |
| Empirical formula                              | C <sub>84</sub> H <sub>60</sub> F <sub>9</sub> O <sub>12</sub> P <sub>3</sub> |
| Formula weight                                 | 1525.23                                                                       |
| Temperature [K]                                | 193.0                                                                         |
| Crystal system                                 | triclinic                                                                     |
| Space group (number)                           | $P\bar{1}$ (2)                                                                |
| <i>a</i> [Å]                                   | 10.9487(5)                                                                    |
| <i>b</i> [Å]                                   | 18.1314(9)                                                                    |
| <i>c</i> [Å]                                   | 19.7308(9)                                                                    |
| $\alpha$ [°]                                   | 68.2040(10)                                                                   |
| $\beta$ [°]                                    | 78.033(2)                                                                     |
| $\gamma$ [°]                                   | 79.738(2)                                                                     |
| Volume [Å <sup>3</sup> ]                       | 3535.7(3)                                                                     |
| <i>Z</i>                                       | 2                                                                             |
| $\rho_{\text{calc}}$ [gcm <sup>-3</sup> ]      | 1.433                                                                         |
| $\mu$ [mm <sup>-1</sup> ]                      | 0.998                                                                         |
| <i>F</i> (000)                                 | 1572                                                                          |
| Radiation                                      | GaK $\alpha$ ( $\lambda$ =1.34139 Å)                                          |
| 2 $\theta$ range [°]                           | 4.25 to 108.00 (0.83 Å)                                                       |
| Index ranges                                   | -13 ≤ <i>h</i> ≤ 13, -21 ≤ <i>k</i> ≤ 21, -22 ≤ <i>l</i> ≤ 23                 |
| Reflections collected                          | 41743                                                                         |
| Independent reflections                        | 12772, $R_{\text{int}}$ = 0.0427, $R_{\text{sigma}}$ = 0.0381                 |
| Completeness to $\theta$ = 53.594°             | 98.2 %                                                                        |
| Data / Restraints / Parameters                 | 12772/12/1056                                                                 |
| Goodness-of-fit on $F^2$                       | 1.023                                                                         |
| Final <i>R</i> indexes [ $I \geq 2\sigma(I)$ ] | $R_1$ = 0.0387, $wR_2$ = 0.1018                                               |
| Final <i>R</i> indexes [all data]              | $R_1$ = 0.0408, $wR_2$ = 0.1034                                               |
| Largest peak/hole [eÅ <sup>-3</sup> ]          | 0.25/-0.37                                                                    |

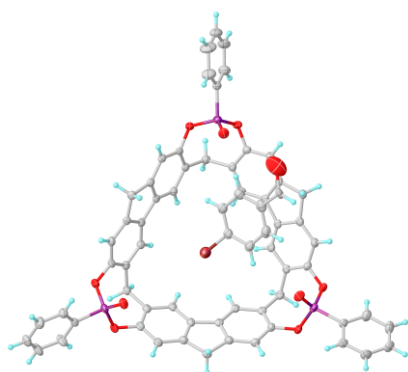

**Figure S33.** X-ray crystal structure of F[3]A1-[P(O)Ph]<sub>3</sub> with (G33) 4-bromobenzaldehyde

Thermal ellipsoids were shown at 50% probability level.

|                                                |                                                                                |
|------------------------------------------------|--------------------------------------------------------------------------------|
| CCDC number                                    | 2356659                                                                        |
| Empirical formula                              | C <sub>74</sub> H <sub>49</sub> Br <sub>2</sub> O <sub>11</sub> P <sub>3</sub> |
| Formula weight                                 | 1366.84                                                                        |
| Temperature [K]                                | 193.15                                                                         |
| Crystal system                                 | triclinic                                                                      |
| Space group (number)                           | $P\bar{1}$ (2)                                                                 |
| <i>a</i> [Å]                                   | 13.6016(9)                                                                     |
| <i>b</i> [Å]                                   | 15.1897(10)                                                                    |
| <i>c</i> [Å]                                   | 15.7610(8)                                                                     |
| $\alpha$ [°]                                   | 75.719(2)                                                                      |
| $\beta$ [°]                                    | 83.088(2)                                                                      |
| $\gamma$ [°]                                   | 77.816(2)                                                                      |
| Volume [Å <sup>3</sup> ]                       | 3076.6(3)                                                                      |
| <i>Z</i>                                       | 2                                                                              |
| $\rho_{\text{calc}}$ [gcm <sup>-3</sup> ]      | 1.475                                                                          |
| $\mu$ [mm <sup>-1</sup> ]                      | 1.461                                                                          |
| <i>F</i> (000)                                 | 1392                                                                           |
| Radiation                                      | MoK $\alpha$ ( $\lambda$ =0.71073 Å)                                           |
| 2 $\theta$ range [°]                           | 3.92 to 54.92 (0.77 Å)                                                         |
| Index ranges                                   | -17 ≤ <i>h</i> ≤ 17, -19 ≤ <i>k</i> ≤ 19, -20 ≤ <i>l</i> ≤ 18                  |
| Reflections collected                          | 107180                                                                         |
| Independent reflections                        | 14073, $R_{\text{int}} = 0.0860$ , $R_{\text{sigma}} = 0.0492$                 |
| Completeness to $\theta = 25.242^\circ$        | 99.8 %                                                                         |
| Data / Restraints / Parameters                 | 14073/2/730                                                                    |
| Goodness-of-fit on $F^2$                       | 1.053                                                                          |
| Final <i>R</i> indexes [ $I \geq 2\sigma(I)$ ] | $R_1 = 0.0636$ , $wR_2 = 0.1926$                                               |
| Final <i>R</i> indexes [all data]              | $R_1 = 0.0755$ , $wR_2 = 0.2034$                                               |
| Largest peak/hole [eÅ <sup>-3</sup> ]          | 2.23/-2.18                                                                     |

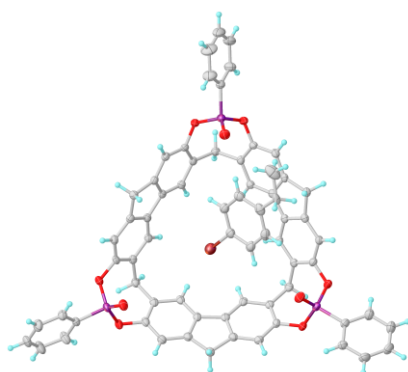

**Figure S34.** X-ray crystal structure of F[3]A1-[P(O)Ph]<sub>3</sub> with (G34) 4-bromoethylbenzene

Thermal ellipsoids were shown at 50% probability level.

|                                                |                                                                                             |
|------------------------------------------------|---------------------------------------------------------------------------------------------|
| CCDC number                                    | 2356654                                                                                     |
| Empirical formula                              | C <sub>76</sub> H <sub>57</sub> Br <sub>2</sub> O <sub>9</sub> P <sub>3</sub>               |
| Formula weight                                 | 1366.88                                                                                     |
| Temperature [K]                                | 193.00                                                                                      |
| Crystal system                                 | triclinic                                                                                   |
| Space group (number)                           | $P\bar{1}$ (2)                                                                              |
| <i>a</i> [Å]                                   | 13.6026(9)                                                                                  |
| <i>b</i> [Å]                                   | 15.1921(9)                                                                                  |
| <i>c</i> [Å]                                   | 15.7610(8)                                                                                  |
| $\alpha$ [°]                                   | 75.719(2)                                                                                   |
| $\beta$ [°]                                    | 83.091(2)                                                                                   |
| $\gamma$ [°]                                   | 77.819(2)                                                                                   |
| Volume [Å <sup>3</sup> ]                       | 3077.3(3)                                                                                   |
| <i>Z</i>                                       | 2                                                                                           |
| $\rho_{\text{calc}}$ [gcm <sup>-3</sup> ]      | 1.2475                                                                                      |
| $\mu$ [mm <sup>-1</sup> ]                      | 1.458                                                                                       |
| <i>F</i> (000)                                 | 1400                                                                                        |
| Radiation                                      | MoK $\alpha$ ( $\lambda$ =0.71073 Å)                                                        |
| 2 $\theta$ range [°]                           | 3.92 to 54.94 (0.77 Å)                                                                      |
| Index ranges                                   | -17 $\leq$ <i>h</i> $\leq$ 17, -19 $\leq$ <i>k</i> $\leq$ 19, -20 $\leq$ <i>l</i> $\leq$ 18 |
| Reflections collected                          | 148601                                                                                      |
| Independent reflections                        | 14061, $R_{\text{int}} = 0.0747$ , $R_{\text{sigma}} = 0.0468$                              |
| Completeness to $\theta = 25.242^\circ$        | 99.7 %                                                                                      |
| Data / Restraints / Parameters                 | 14061/29/730                                                                                |
| Goodness-of-fit on $F^2$                       | 1.020                                                                                       |
| Final <i>R</i> indexes [ $I \geq 2\sigma(I)$ ] | $R_1 = 0.0632$ , $wR_2 = 0.1837$                                                            |
| Final <i>R</i> indexes [all data]              | $R_1 = 0.0719$ , $wR_2 = 0.1913$                                                            |
| Largest peak/hole [eÅ <sup>-3</sup> ]          | 1.65/-2.22                                                                                  |

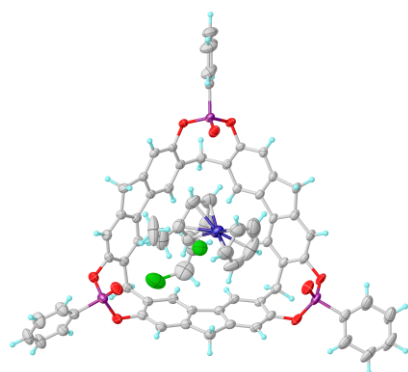

**Figure S35.** X-ray crystal structure of **F[3]A1-[P(O)Ph]<sub>3</sub>** with **(G35) ethylferrocene**

Thermal ellipsoids were shown at 50% probability level.

|                                                |                                                                                 |
|------------------------------------------------|---------------------------------------------------------------------------------|
| CCDC number                                    | 2330061                                                                         |
| Empirical formula                              | C <sub>74</sub> H <sub>57</sub> Cl <sub>2</sub> FeO <sub>9</sub> P <sub>3</sub> |
| Formula weight                                 | 1309.85                                                                         |
| Temperature [K]                                | 193.0                                                                           |
| Crystal system                                 | triclinic                                                                       |
| Space group (number)                           | $P\bar{1}$ (2)                                                                  |
| <i>a</i> [Å]                                   | 11.3186(6)                                                                      |
| <i>b</i> [Å]                                   | 17.3978(9)                                                                      |
| <i>c</i> [Å]                                   | 19.4271(10)                                                                     |
| $\alpha$ [°]                                   | 84.705(2)                                                                       |
| $\beta$ [°]                                    | 86.771(2)                                                                       |
| $\gamma$ [°]                                   | 81.802(2)                                                                       |
| Volume [Å <sup>3</sup> ]                       | 3766.7(3)                                                                       |
| <i>Z</i>                                       | 2                                                                               |
| $\rho_{\text{calc}}$ [gcm <sup>-3</sup> ]      | 1.155                                                                           |
| $\mu$ [mm <sup>-1</sup> ]                      | 2.160                                                                           |
| <i>F</i> (000)                                 | 1356                                                                            |
| Radiation                                      | GaK $\alpha$ ( $\lambda$ =1.34139 Å)                                            |
| 2 $\theta$ range [°]                           | 3.98 to 108.09 (0.83 Å)                                                         |
| Index ranges                                   | -13 ≤ <i>h</i> ≤ 13, -20 ≤ <i>k</i> ≤ 20, -23 ≤ <i>l</i> ≤ 23                   |
| Reflections collected                          | 35833                                                                           |
| Independent reflections                        | 13631, $R_{\text{int}} = 0.0384$ , $R_{\text{sigma}} = 0.0434$                  |
| Completeness to $\theta = 53.594^\circ$        | 98.7 %                                                                          |
| Data / Restraints / Parameters                 | 13631/25/802                                                                    |
| Goodness-of-fit on $F^2$                       | 1.109                                                                           |
| Final <i>R</i> indexes [ $I \geq 2\sigma(I)$ ] | $R_1 = 0.0678$ , $wR_2 = 0.2102$                                                |
| Final <i>R</i> indexes [all data]              | $R_1 = 0.0742$ , $wR_2 = 0.2180$                                                |
| Largest peak/hole [eÅ <sup>-3</sup> ]          | 1.97/-1.27                                                                      |

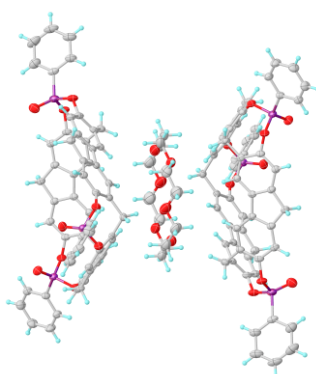

**Figure S36.** X-ray crystal structure of F[3]A1-[P(O)Ph]<sub>3</sub> with (G36) 18-crown-6  
Thermal ellipsoids were shown at 50% probability level.

|                                                |                                                                                  |
|------------------------------------------------|----------------------------------------------------------------------------------|
| CCDC number                                    | 2330062                                                                          |
| Empirical formula                              | C <sub>75</sub> H <sub>63</sub> Cl <sub>1.5</sub> O <sub>14</sub> P <sub>3</sub> |
| Formula weight                                 | 1334.30                                                                          |
| Temperature [K]                                | 193.00                                                                           |
| Crystal system                                 | triclinic                                                                        |
| Space group (number)                           | $P\bar{1}$ (2)                                                                   |
| <i>a</i> [Å]                                   | 13.726(19)                                                                       |
| <i>b</i> [Å]                                   | 14.832(12)                                                                       |
| <i>c</i> [Å]                                   | 15.35(2)                                                                         |
| $\alpha$ [°]                                   | 91.27(6)                                                                         |
| $\beta$ [°]                                    | 94.06(15)                                                                        |
| $\gamma$ [°]                                   | 91.93(5)                                                                         |
| Volume [Å <sup>3</sup> ]                       | 3115(7)                                                                          |
| <i>Z</i>                                       | 2                                                                                |
| $\rho_{\text{calc}}$ [gcm <sup>-3</sup> ]      | 1.423                                                                            |
| $\mu$ [mm <sup>-1</sup> ]                      | 2.057                                                                            |
| <i>F</i> (000)                                 | 1391                                                                             |
| Radiation                                      | CuK $\alpha$ ( $\lambda$ =1.54178 Å)                                             |
| 2 $\theta$ range [°]                           | 5.77 to 136.48 (0.83 Å)                                                          |
| Index ranges                                   | -16 ≤ <i>h</i> ≤ 16, -17 ≤ <i>k</i> ≤ 17, -18 ≤ <i>l</i> ≤ 18                    |
| Reflections collected                          | 45076                                                                            |
| Independent reflections                        | 11296, $R_{\text{int}} = 0.0418$ , $R_{\text{sigma}} = 0.0389$                   |
| Completeness to $\theta = 67.679^\circ$        | 99.3 %                                                                           |
| Data / Restraints / Parameters                 | 11296/29/749                                                                     |
| Goodness-of-fit on $F^2$                       | 1.032                                                                            |
| Final <i>R</i> indexes [ $I \geq 2\sigma(I)$ ] | $R_1 = 0.0473$ , $wR_2 = 0.1303$                                                 |
| Final <i>R</i> indexes [all data]              | $R_1 = 0.0507$ , $wR_2 = 0.1322$                                                 |
| Largest peak/hole [eÅ <sup>-3</sup> ]          | 0.47/-0.53                                                                       |

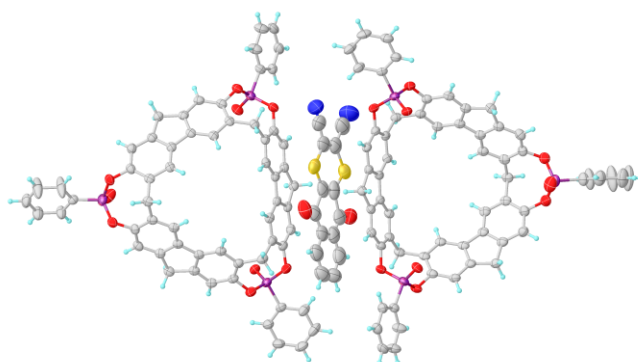

**Figure S37.** X-ray crystal structure of **F[3]A1-[P(O)Ph]<sub>3</sub>** with **(G37) dithianon**  
 Thermal ellipsoids were shown at 50% probability level.

|                                                |                                                                                             |
|------------------------------------------------|---------------------------------------------------------------------------------------------|
| CCDC number                                    | 2356656                                                                                     |
| Empirical formula                              | C <sub>75</sub> H <sub>62.5</sub> Cl <sub>1.5</sub> O <sub>14</sub> P <sub>3</sub>          |
| Formula weight                                 | 1333.56                                                                                     |
| Temperature [K]                                | 193.15                                                                                      |
| Crystal system                                 | triclinic                                                                                   |
| Space group (number)                           | $P\bar{1}$ (2)                                                                              |
| <i>a</i> [Å]                                   | 14.9110(3)                                                                                  |
| <i>b</i> [Å]                                   | 19.8365(4)                                                                                  |
| <i>c</i> [Å]                                   | 25.6177(5)                                                                                  |
| $\alpha$ [°]                                   | 104.3670(10)                                                                                |
| $\beta$ [°]                                    | 104.5610(10)                                                                                |
| $\gamma$ [°]                                   | 99.0420(10)                                                                                 |
| Volume [Å <sup>3</sup> ]                       | 6907.0(2)                                                                                   |
| <i>Z</i>                                       | 2                                                                                           |
| $\rho_{\text{calc}}$ [gcm <sup>-3</sup> ]      | 1.422                                                                                       |
| $\mu$ [mm <sup>-1</sup> ]                      | 2.057                                                                                       |
| <i>F</i> (000)                                 | 1389                                                                                        |
| Radiation                                      | CuK $\alpha$ ( $\lambda$ =1.54178 Å)                                                        |
| 2 $\theta$ range [°]                           | 3.74 to 136.76 (0.83 Å)                                                                     |
| Index ranges                                   | -17 $\leq$ <i>h</i> $\leq$ 17, -23 $\leq$ <i>k</i> $\leq$ 23, -27 $\leq$ <i>l</i> $\leq$ 30 |
| Reflections collected                          | 99441                                                                                       |
| Independent reflections                        | 25217, $R_{\text{int}}$ = 0.0652, $R_{\text{sigma}}$ = 0.0470                               |
| Completeness to $\theta$ = 67.679°             | 99.9 %                                                                                      |
| Data / Restraints / Parameters                 | 25217/58/1587                                                                               |
| Goodness-of-fit on $F^2$                       | 1.022                                                                                       |
| Final <i>R</i> indexes [ $I \geq 2\sigma(I)$ ] | $R_1$ = 0.0471, $wR_2$ = 0.1288                                                             |
| Final <i>R</i> indexes [all data]              | $R_1$ = 0.0505, $wR_2$ = 0.1307                                                             |
| Largest peak/hole [eÅ <sup>-3</sup> ]          | 0.27/-0.54                                                                                  |

## 5. Co-crystal analysis of F[3]A1-[P(O)Ph]<sub>3</sub> and G36-G37

### 5.1 Co-crystal of 18-crown-6 (G36) and F[3]A1-[P(O)Ph]<sub>3</sub>

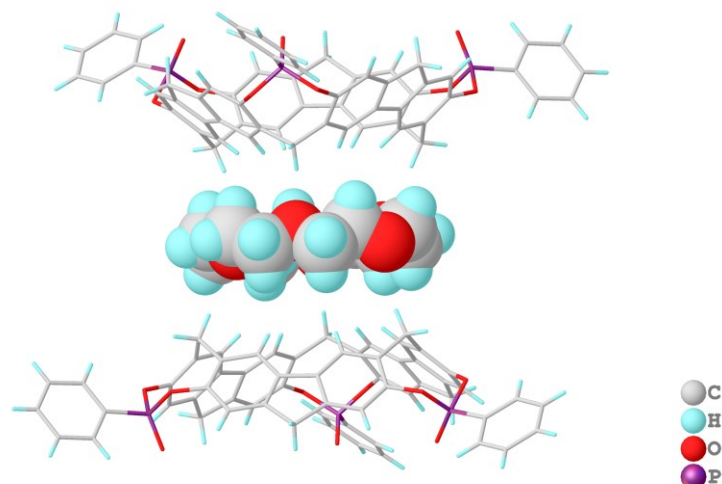

**Figure S38.** Sandwich construction of 18-crown-6 and F[3]A1-[P(O)Ph]<sub>3</sub> cocrystals. Solvent molecules are omitted to clarify.

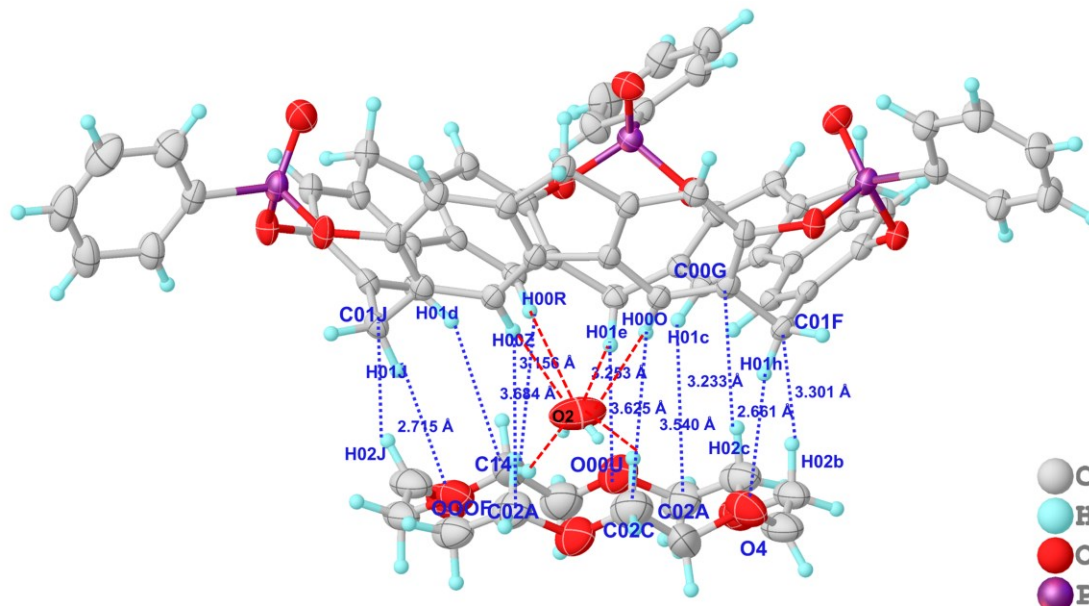

|                    |                    |                    |                  |                  |                   |
|--------------------|--------------------|--------------------|------------------|------------------|-------------------|
| H02b-CO1F: 3.301 Å | H00O-C02C: 3.645 Å | H01J-O00F: 2.715 Å | O2-H00Z: 2.605 Å | O2-H00G: 2.782 Å | H2B-O00Y: 2.228 Å |
| H01h-O4: 2.661 Å   | H01e-O00U: 3.253 Å | H01d-C14: 3.429 Å  | O2-H01D: 2.935 Å | O2-H00R: 3.521 Å | H2B-O00F: 2.959 Å |
| H02c-COOG: 3.233 Å | H00Z-C02A: 3.684 Å | H02J-C01J: 3.578 Å | O2-H00O: 2.613 Å | O2-H01C: 3.434 Å | H2B-O00U: 2.951 Å |
| H01c-C02A: 3.540 Å | H00R-C14: 3.156 Å  |                    |                  |                  |                   |

**Figure S39.** Donor-acceptor interactions between (G36) 18-crown-6 and F[3]A1-[P(O)Ph]<sub>3</sub>. Solvent molecules are omitted to clarify. Thermal ellipsoids were shown at 50% probability level.



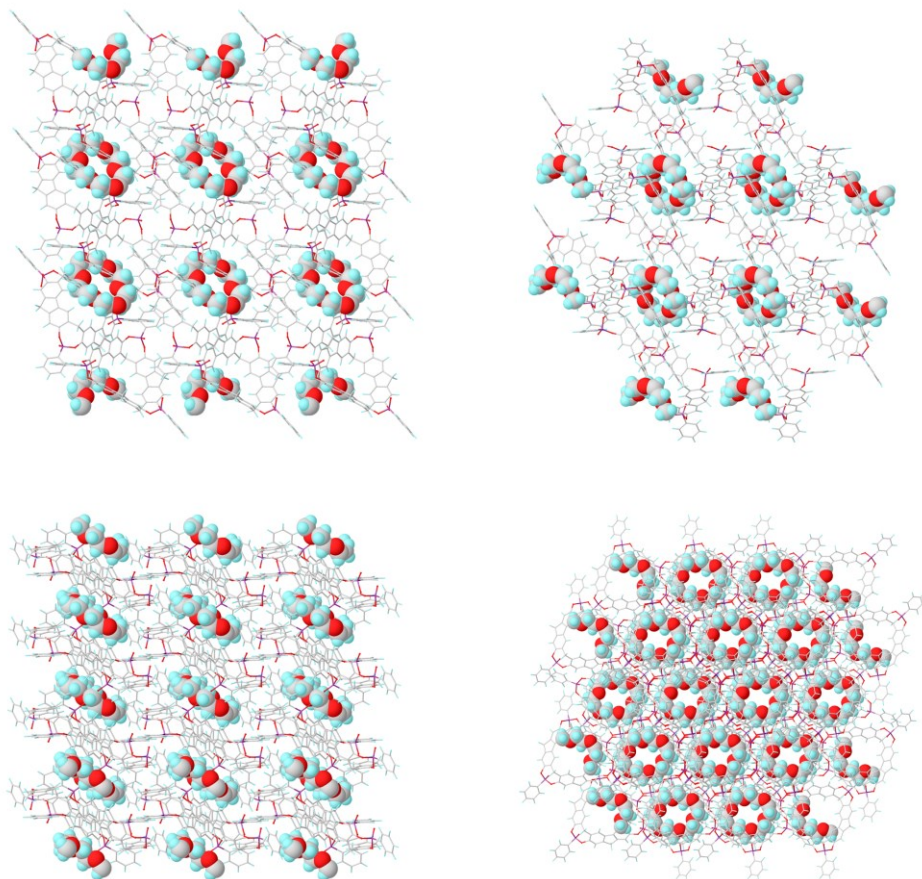

## Packing mode

**Figure S40.** Packing mode of 18-crown-6 and **F[3]A1-[P(O)Ph]<sub>3</sub>** cocrystals.  
Thermal ellipsoids were shown at 50% probability level.

## 5.2 Co-crystal of dithianon (G37) and F[3]A1-[P(O)Ph]<sub>3</sub>

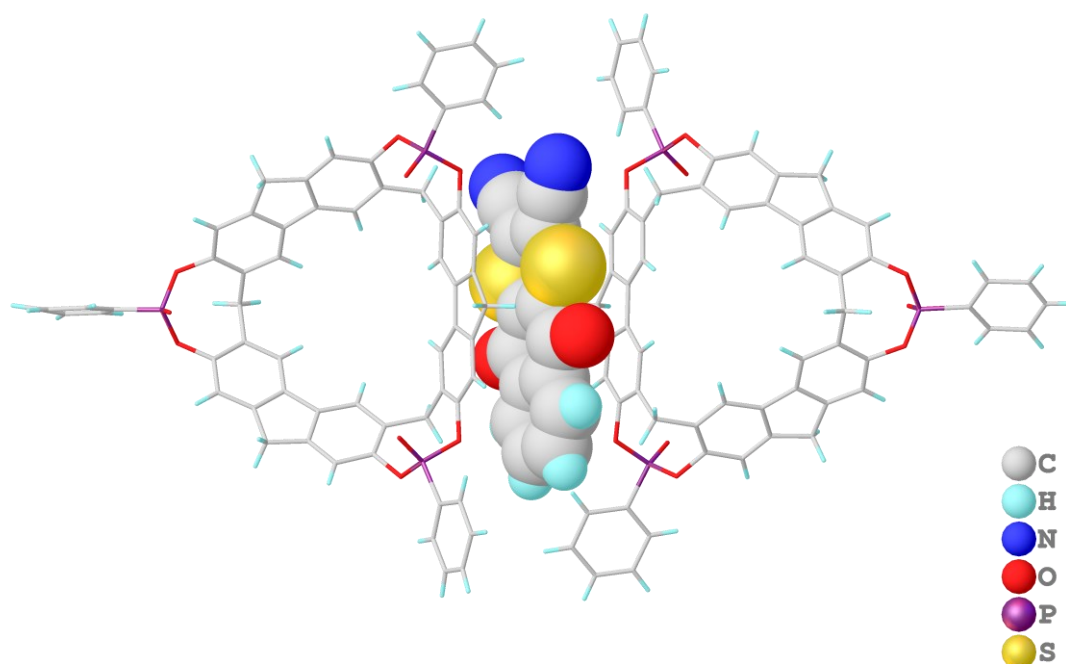

**Figure S41.** The structure of dithianon and F[3]A1-[P(O)Ph]<sub>3</sub> cocrystals. Solvent molecules are omitted to clarify.

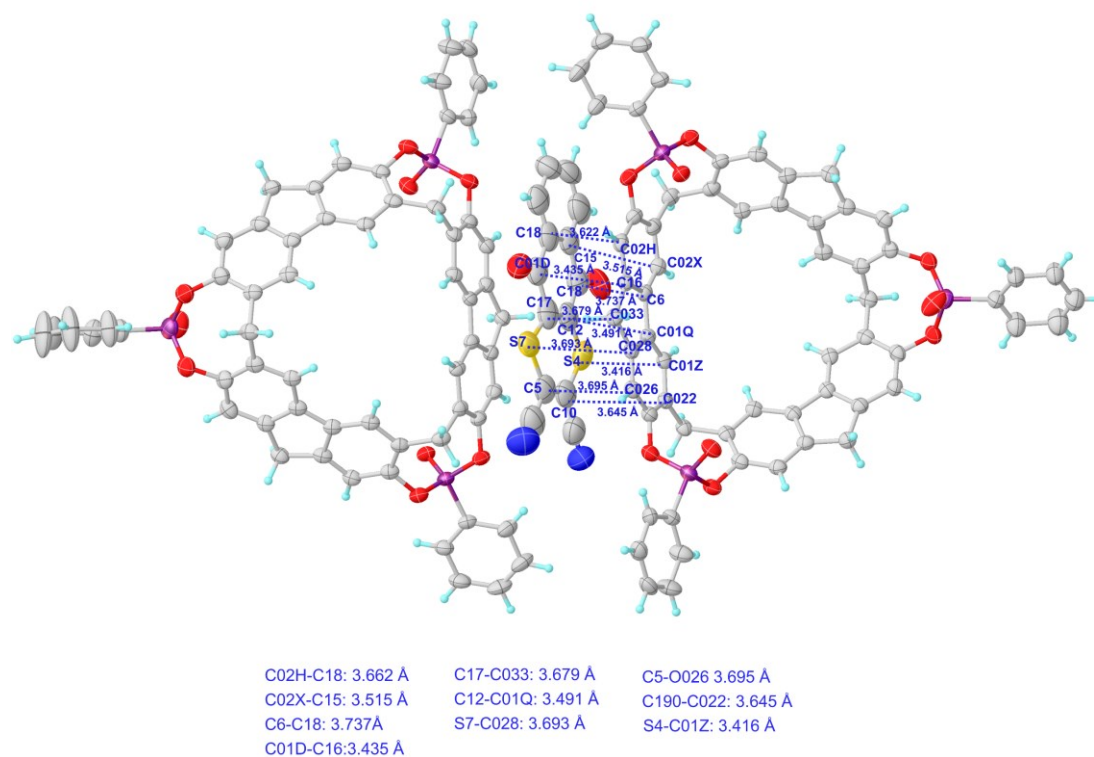

**Figure S42.** Donor-acceptor interactions between (G37) dithianon and F[3]A1-[P(O)Ph]<sub>3</sub>. Solvent molecules are omitted to clarify. Thermal ellipsoids were shown at 50% probability level.

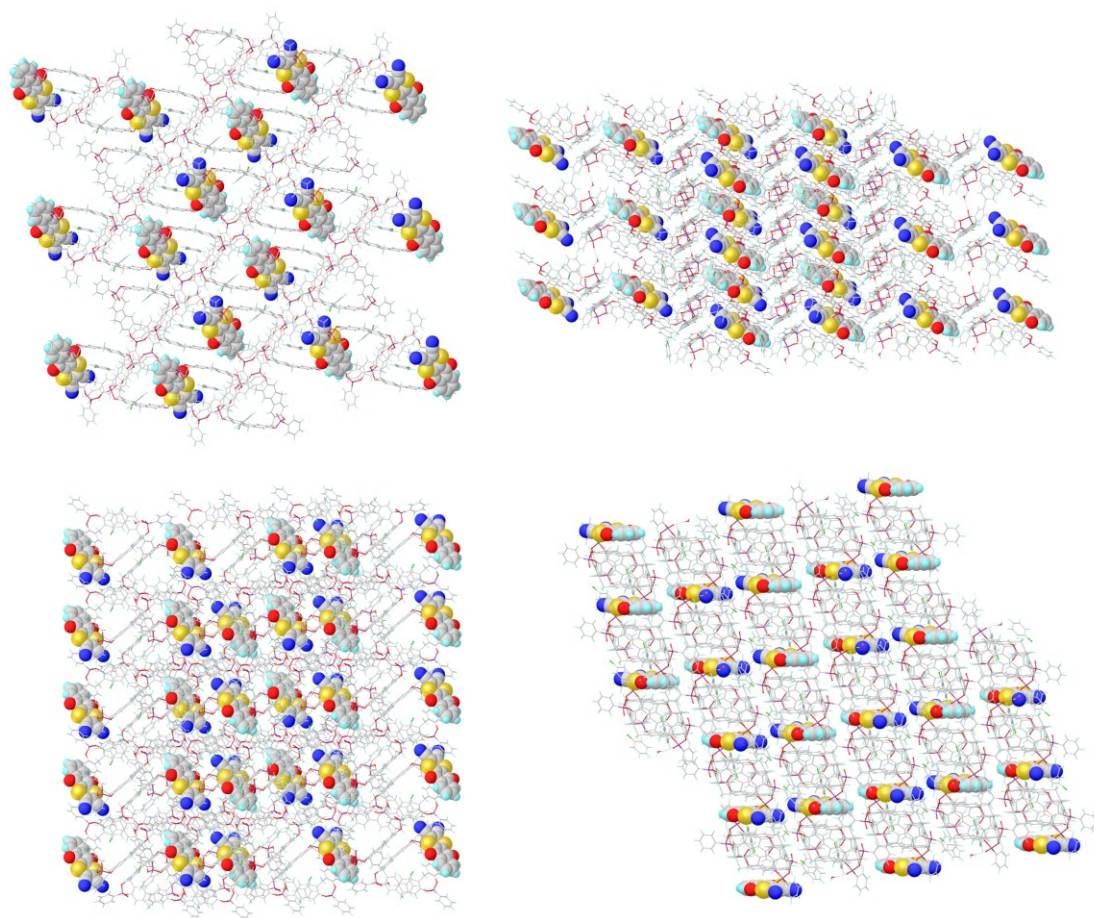

## Packing mode

**Figure S43.** Packing mode of dithianon and  $F[3]A1-[P(O)Ph]_3$  cocrystals. Thermal ellipsoids were shown at 50% probability level.

## 6. The 2D Hirshfeld fingerprint plots

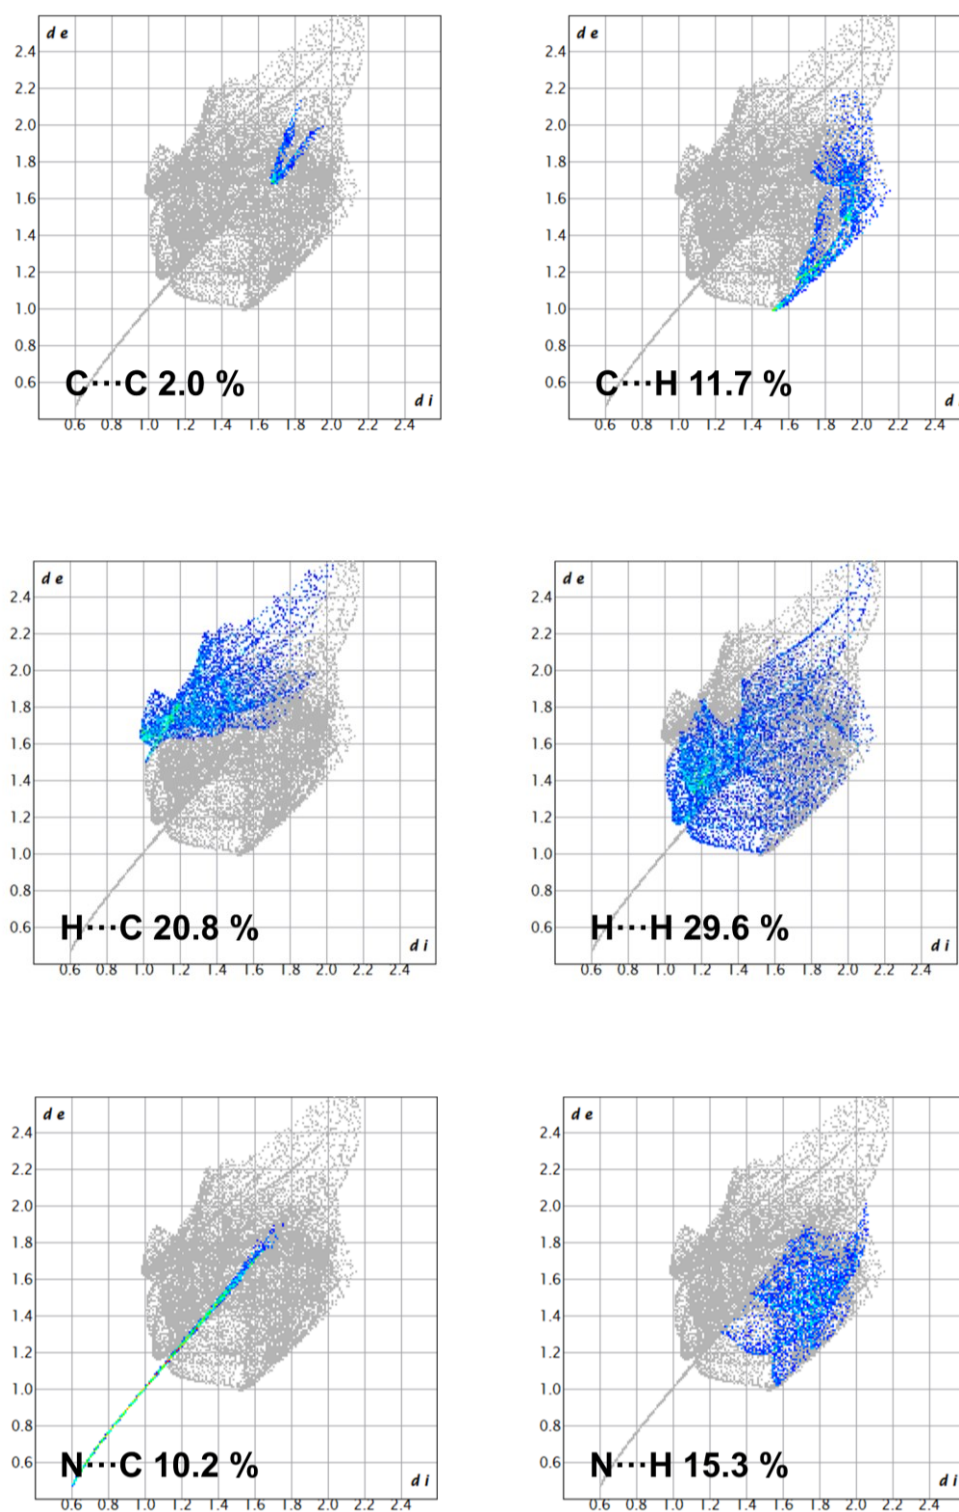

Figure S44. The 2D Hirshfeld fingerprints of (G1)

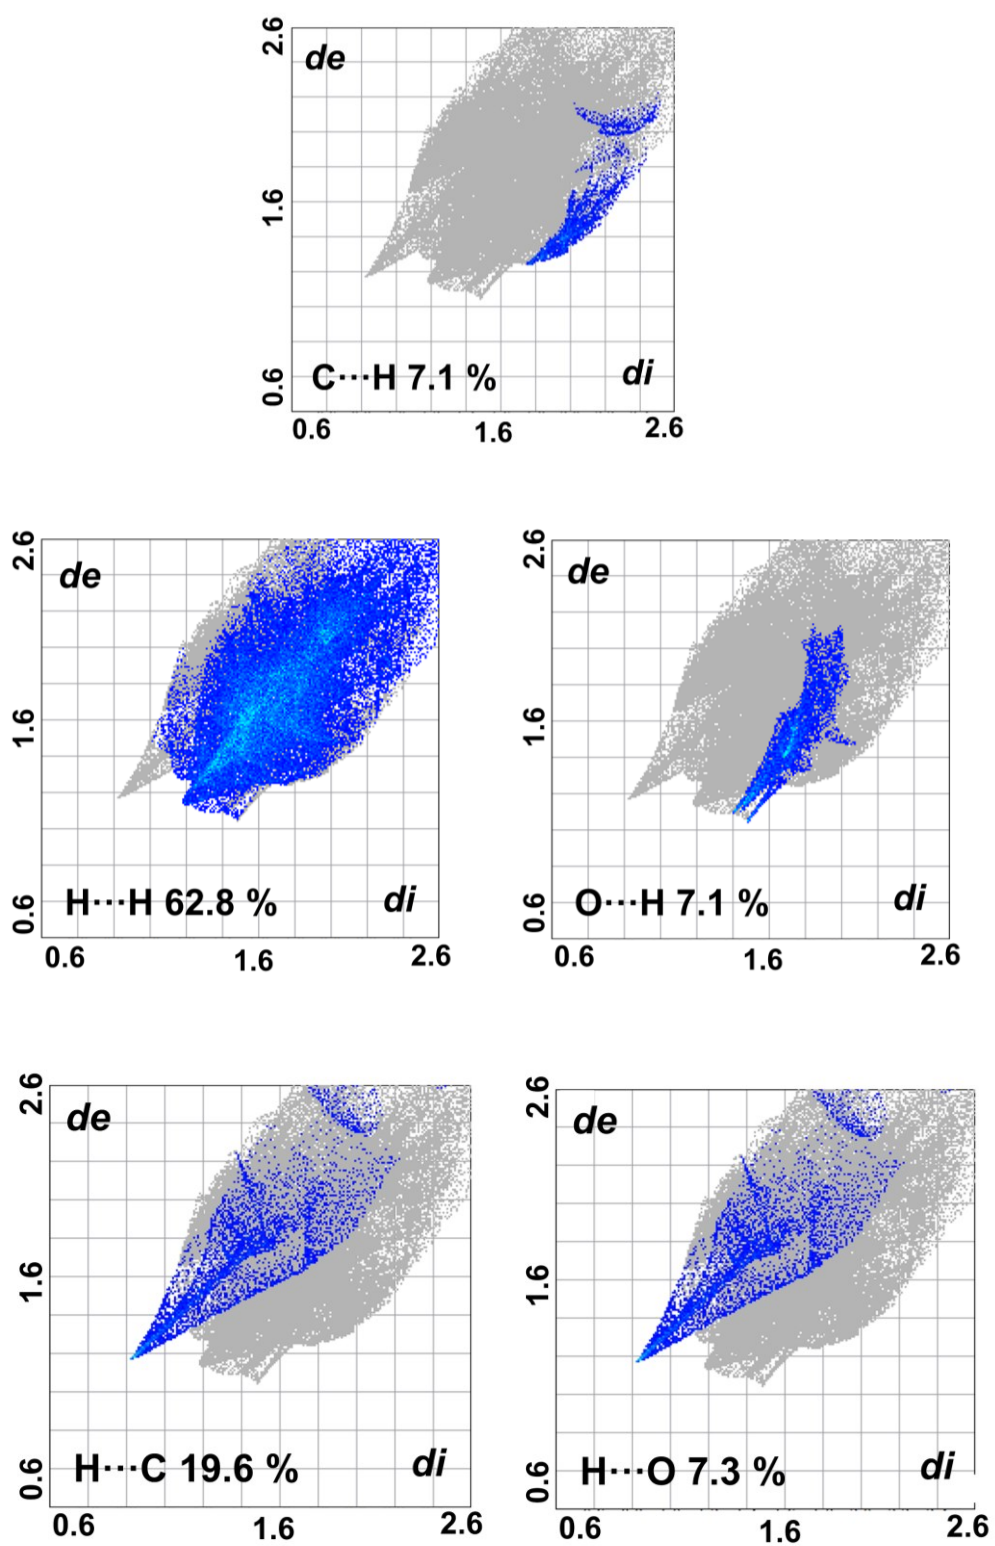

Figure S45. The 2D Hirshfeld fingerprints of (G2)

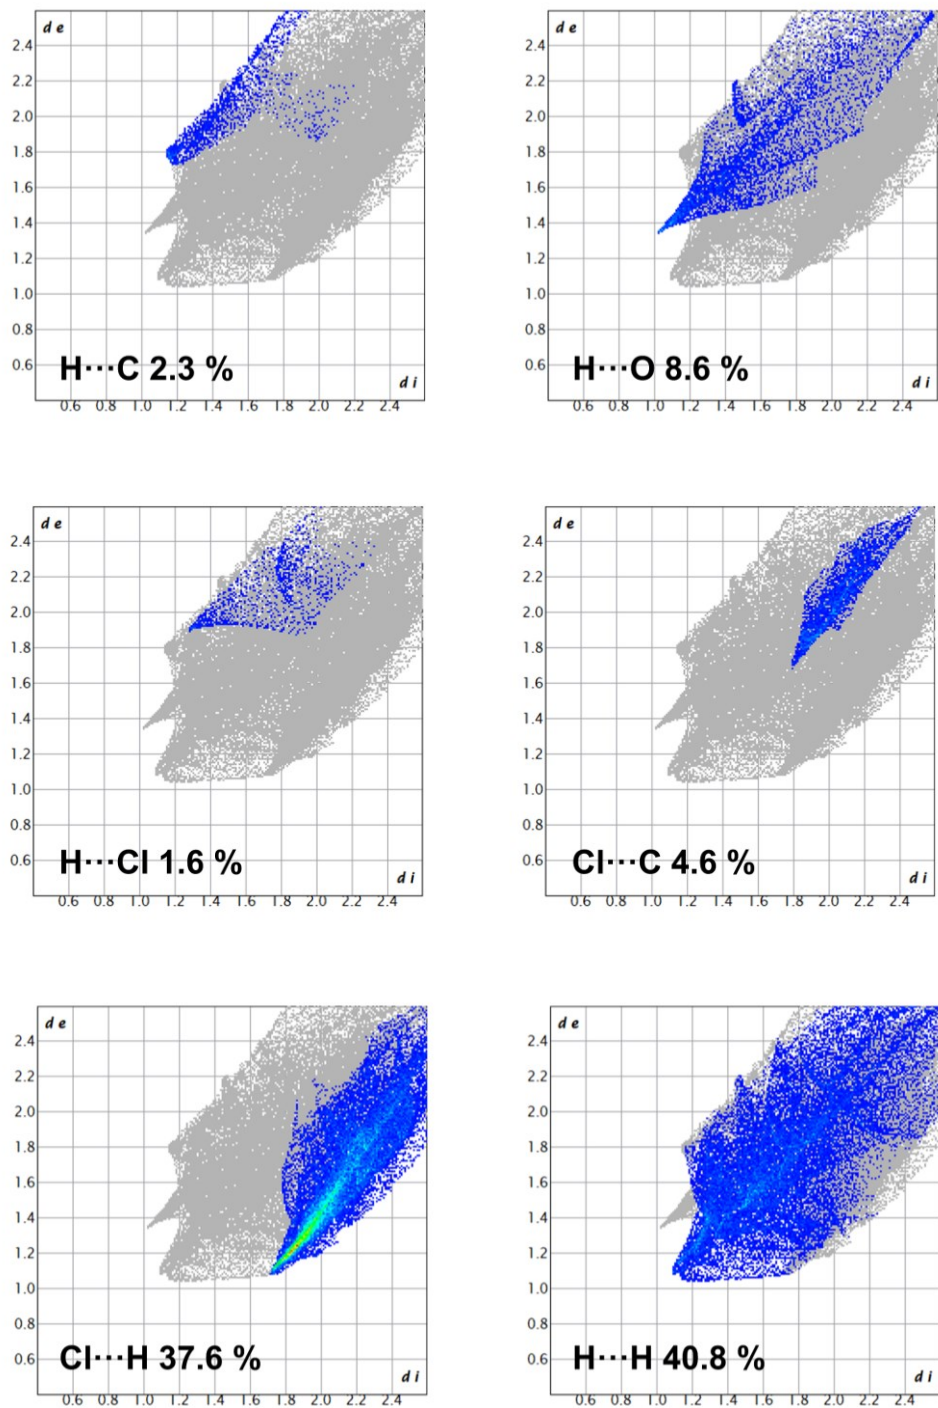

**Figure S46.** The 2D Hirshfeld fingerprints of (G3)

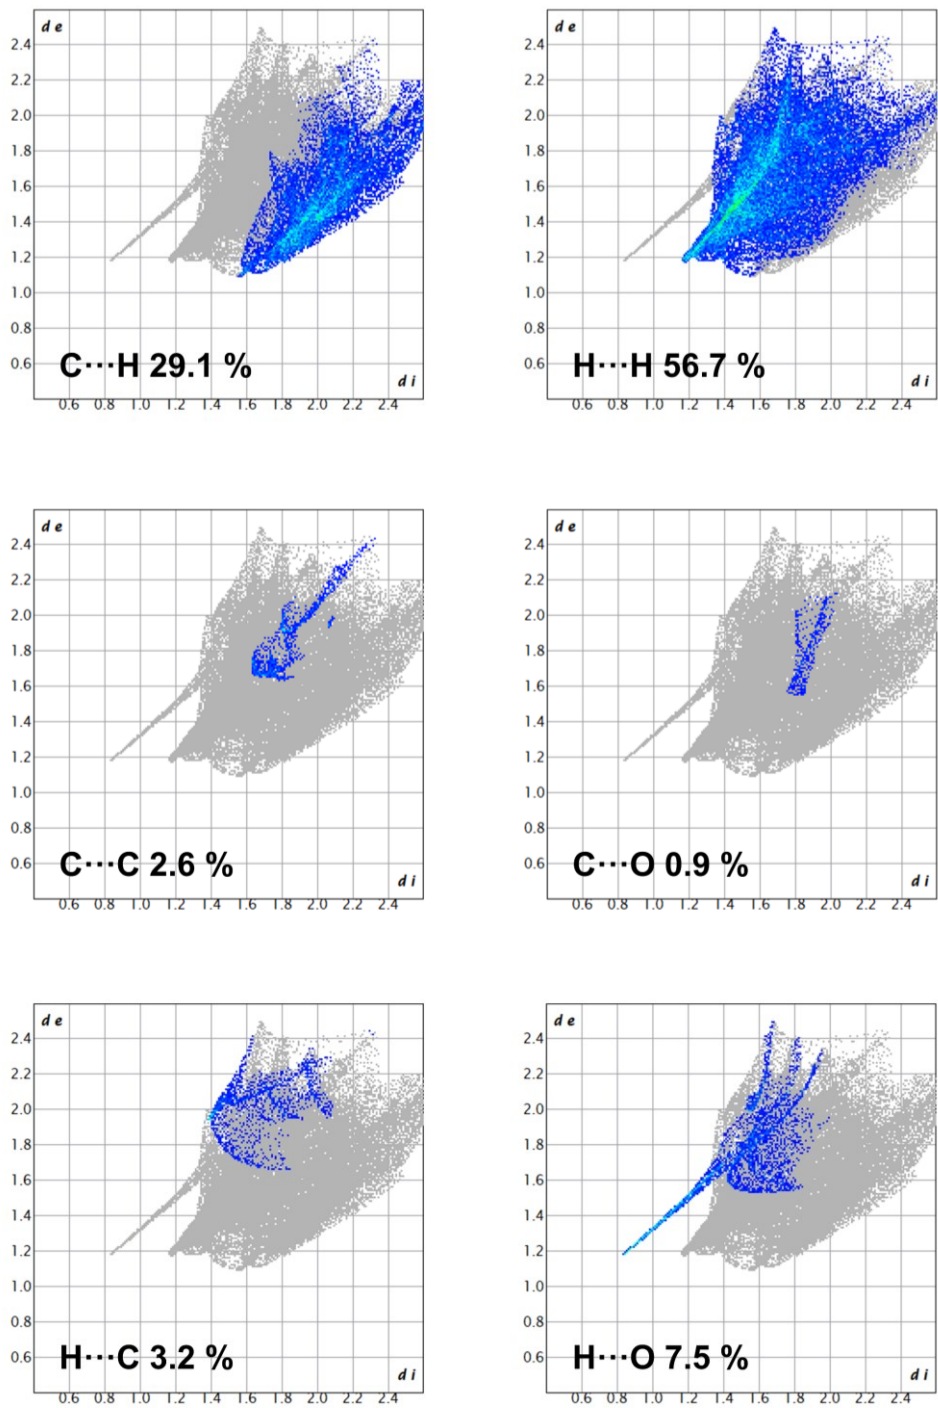

**Figure S47.** The 2D Hirshfeld fingerprints of (G4)

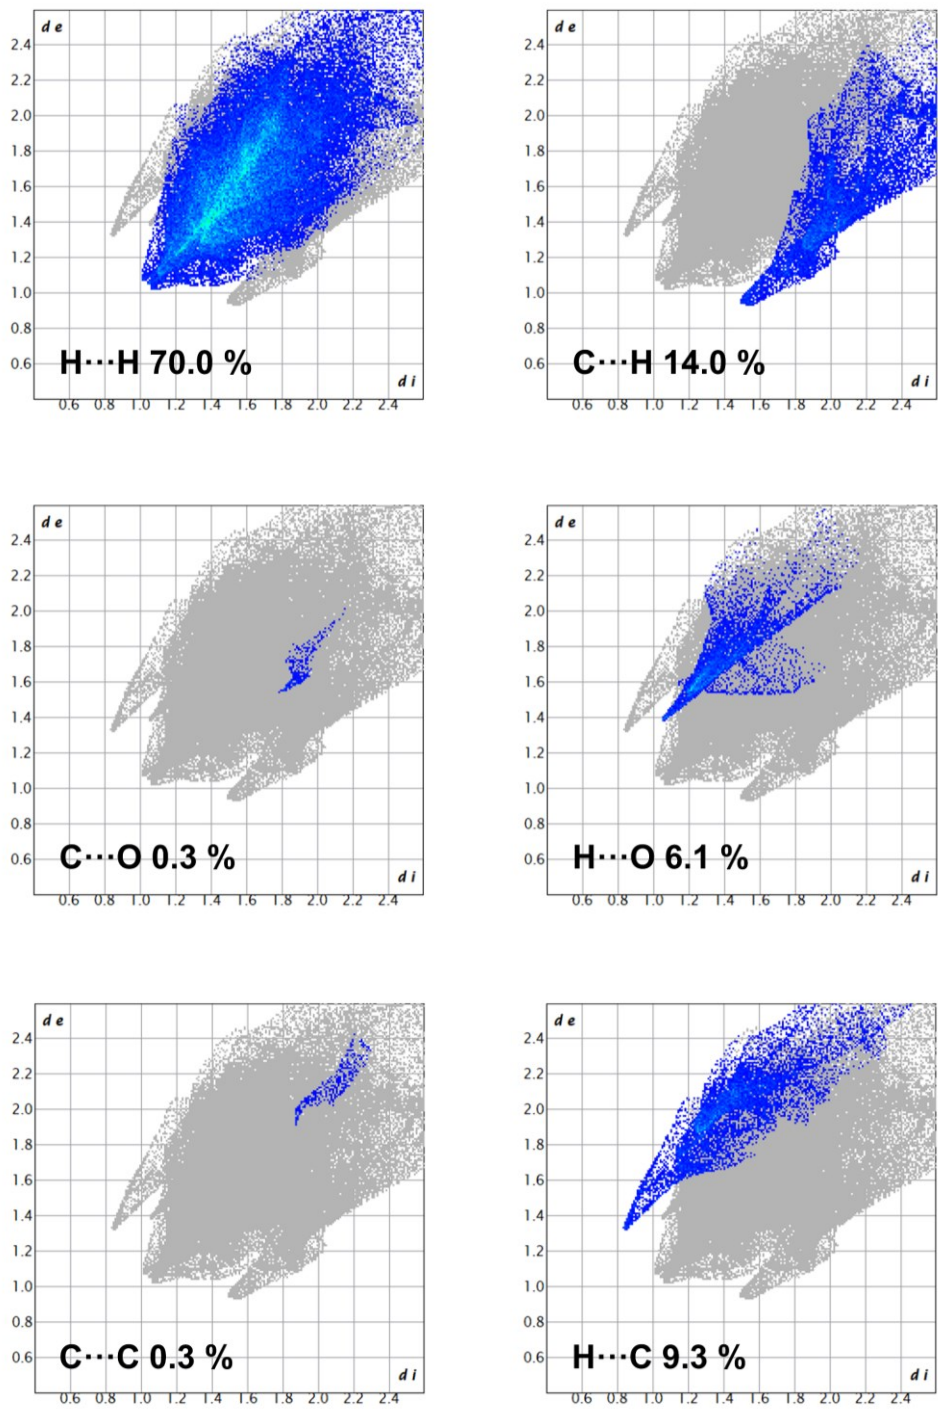

**Figure S48.** The 2D Hirshfeld fingerprints of (G5)



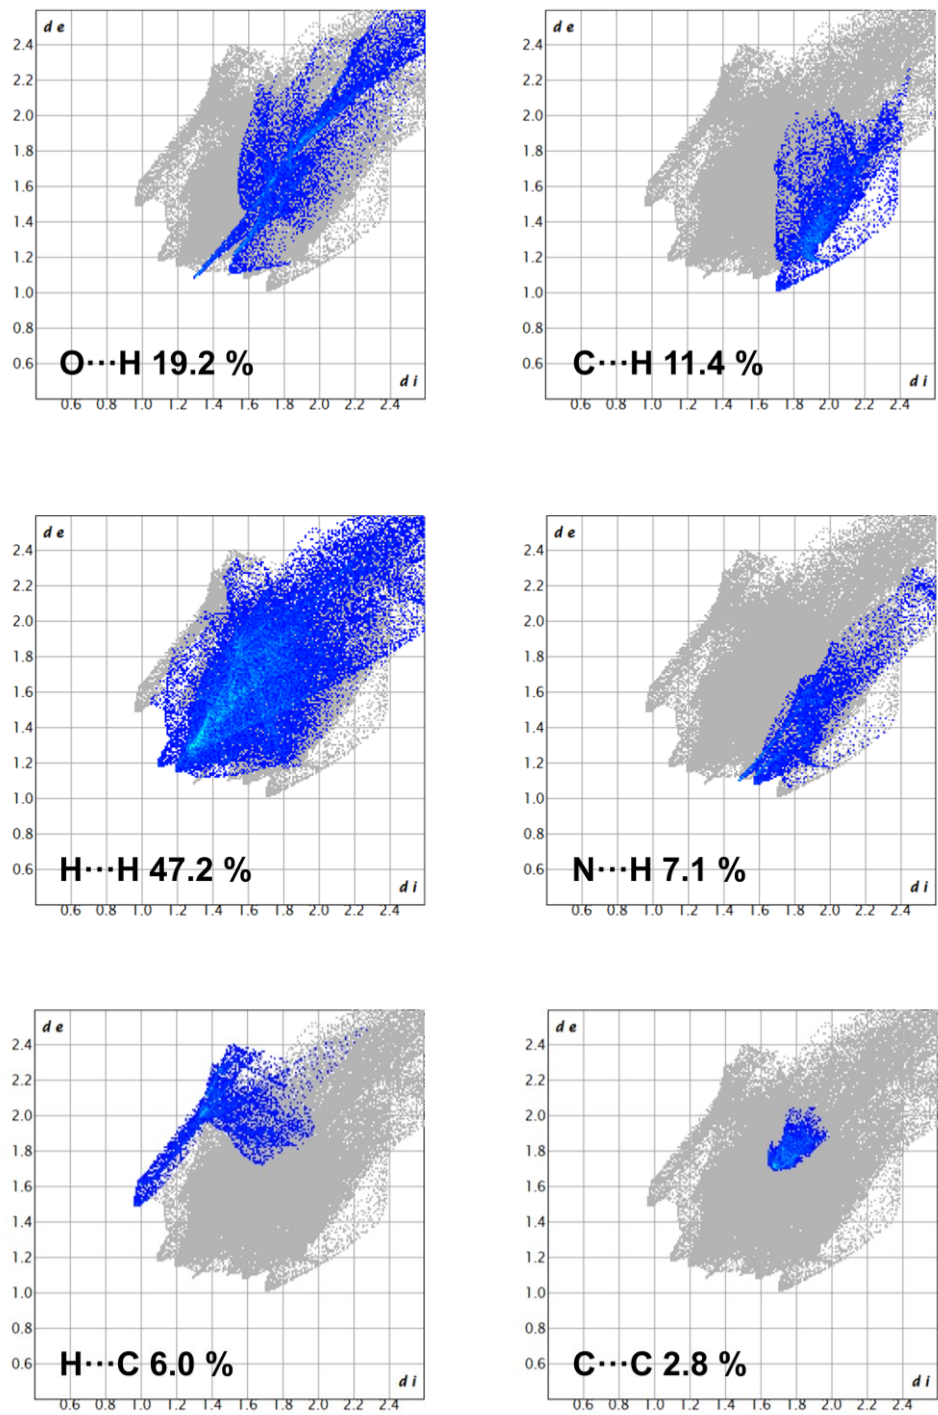

**Figure S49.** The 2D Hirshfeld fingerprints of (G6)

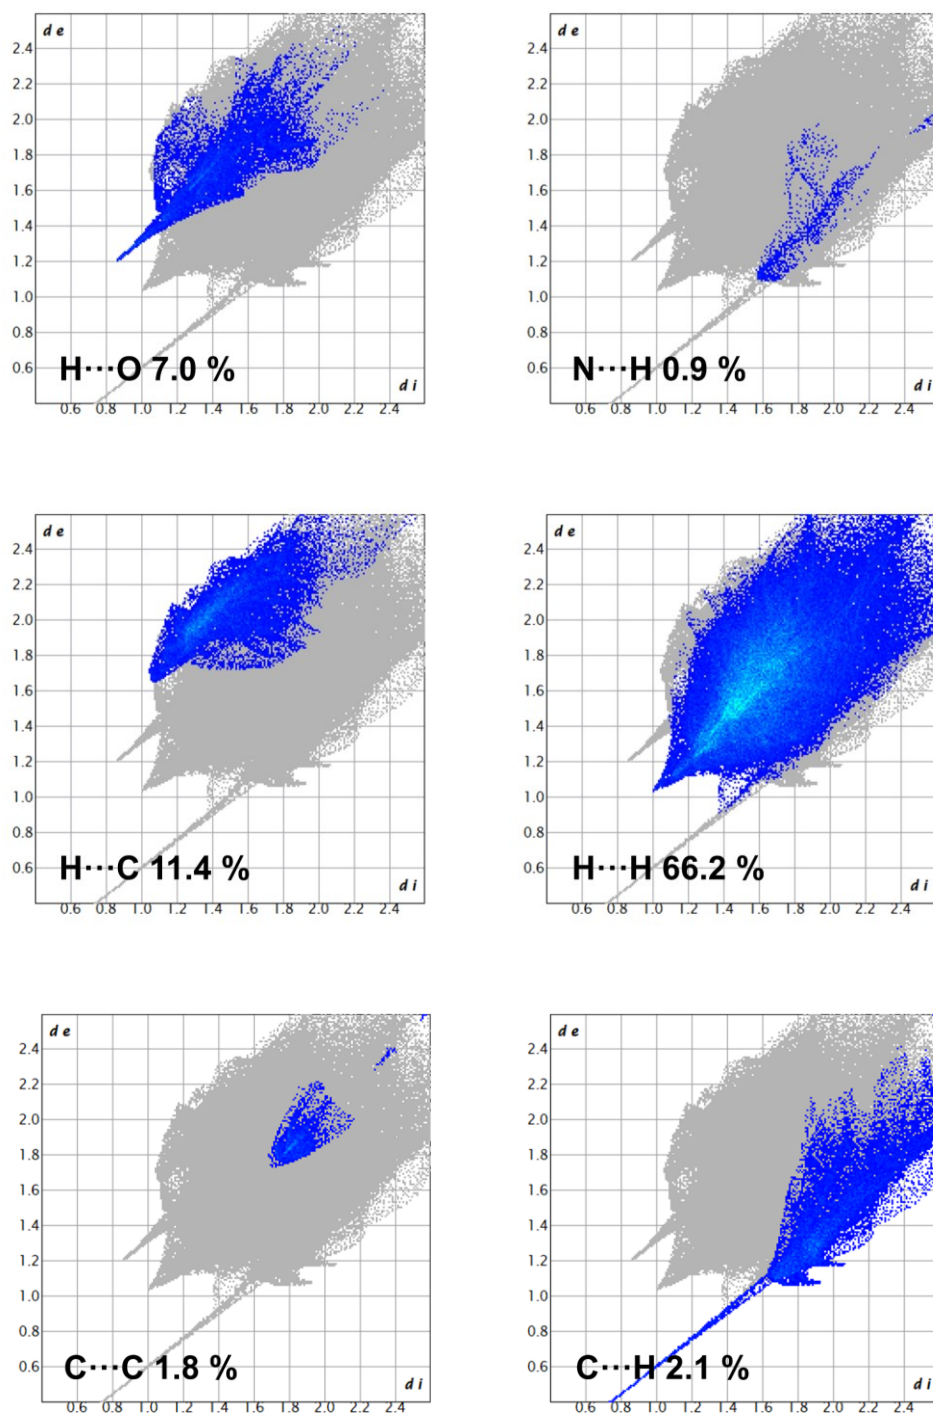

**Figure S50.** The 2D Hirshfeld fingerprints of (G7)

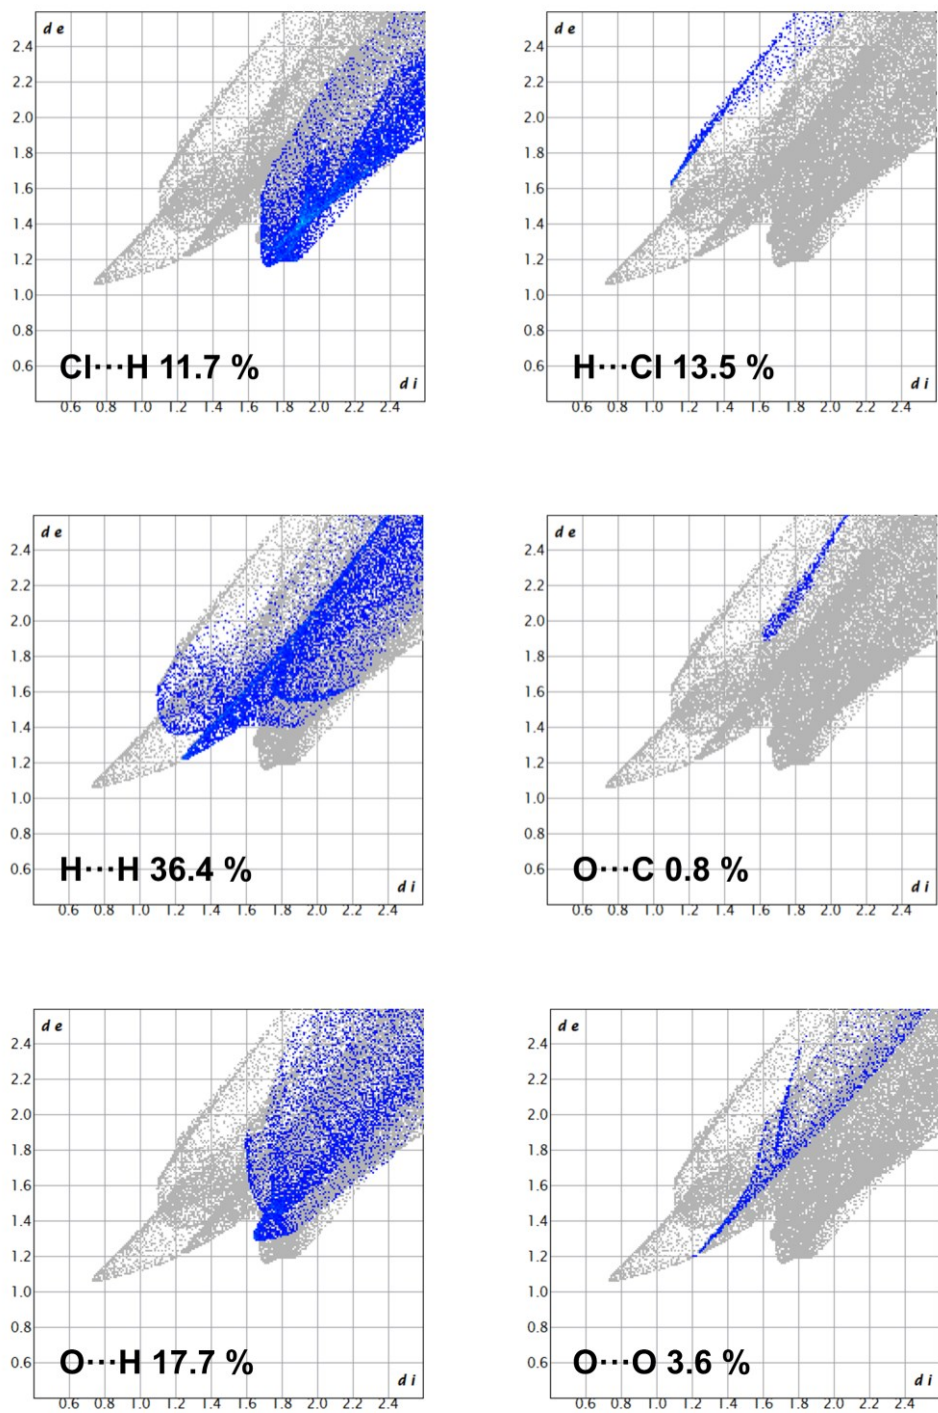

**Figure S51.** The 2D Hirshfeld fingerprints of (G8)

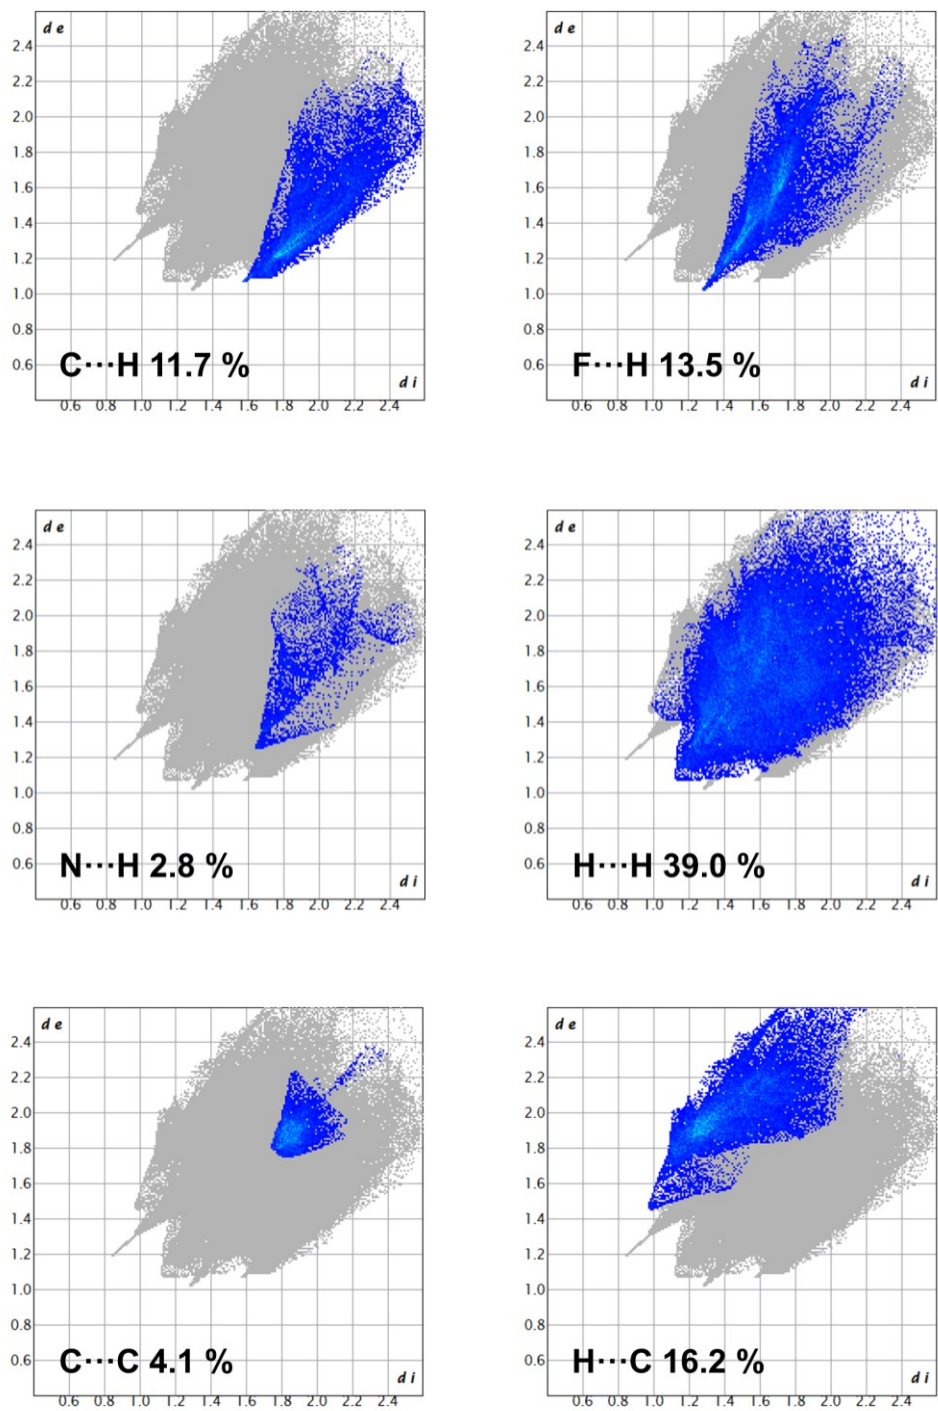

**Figure S52.** The 2D Hirshfeld fingerprints of (G9)

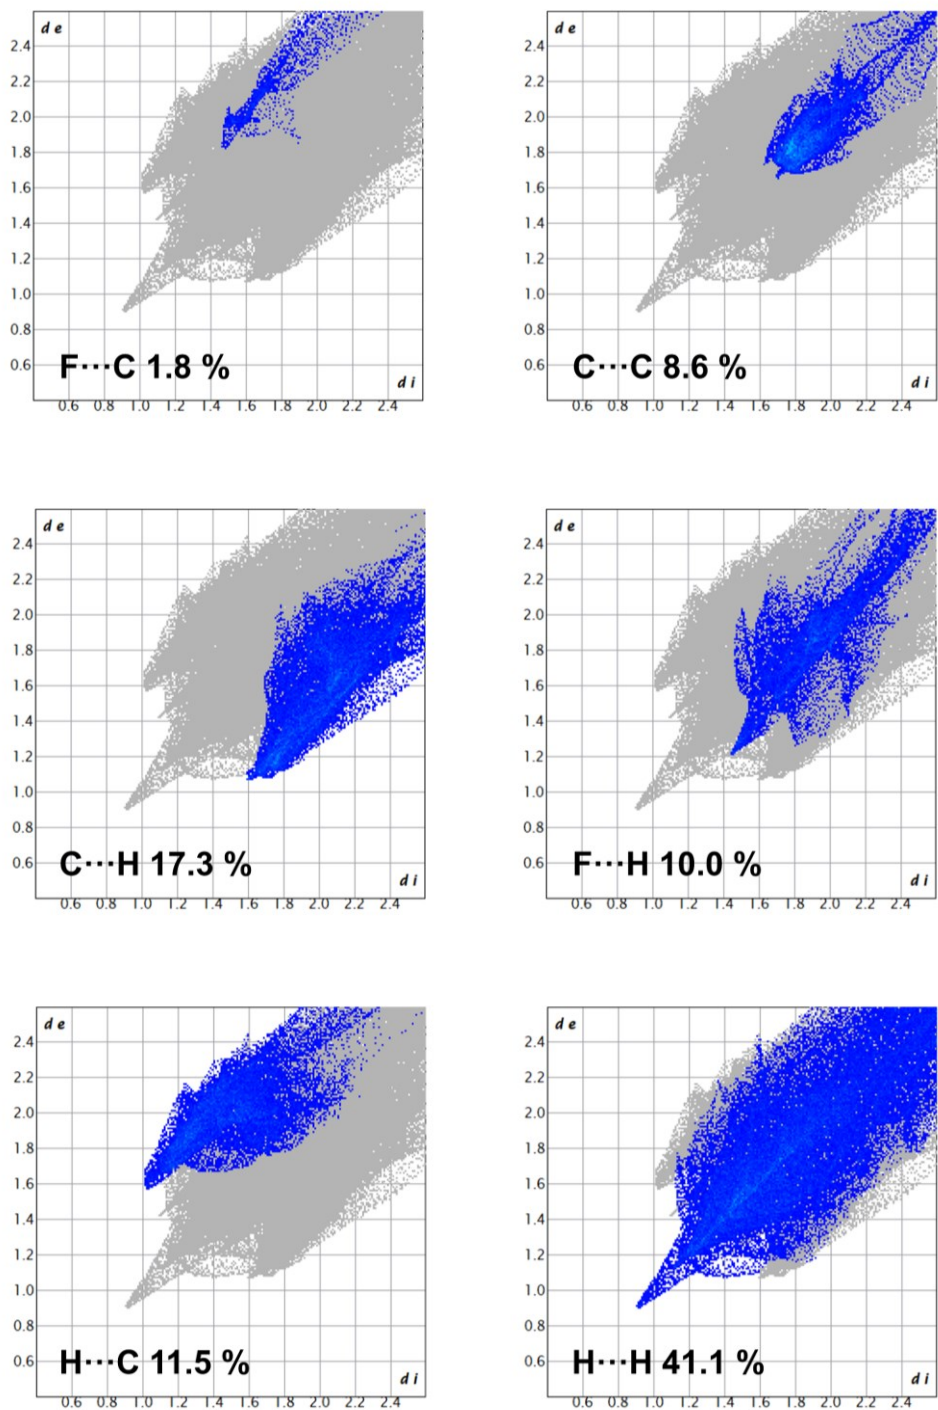

**Figure S53.** The 2D Hirshfeld fingerprints of (G10)

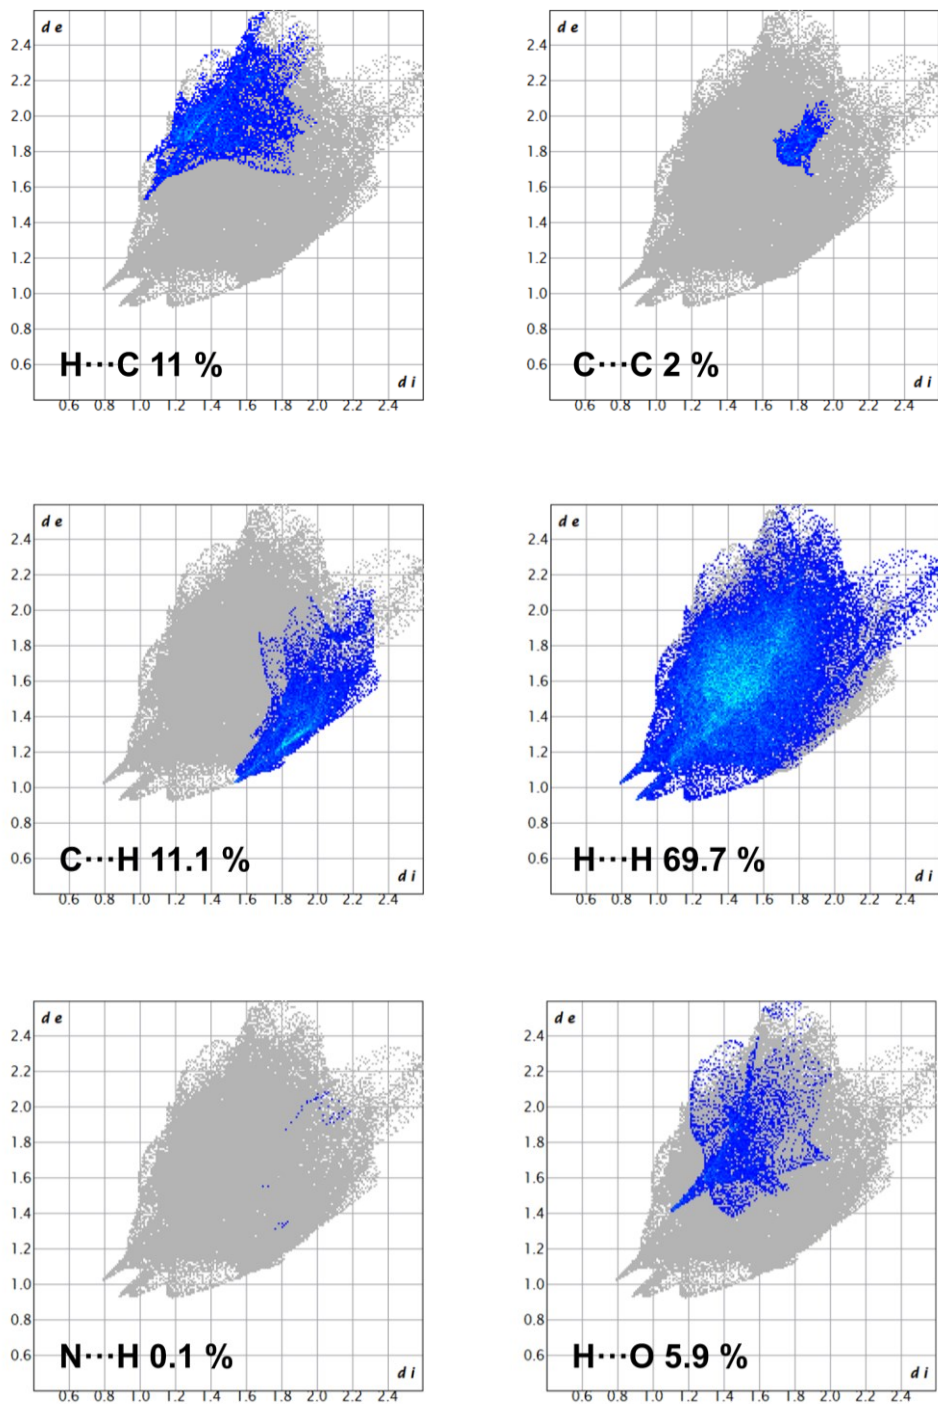

**Figure S54.** The 2D Hirshfeld fingerprints of (G11)

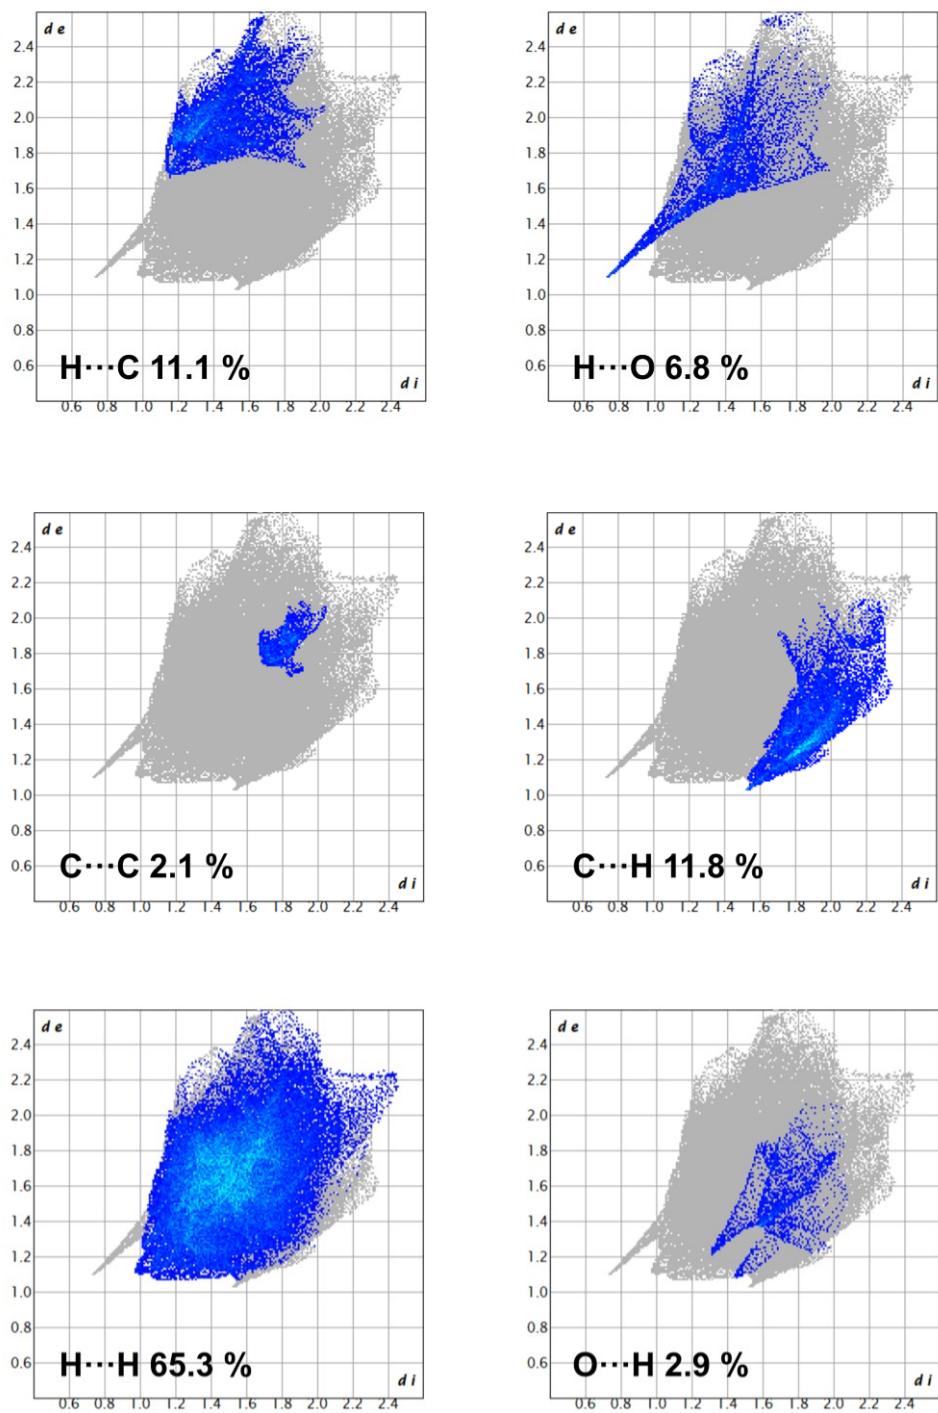

**Figure S55.** The 2D Hirshfeld fingerprints of (G12)

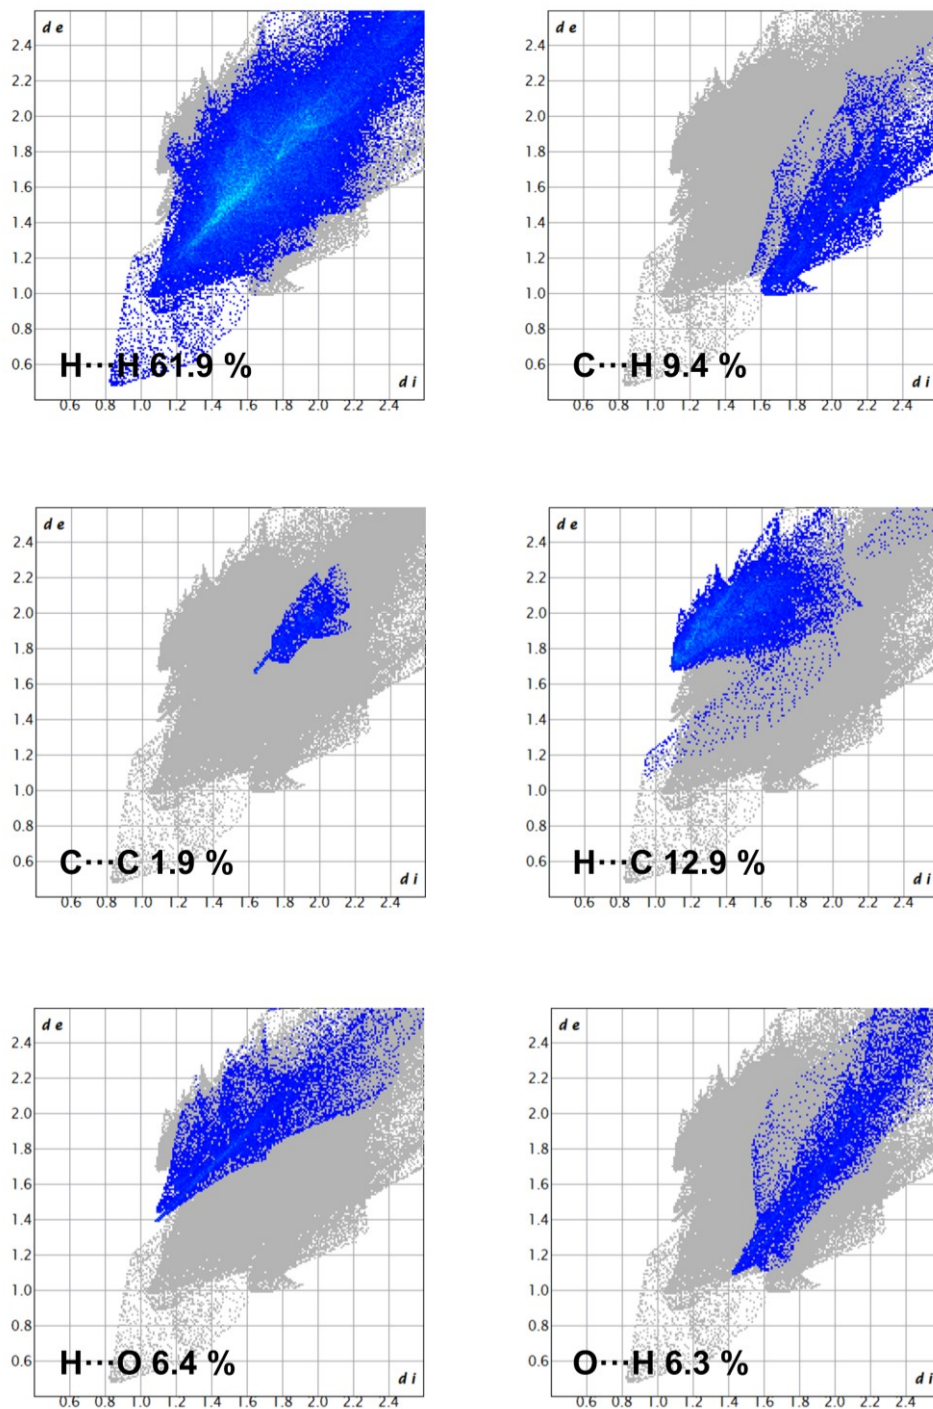

**Figure S56.** The 2D Hirshfeld fingerprints of (G13)



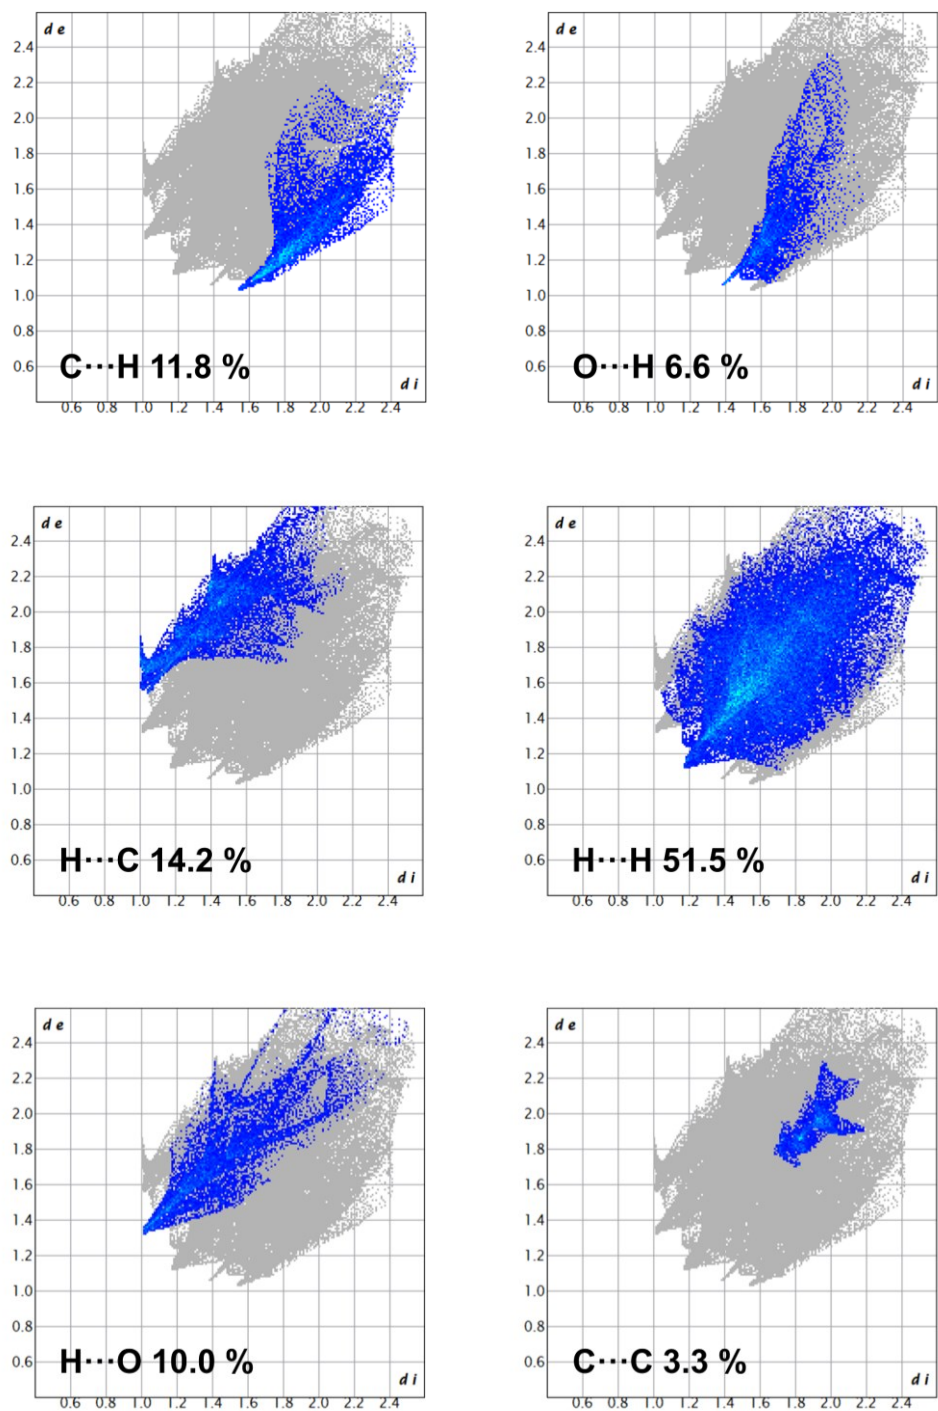

**Figure S57.** The 2D Hirshfeld fingerprints of (G14)

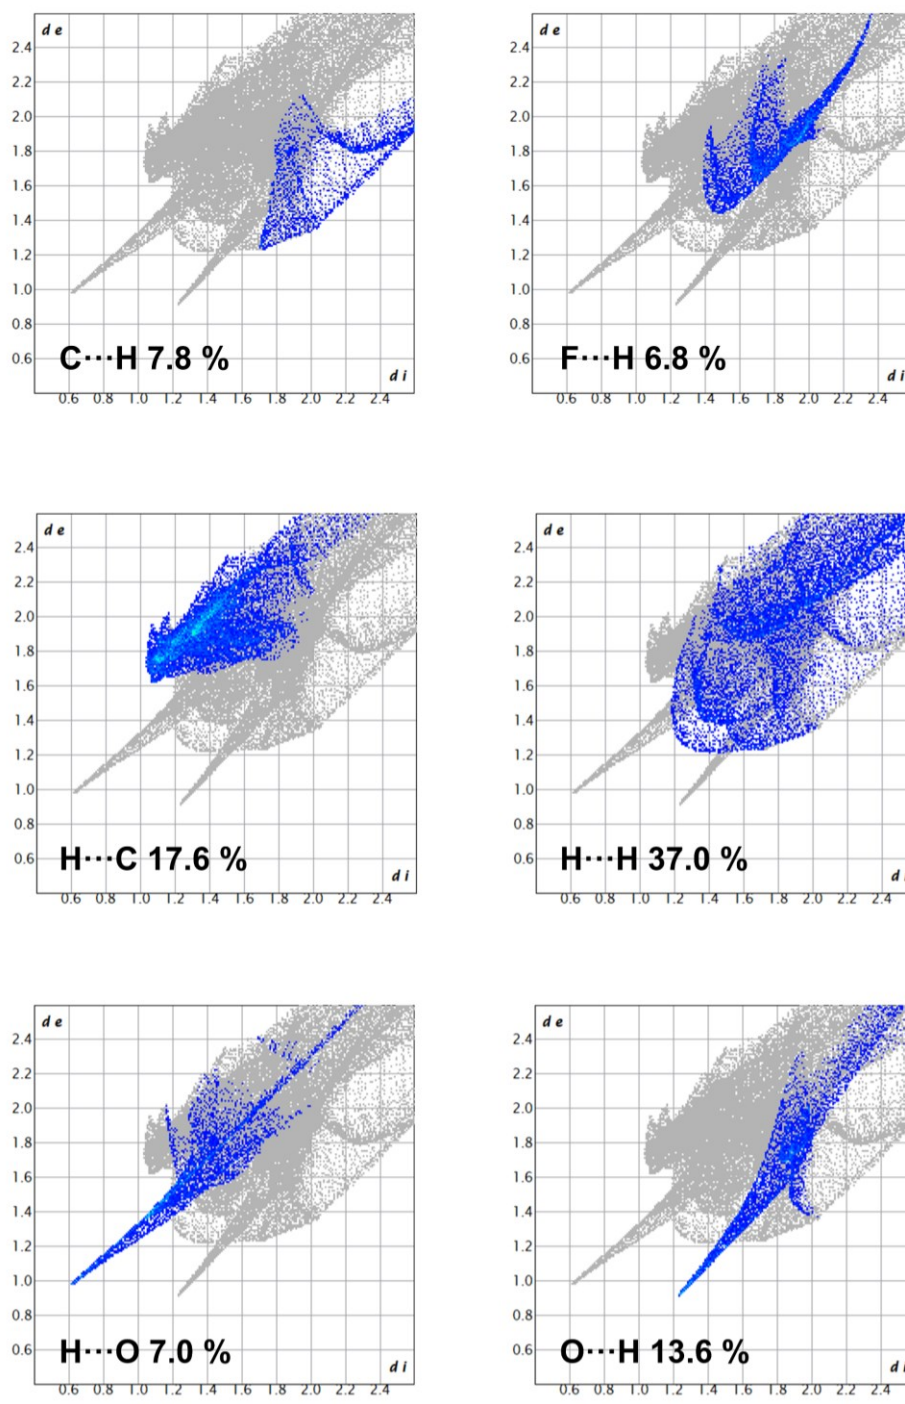

**Figure S58.** The 2D Hirshfeld fingerprints of (G15)

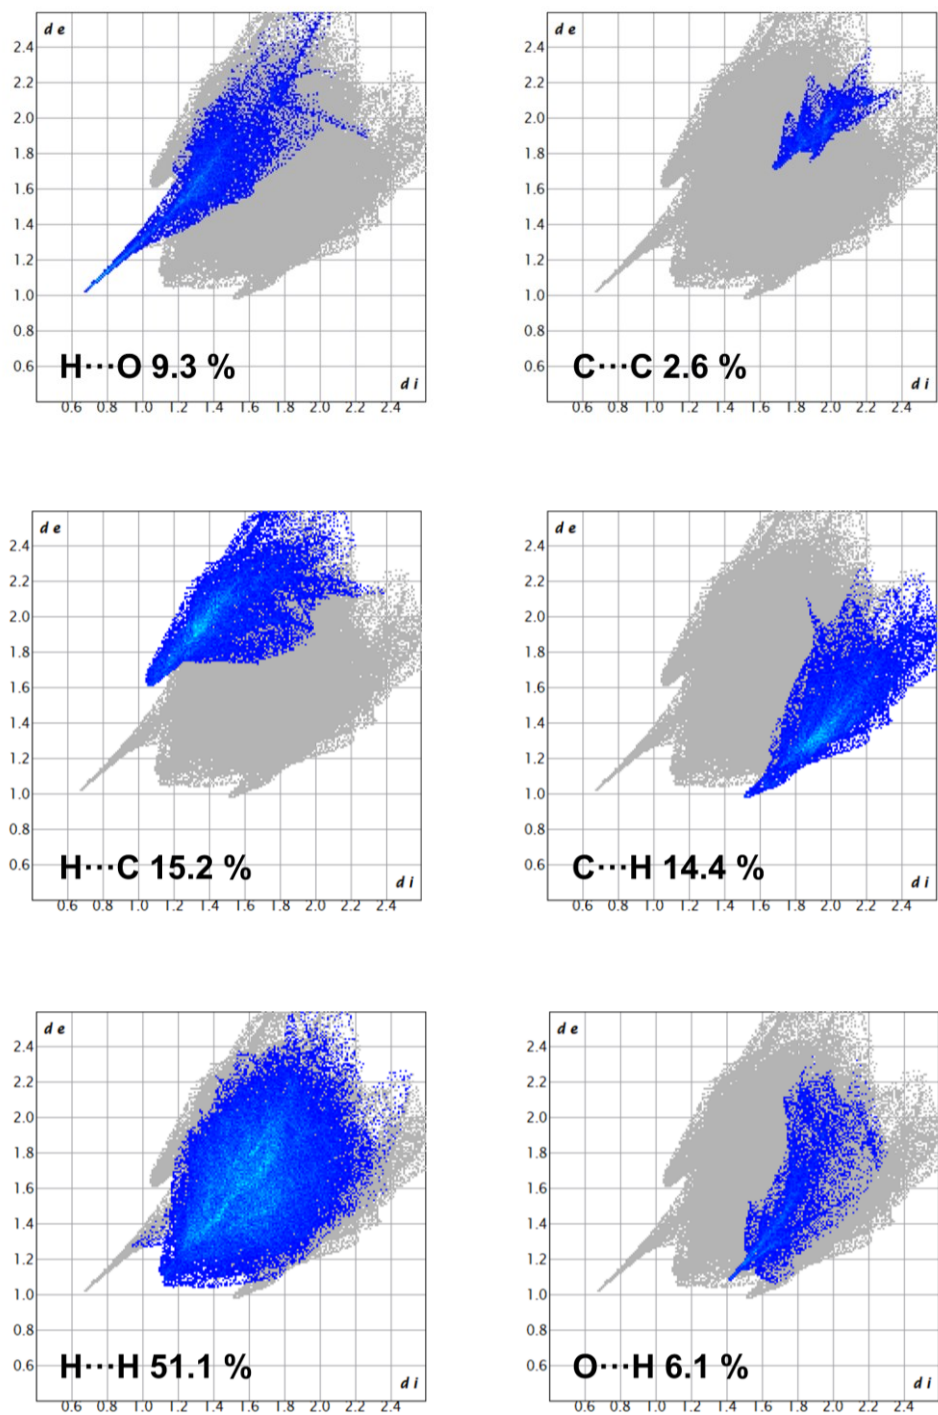

**Figure S59.** The 2D Hirshfeld fingerprints of (G16)

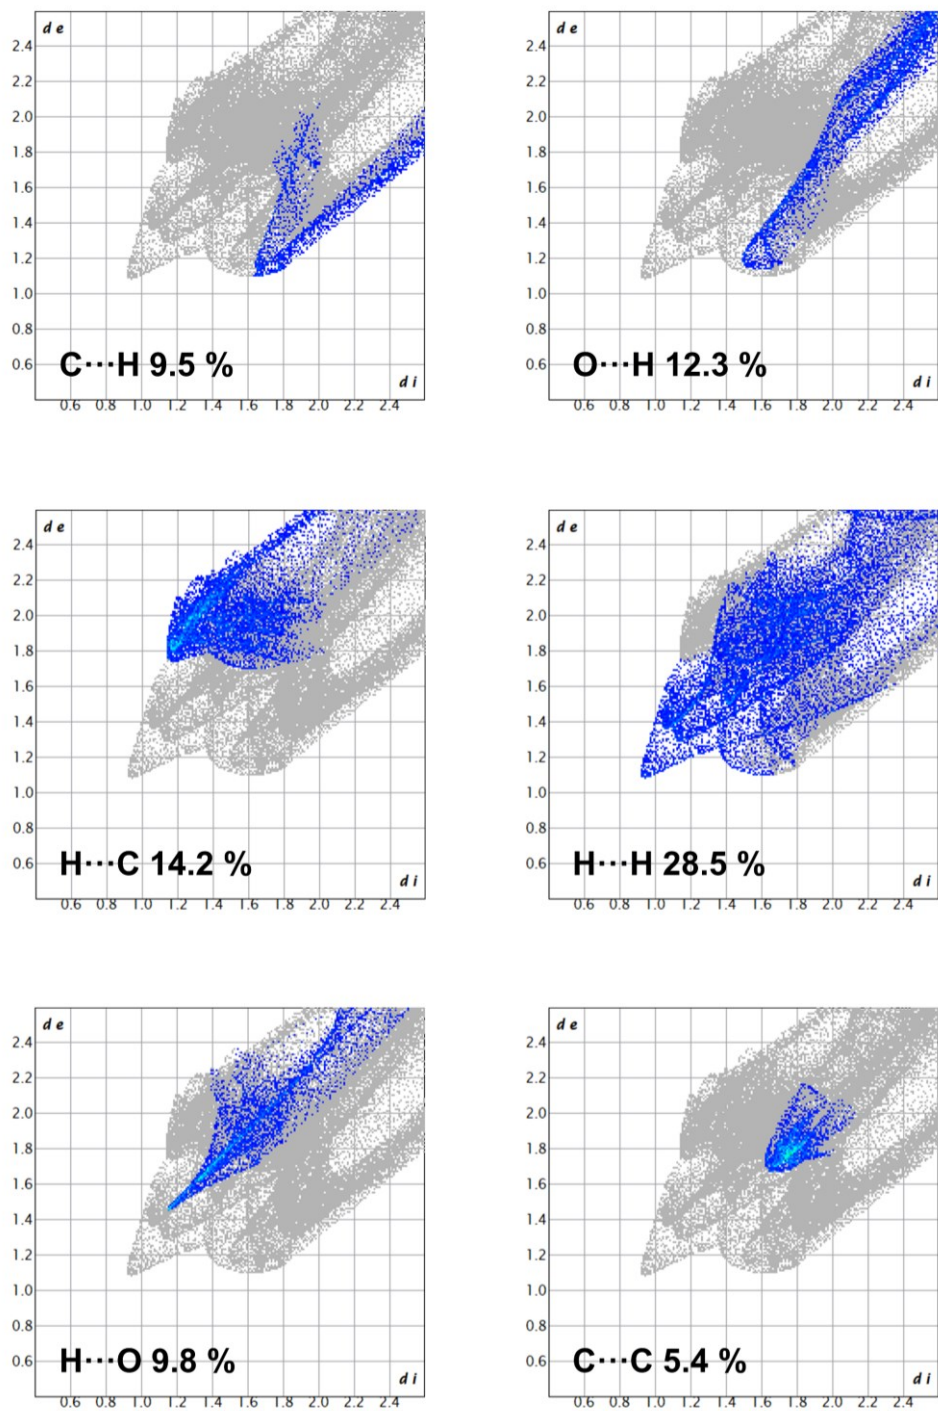

**Figure S60.** The 2D Hirshfeld fingerprints of (G17)

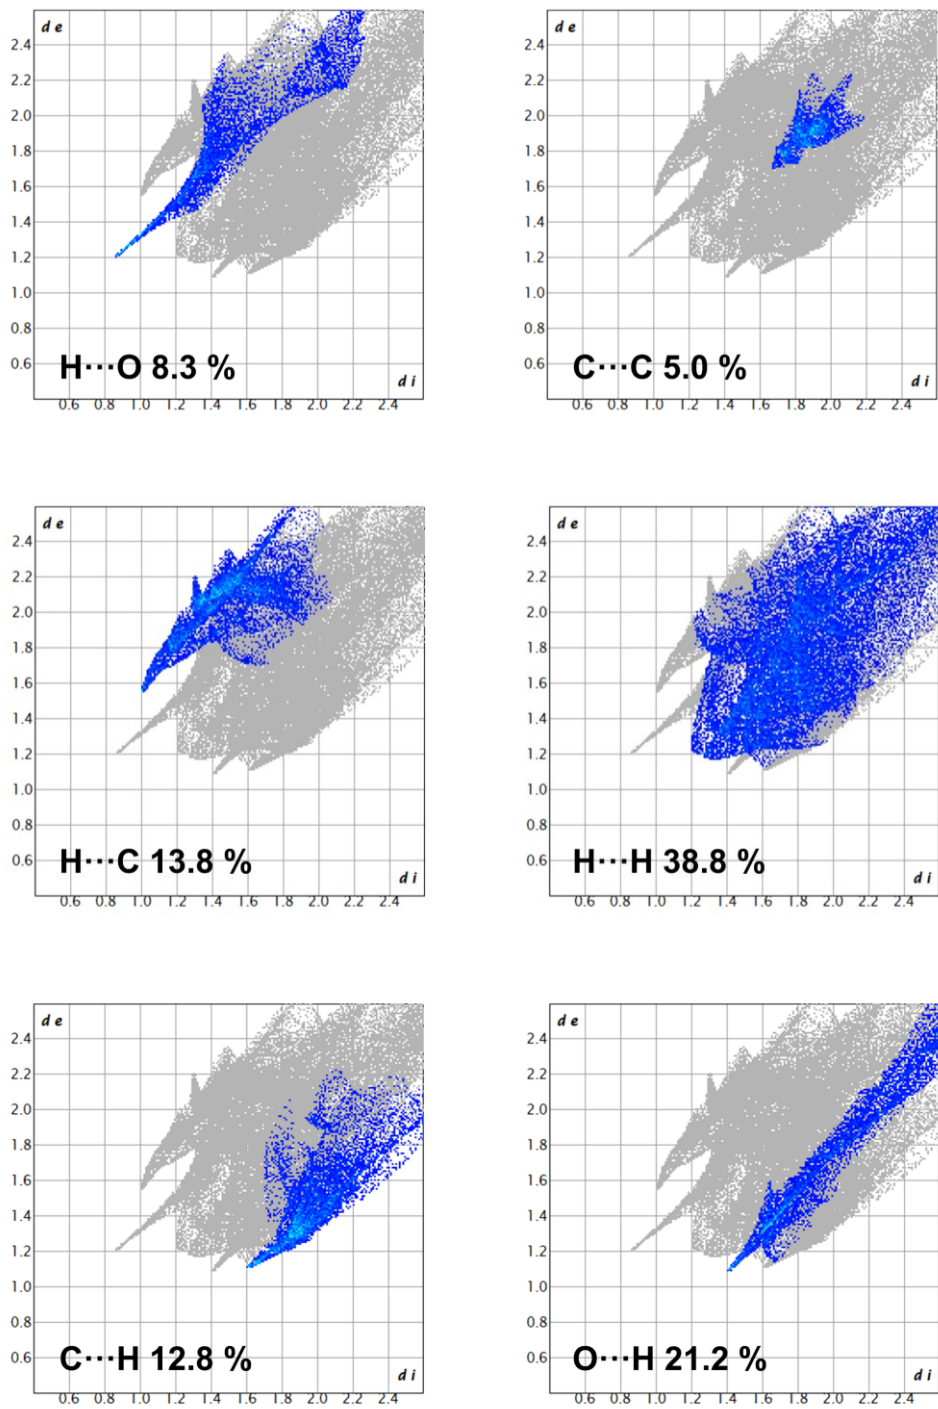

**Figure S61.** The 2D Hirshfeld fingerprints of (G18)

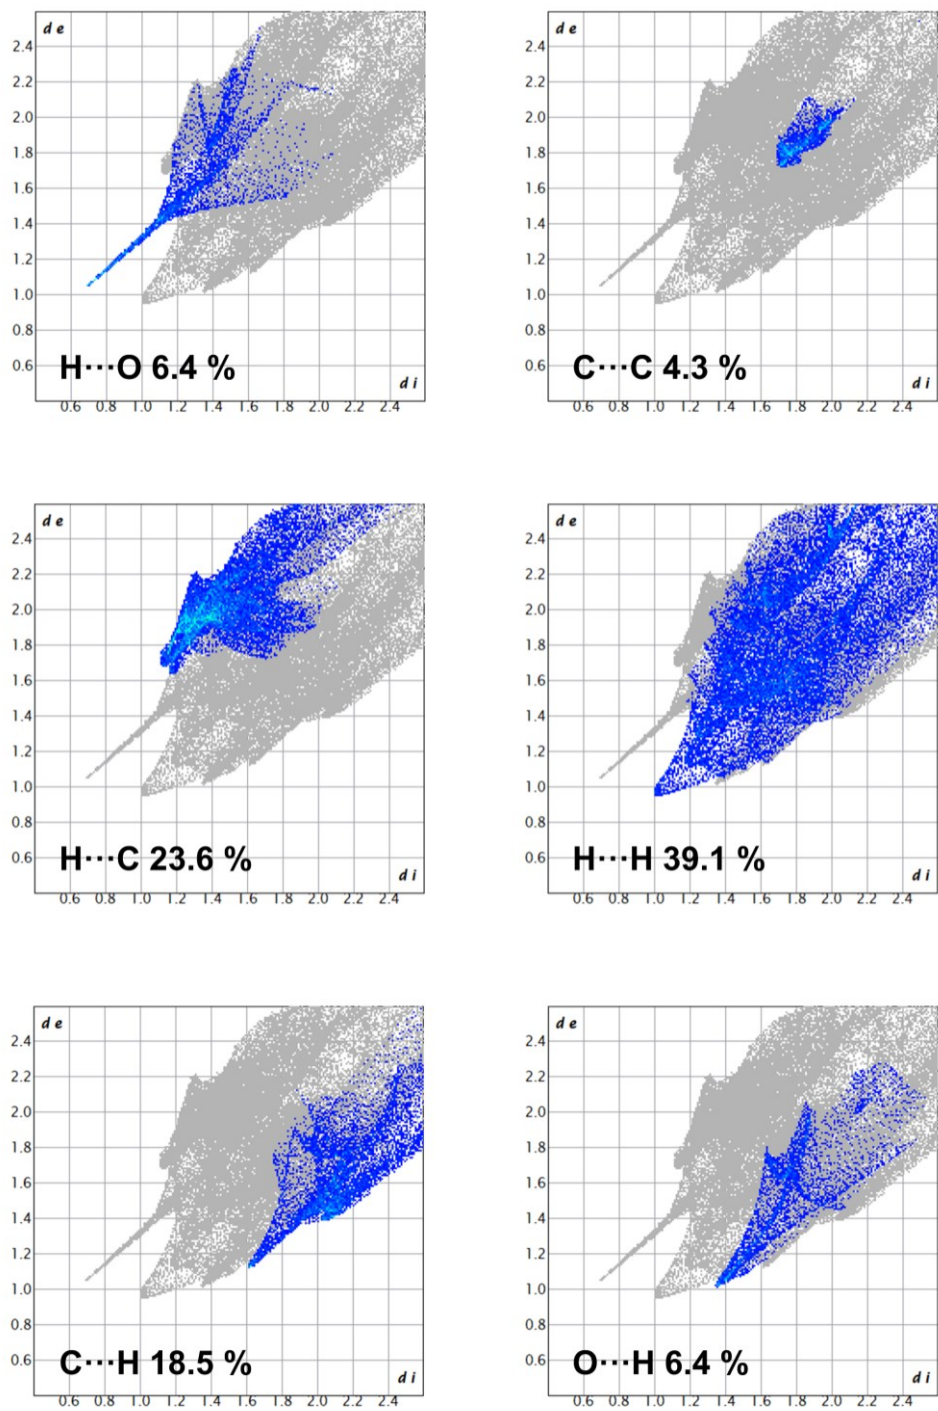

**Figure S62.** The 2D Hirshfeld fingerprints of (G19)

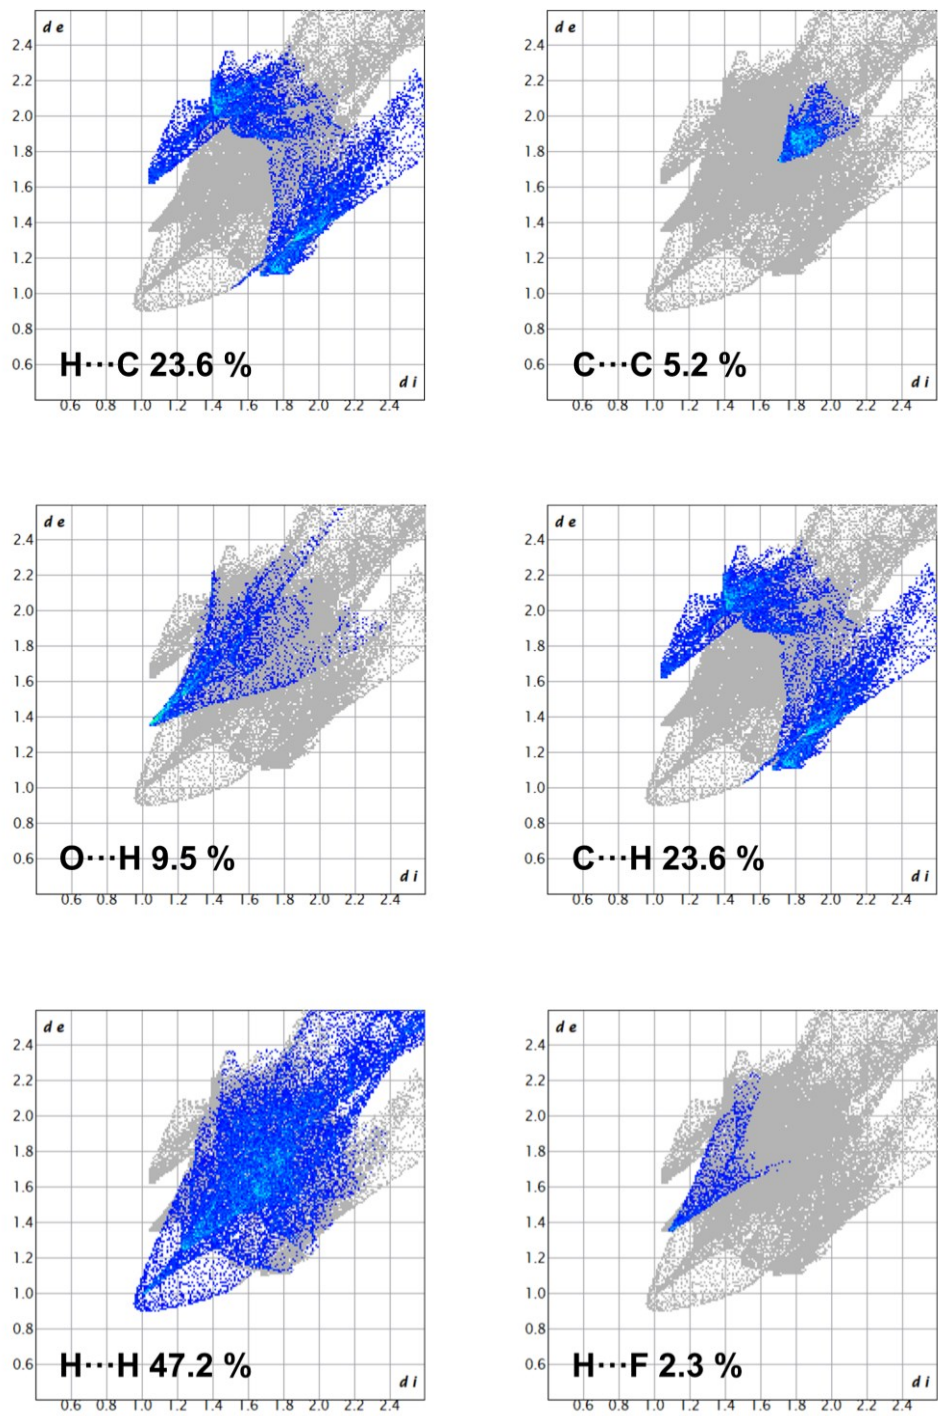

**Figure S63.** The 2D Hirshfeld fingerprints of (G20)

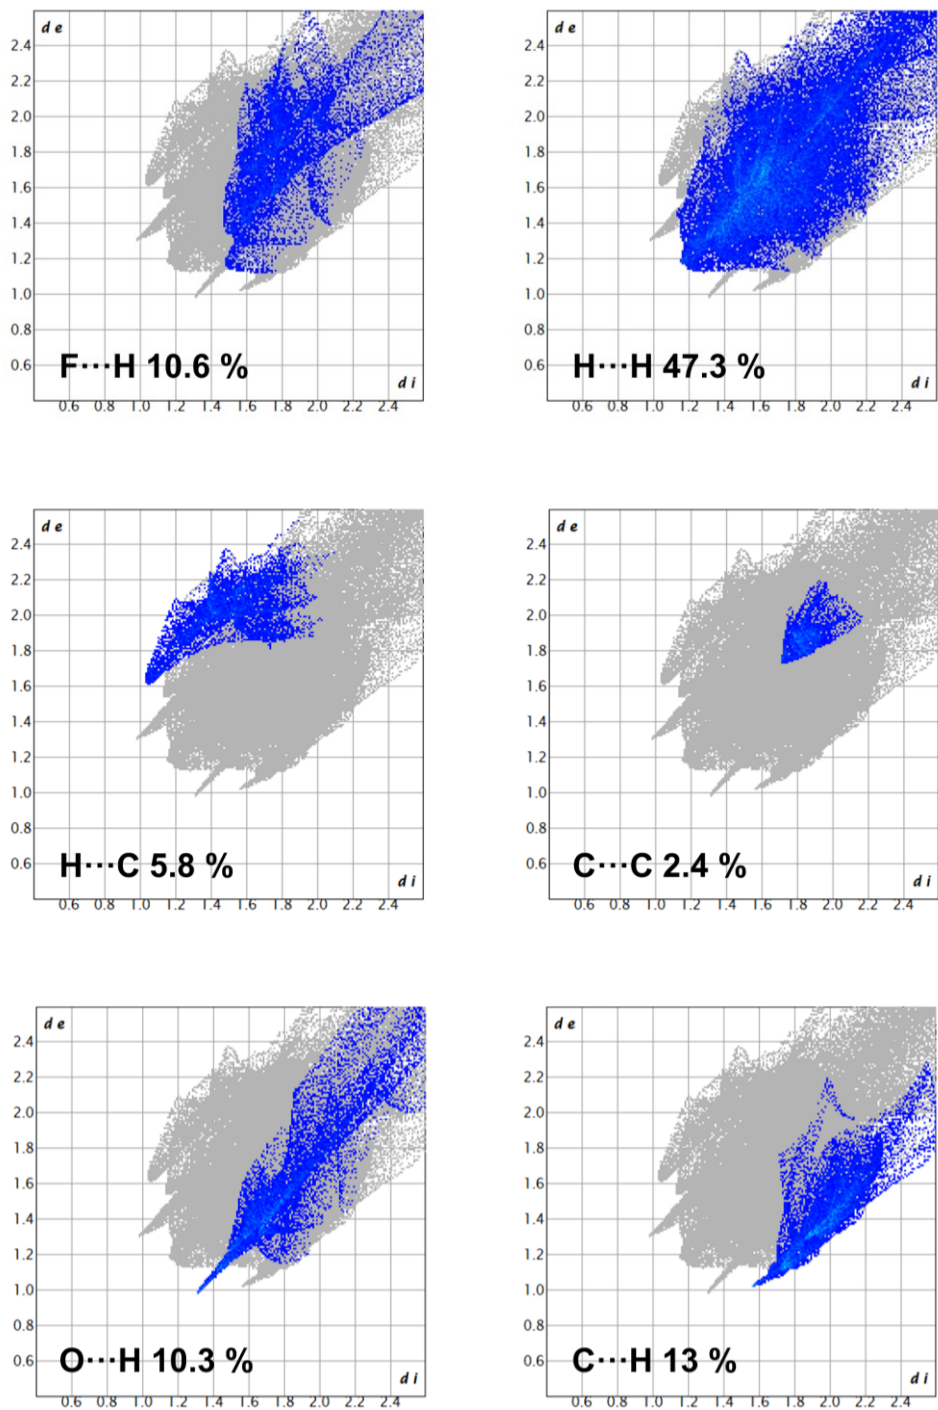

**Figure S64.** The 2D Hirshfeld fingerprints of (G21)



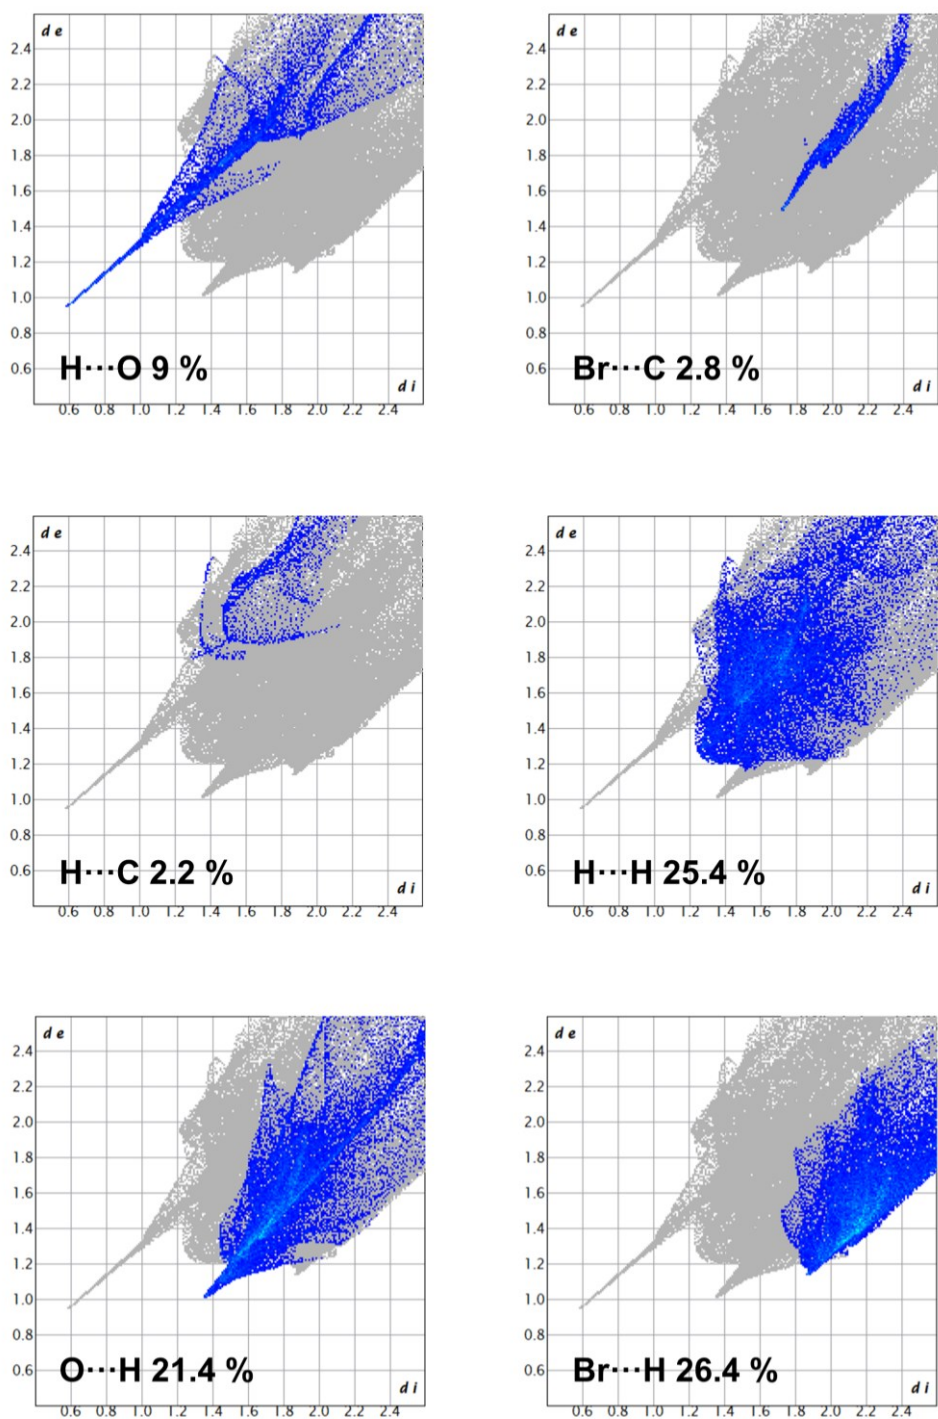

**Figure S65.** The 2D Hirshfeld fingerprints of (G22)

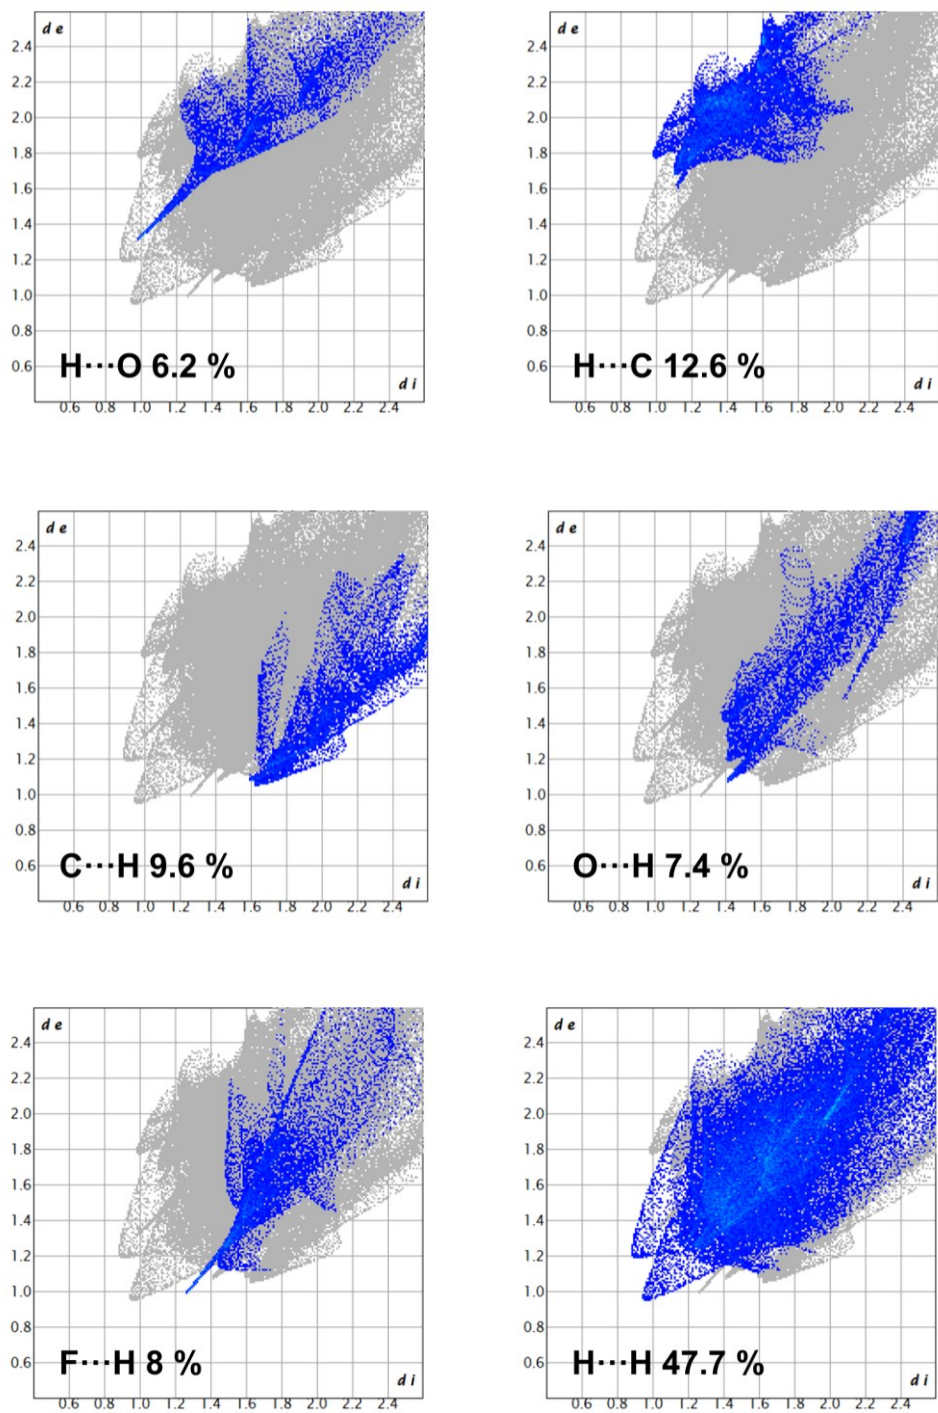

**Figure S66.** The 2D Hirshfeld fingerprints of (G23)

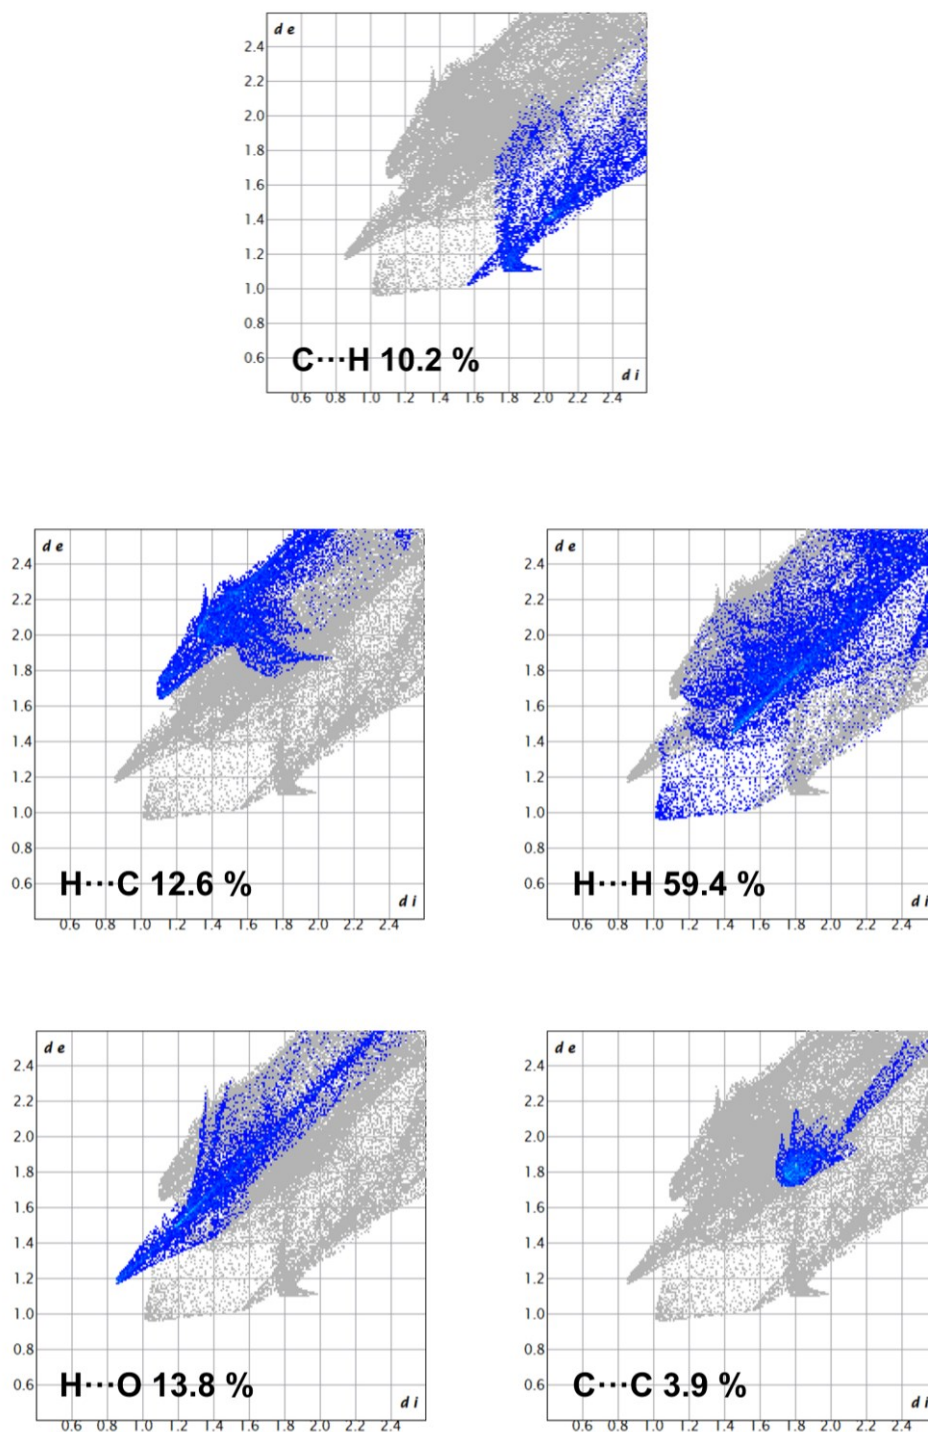

**Figure S67.** The 2D Hirshfeld fingerprints of (G24)

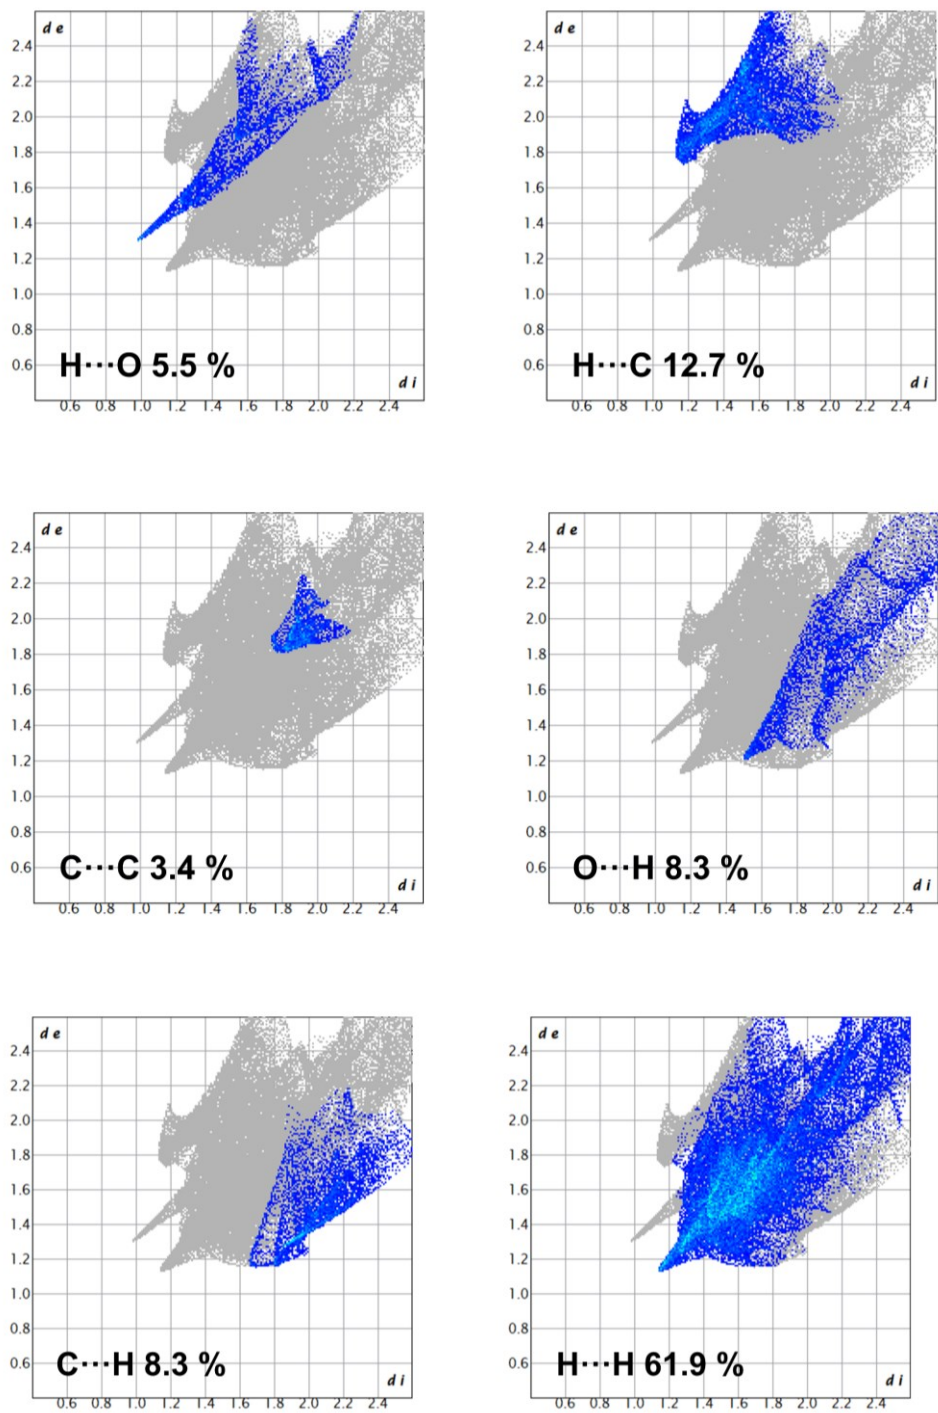

**Figure S68.** The 2D Hirshfeld fingerprints of (G25)

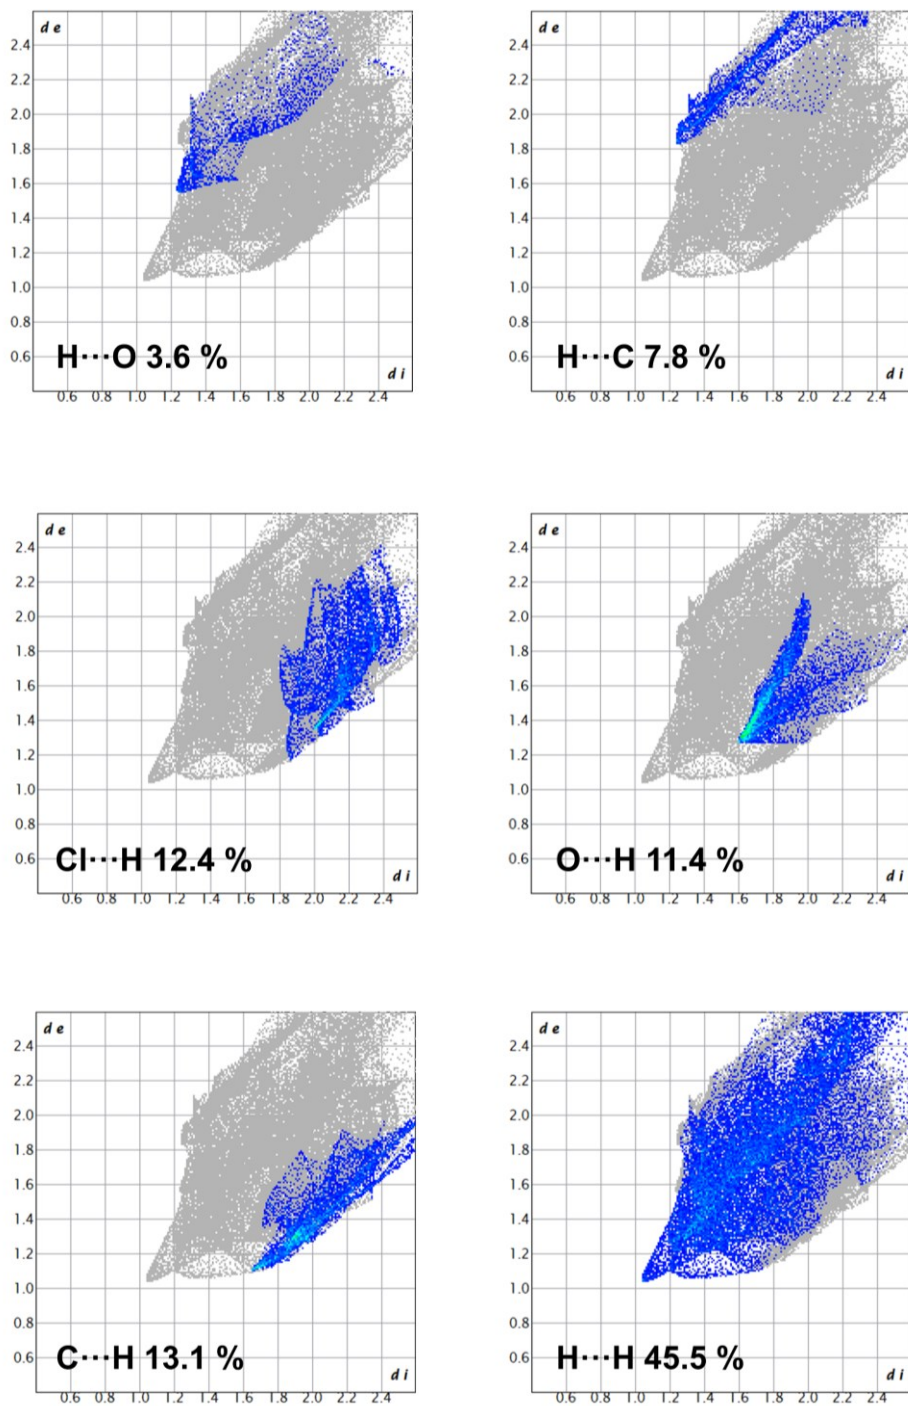

**Figure S69.** The 2D Hirshfeld fingerprints of (G26)

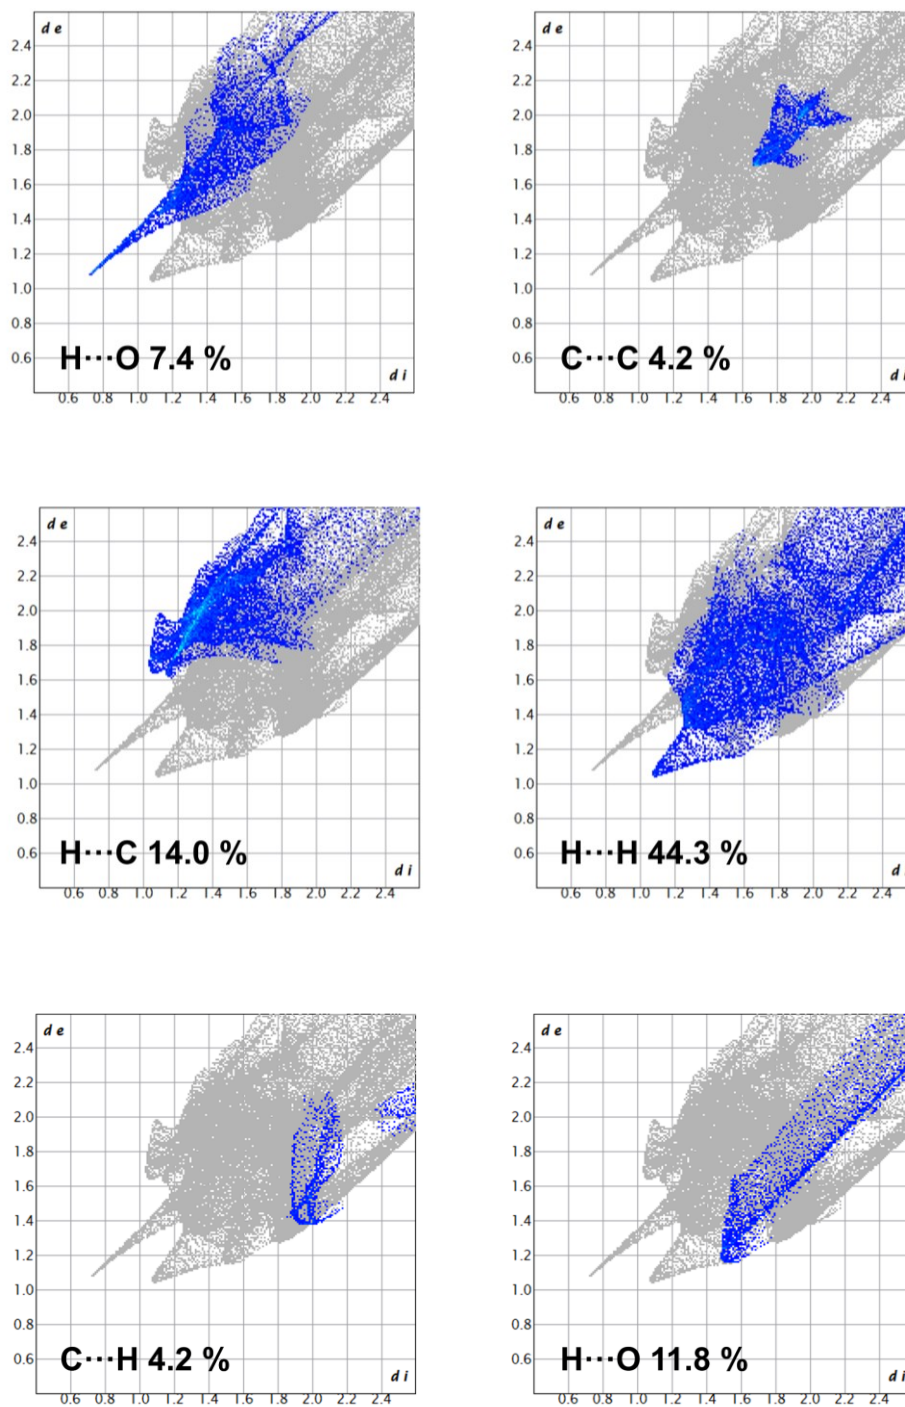

**Figure S70.** The 2D Hirshfeld fingerprints of (G27)

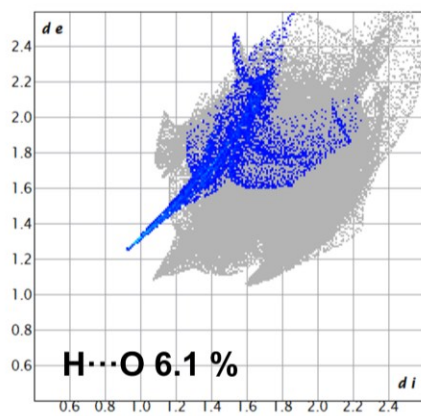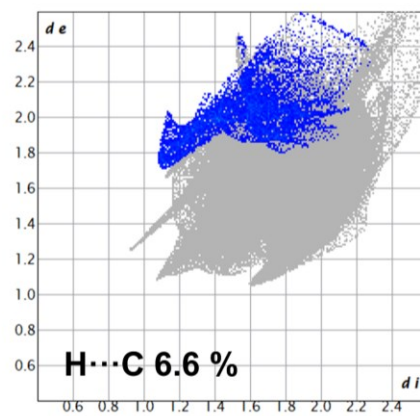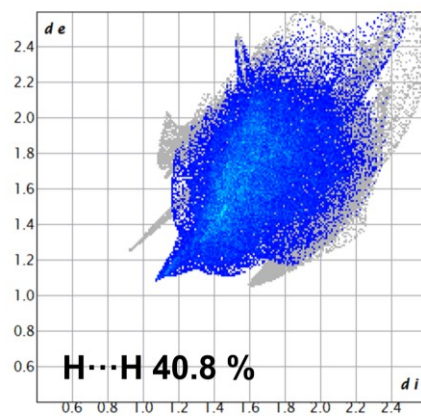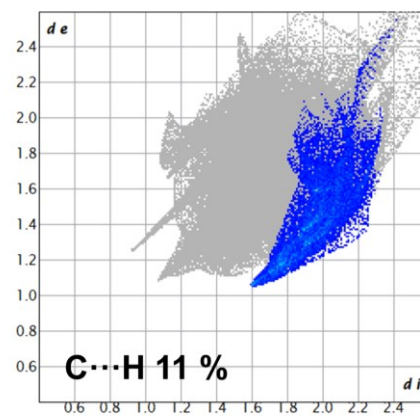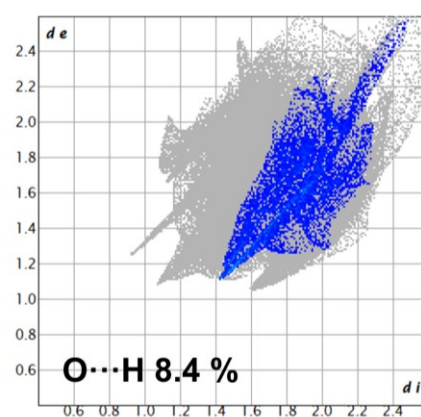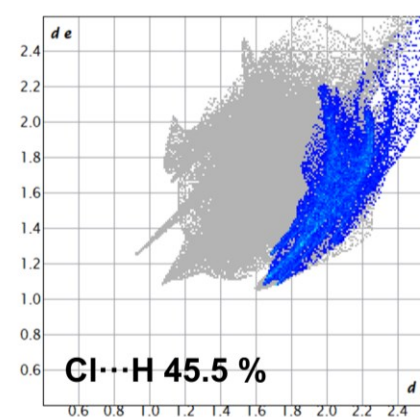

**Figure S71. The 2D Hirshfeld fingerprints of (G28)**

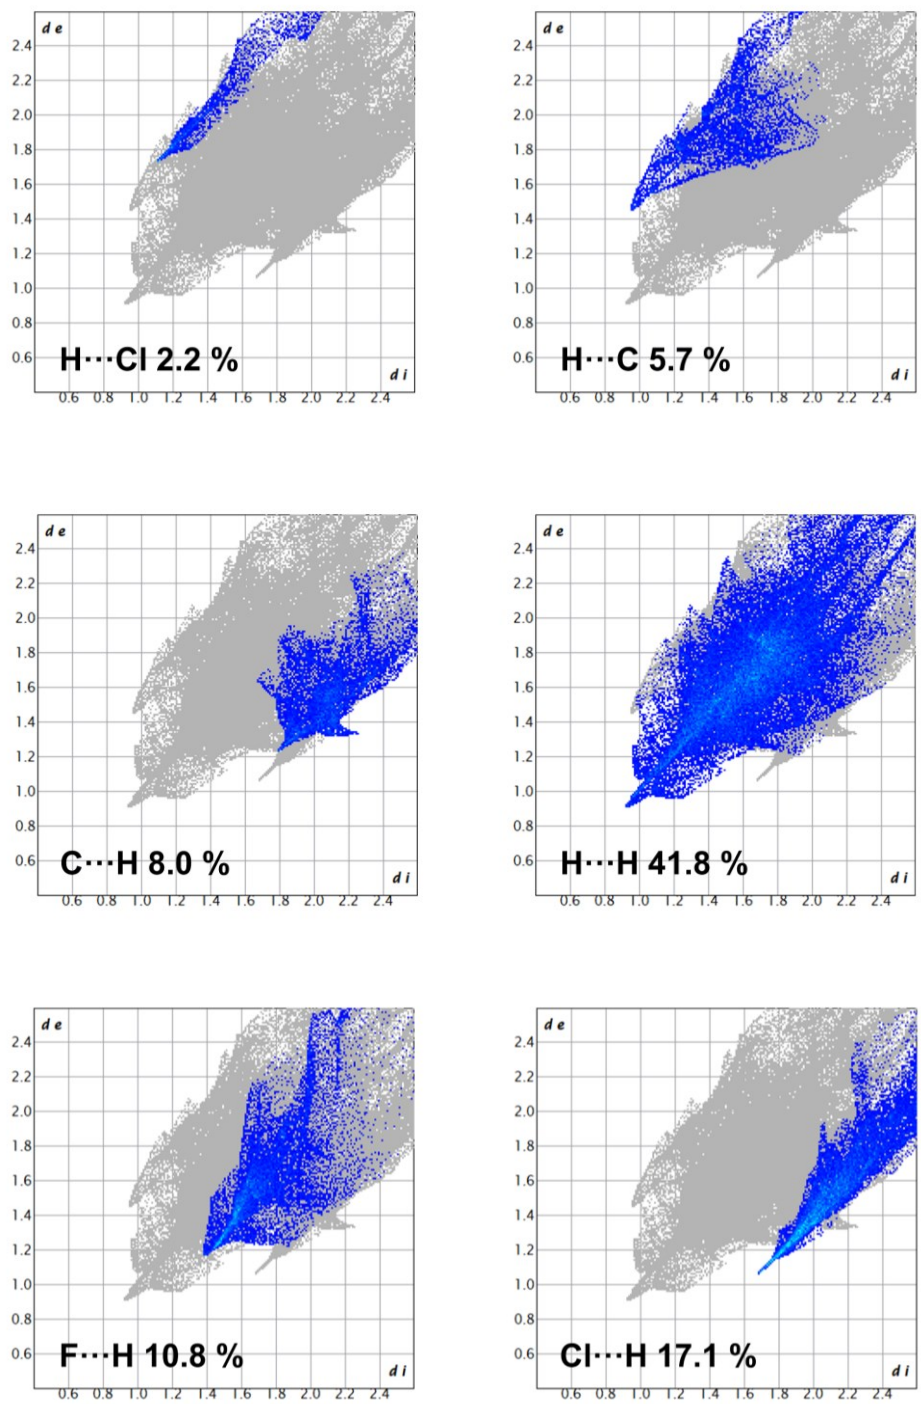

**Figure S72.** The 2D Hirshfeld fingerprints of (G29)



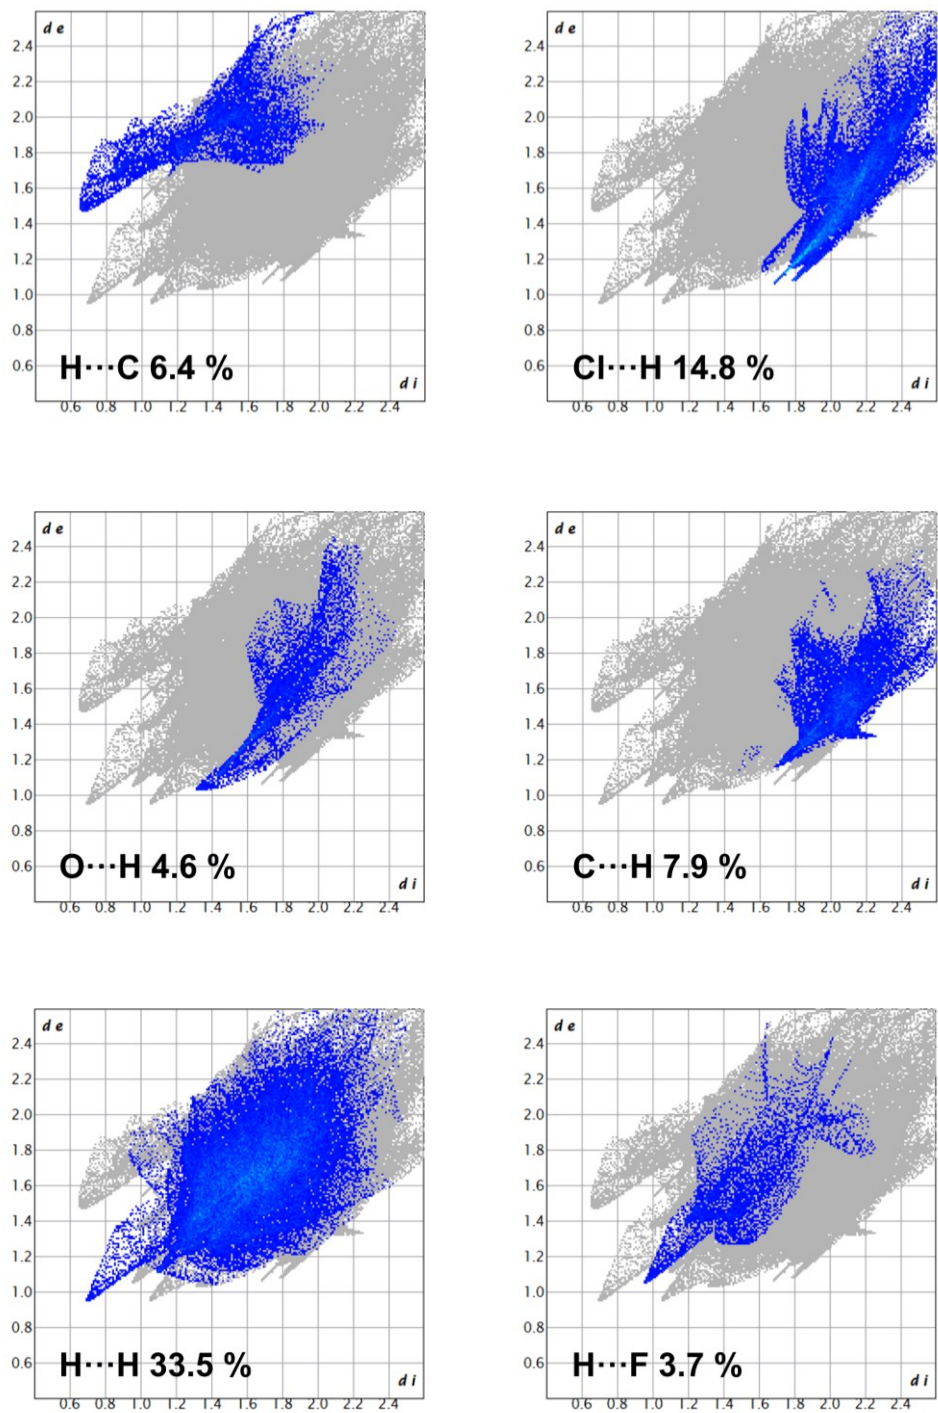

**Figure S73.** The 2D Hirshfeld fingerprints of (G30)

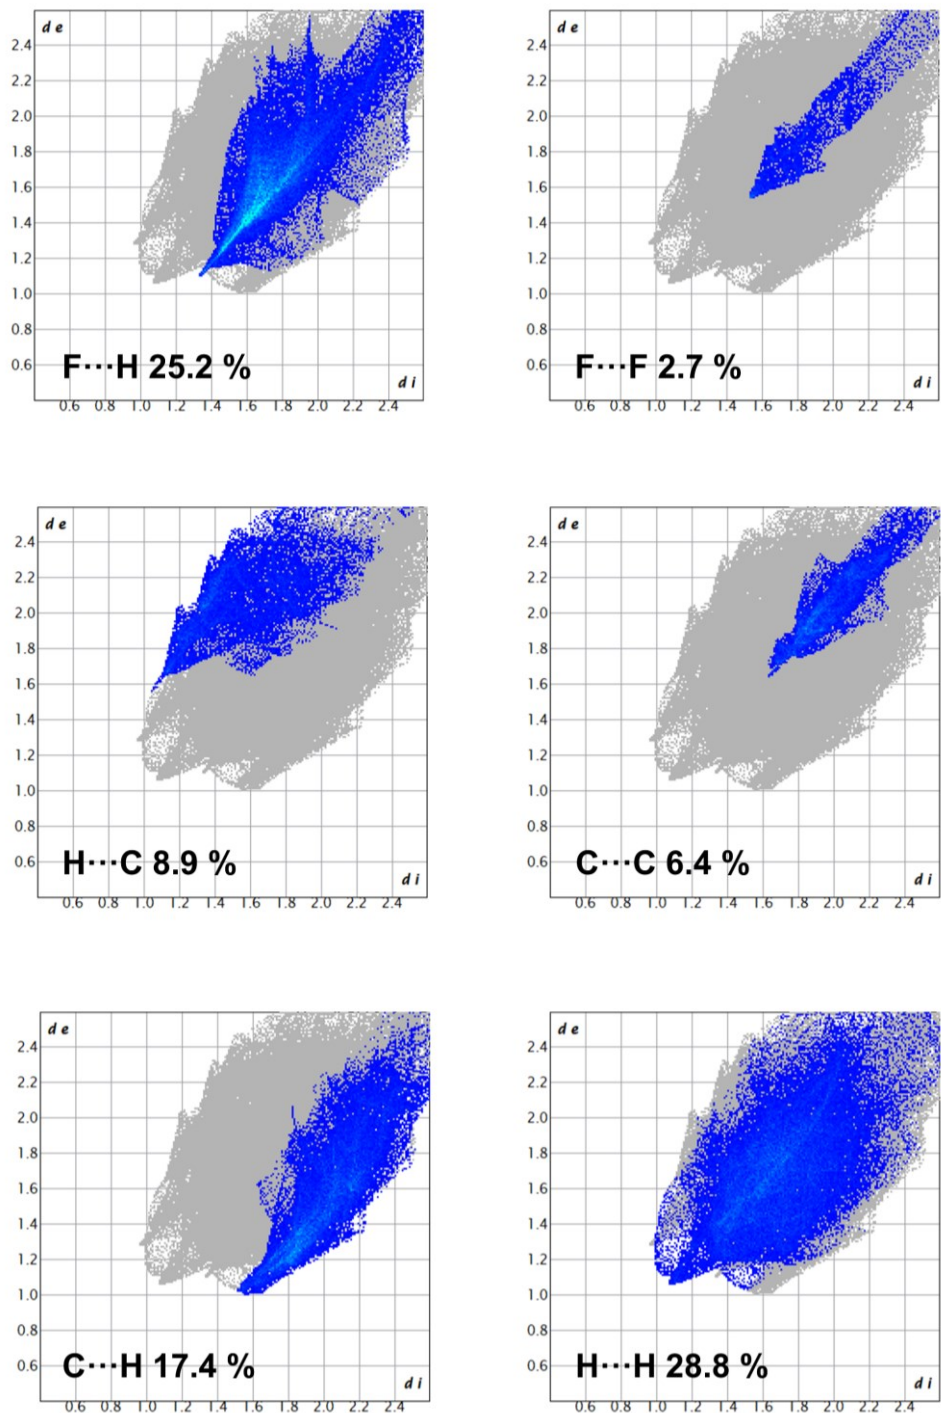

**Figure S74.** The 2D Hirshfeld fingerprints of (G31)

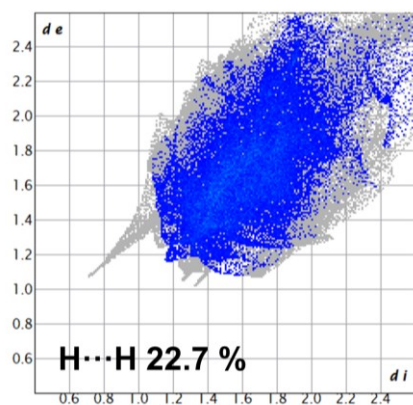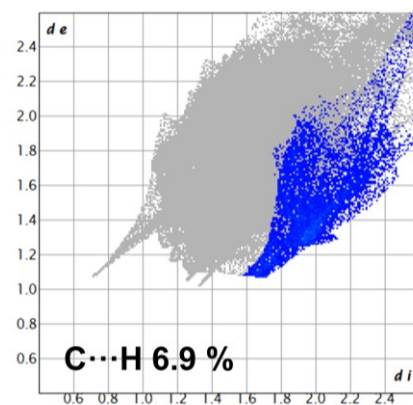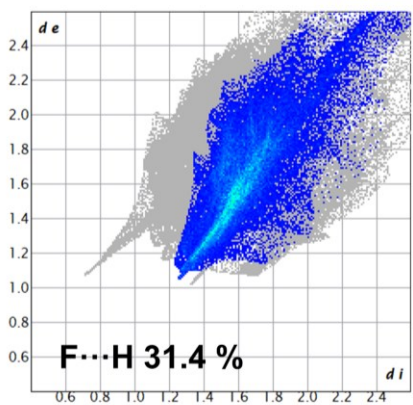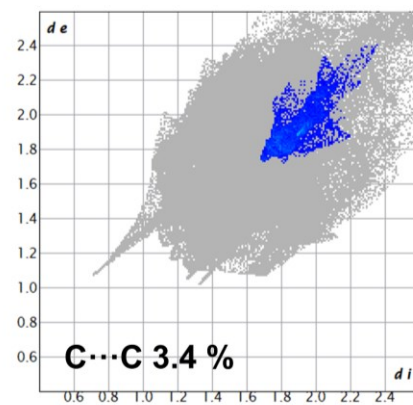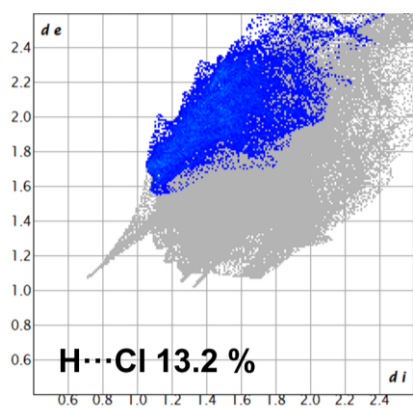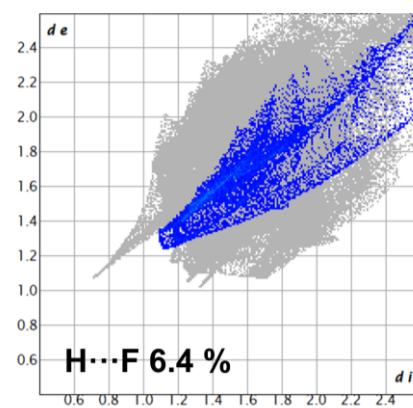

**Figure S75.**The 2D Hirshfeld fingerprints of (G32)

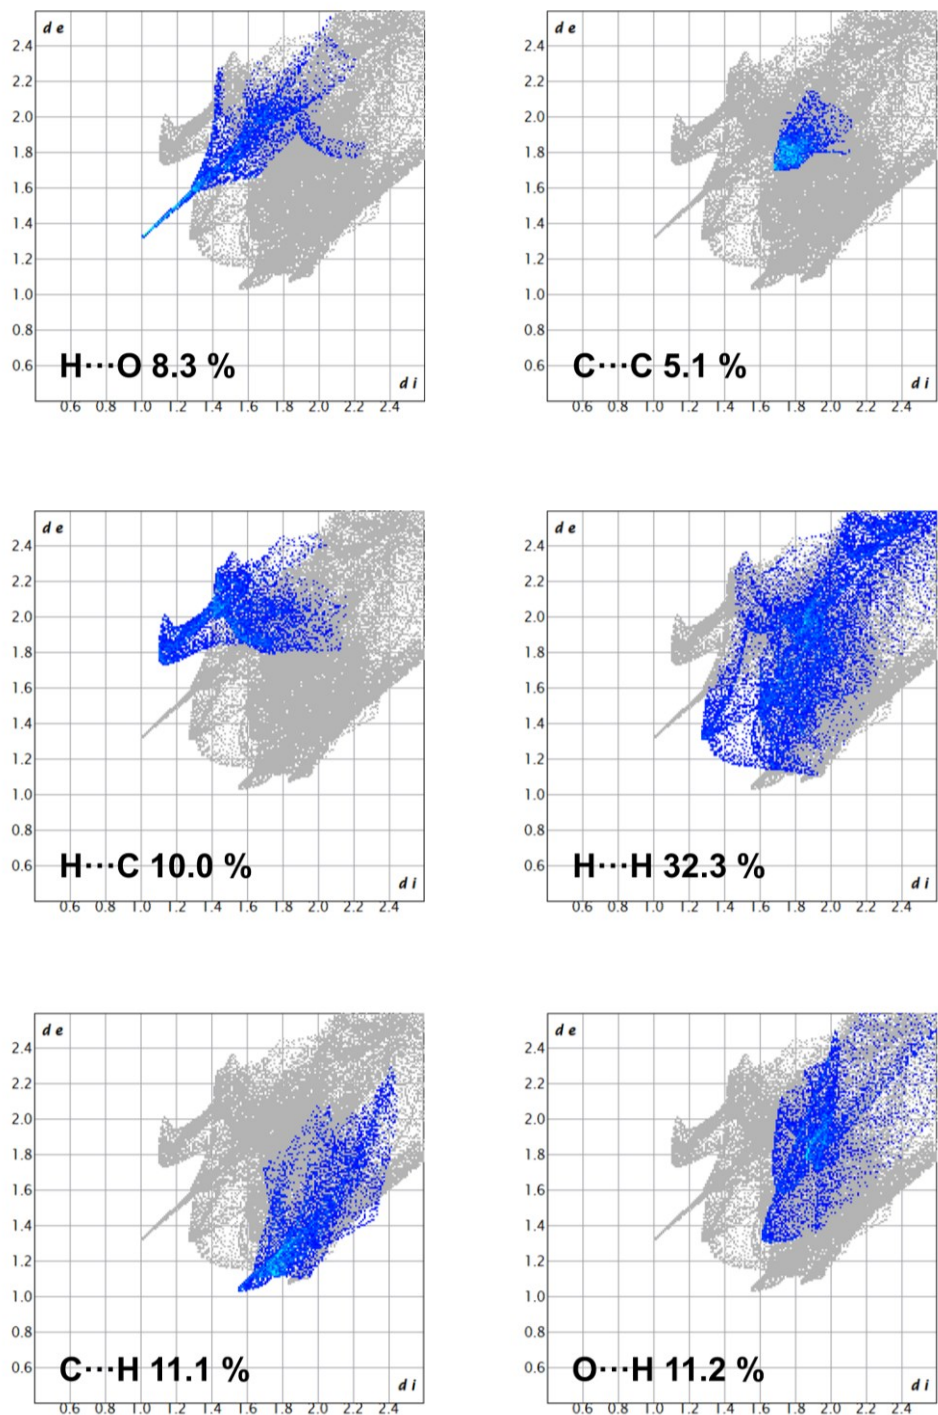

**Figure S76.** The 2D Hirshfeld fingerprints of (G33)

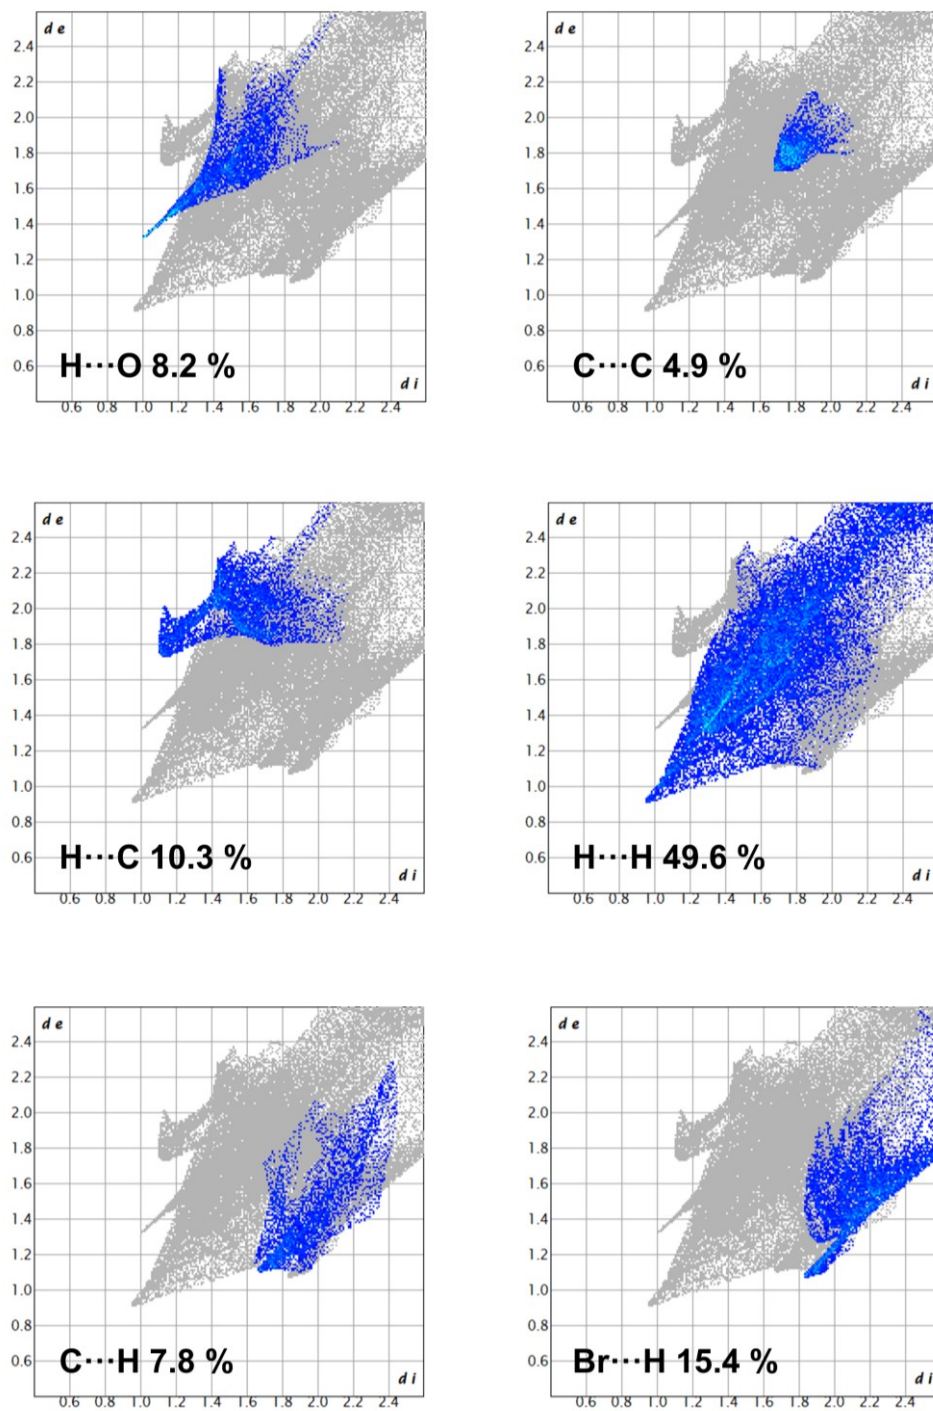

**Figure S77.** The 2D Hirshfeld fingerprints of (G34)

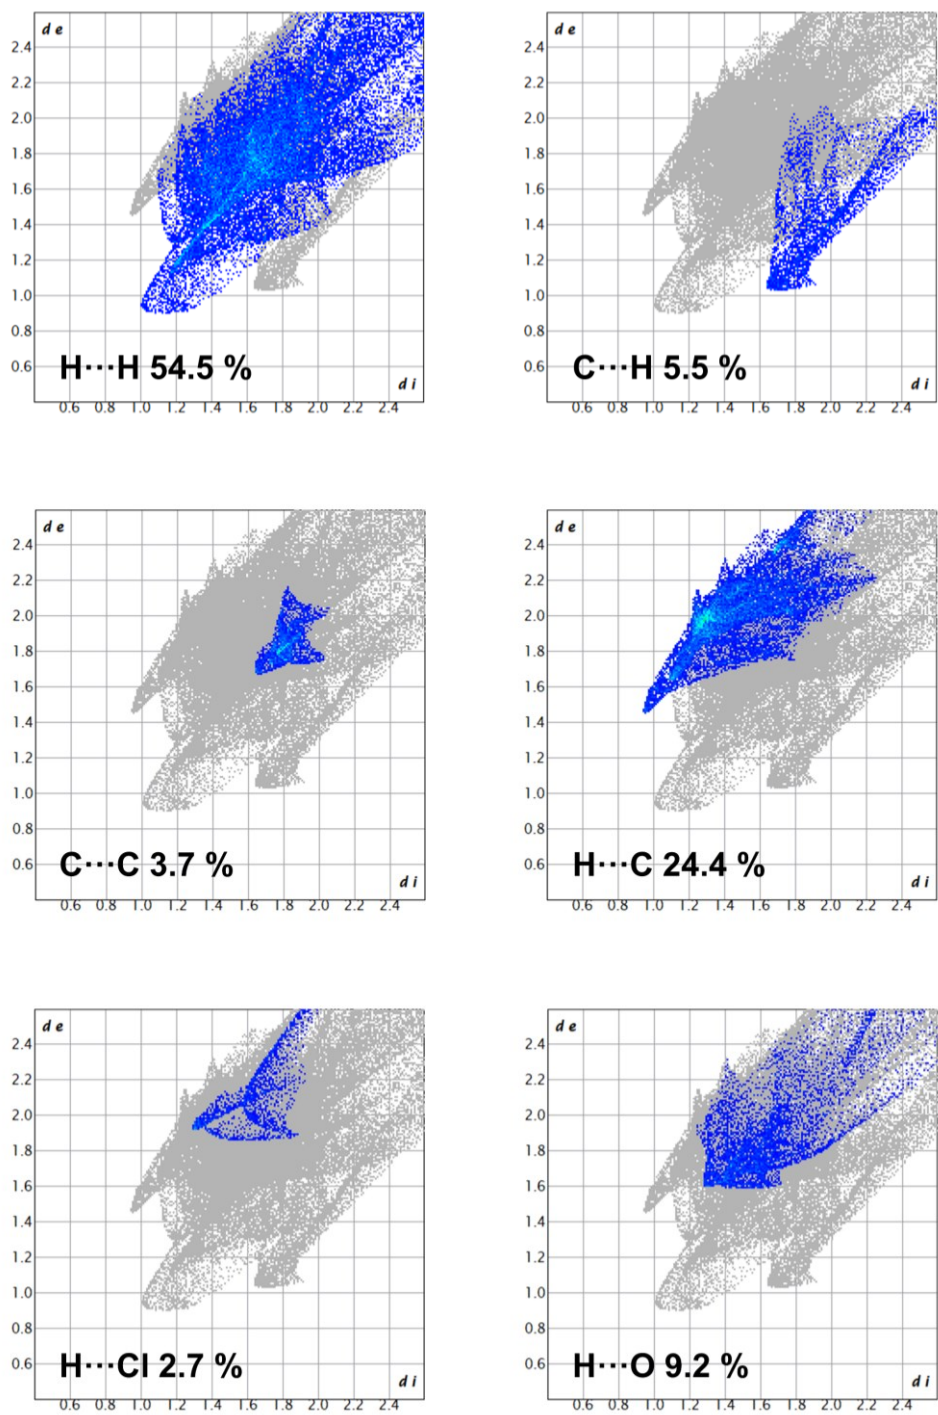

**Figure S78.** The 2D Hirshfeld fingerprints of (G35)

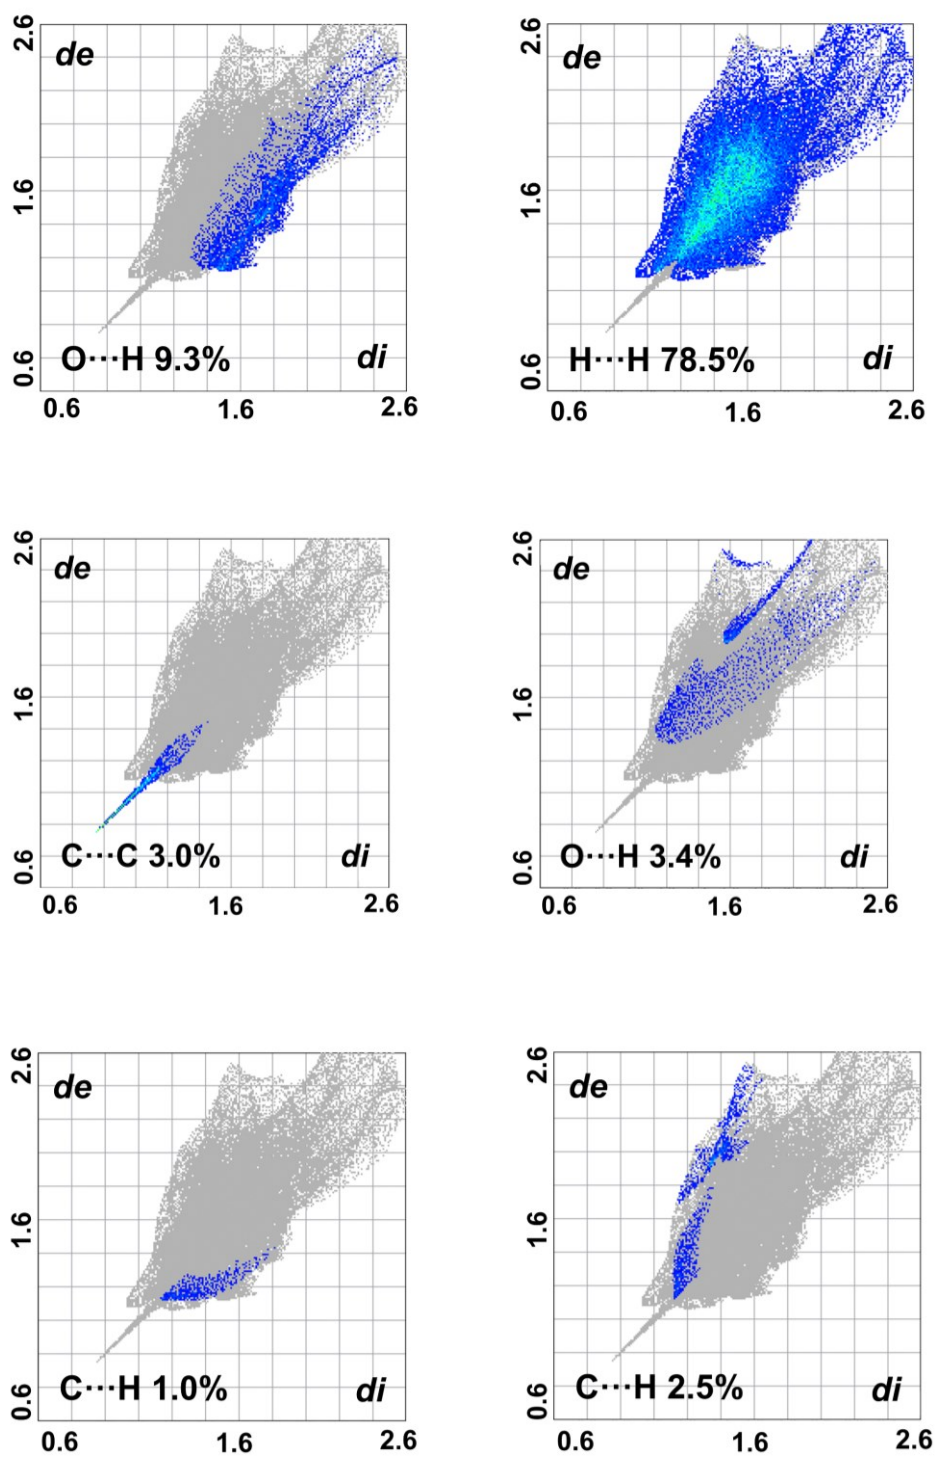

**Figure S79.** The 2D Hirshfeld fingerprints of (G36)

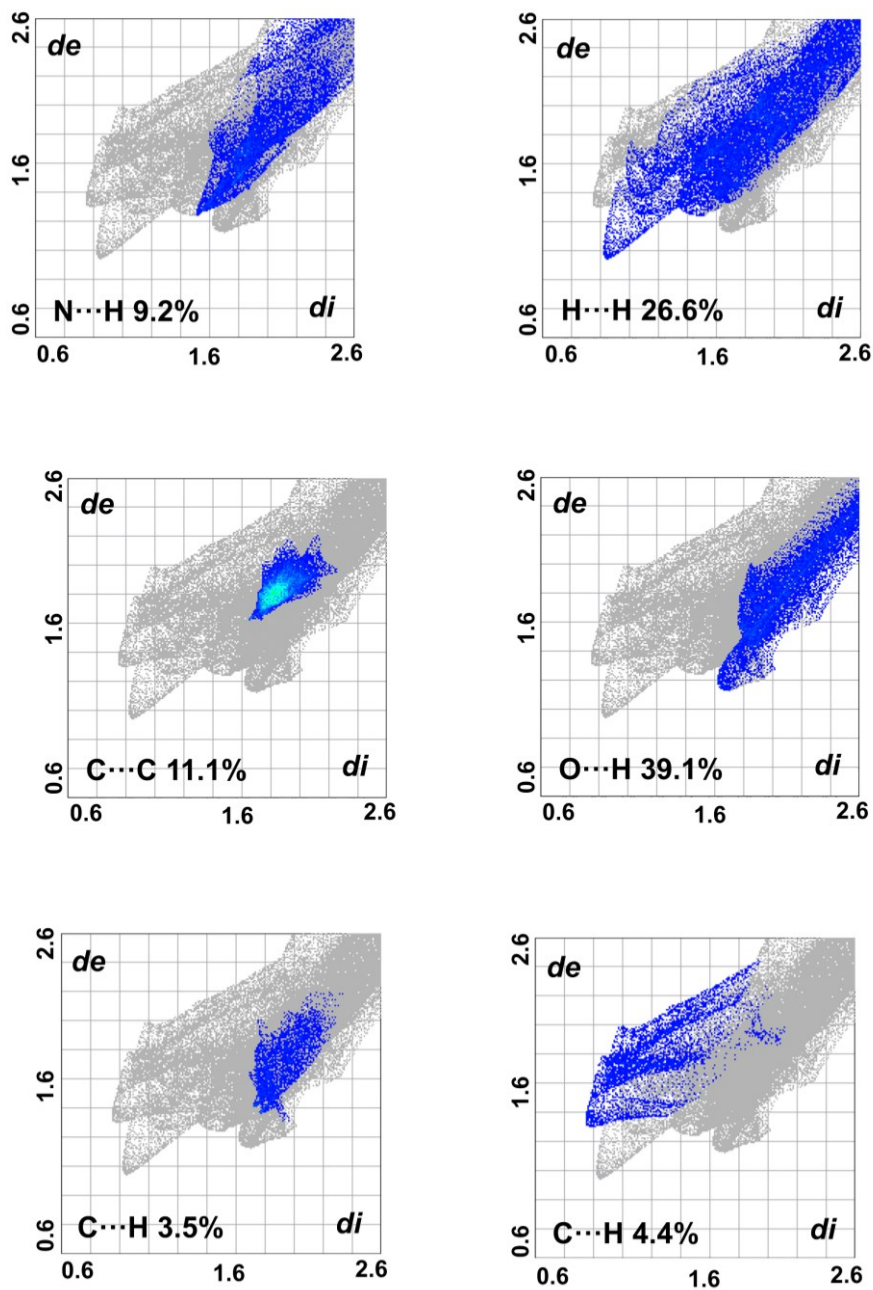

**Figure S80.** The 2D Hirshfeld fingerprints of (G37)



## 7. DFT-calculated ESP surfaces of all guests

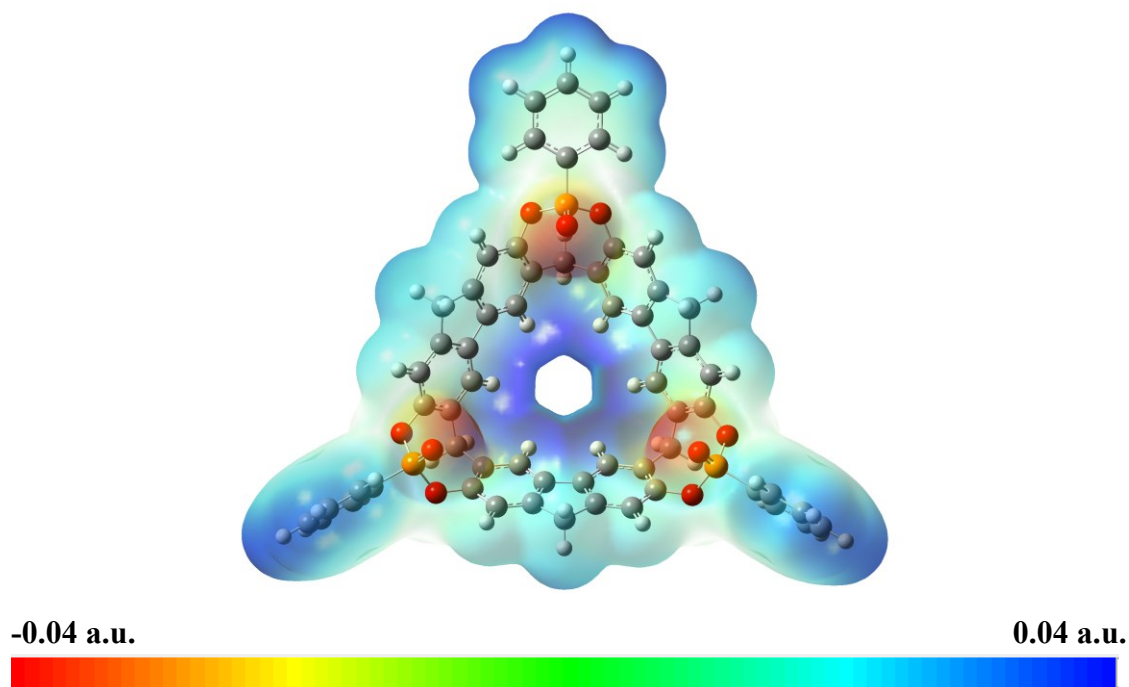

Figure S81. DFT-calculated ESP surfaces of F[3]A1-[P(O)Ph]<sub>3</sub>

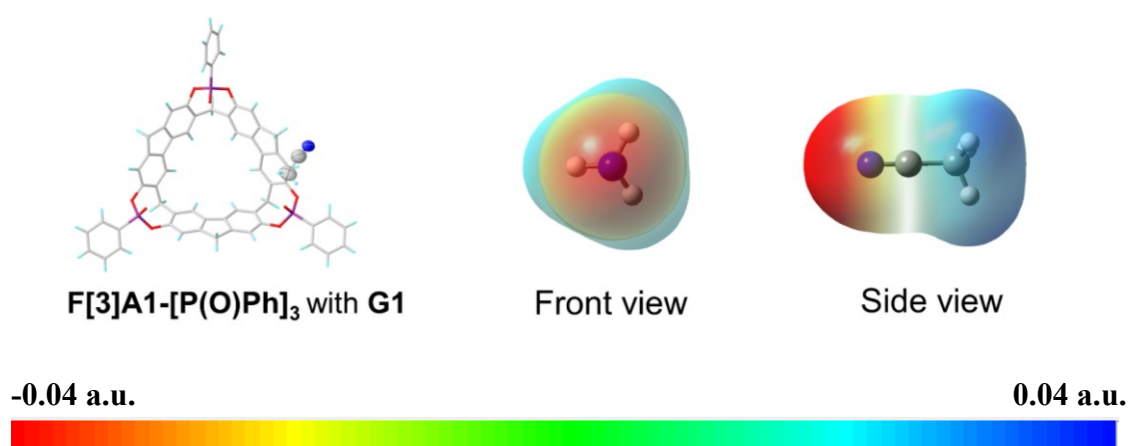

Figure S82. DFT-calculated ESP surfaces of G1

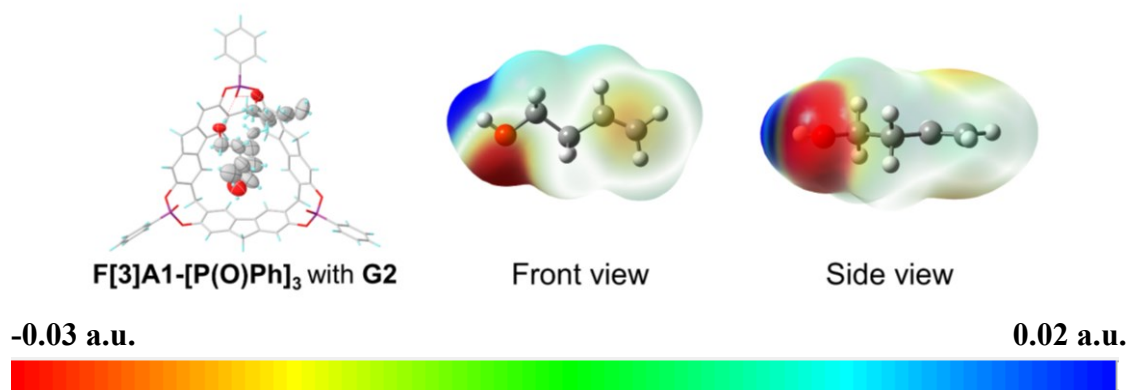

**Figure S83. DFT-calculated ESP surfaces of G2**

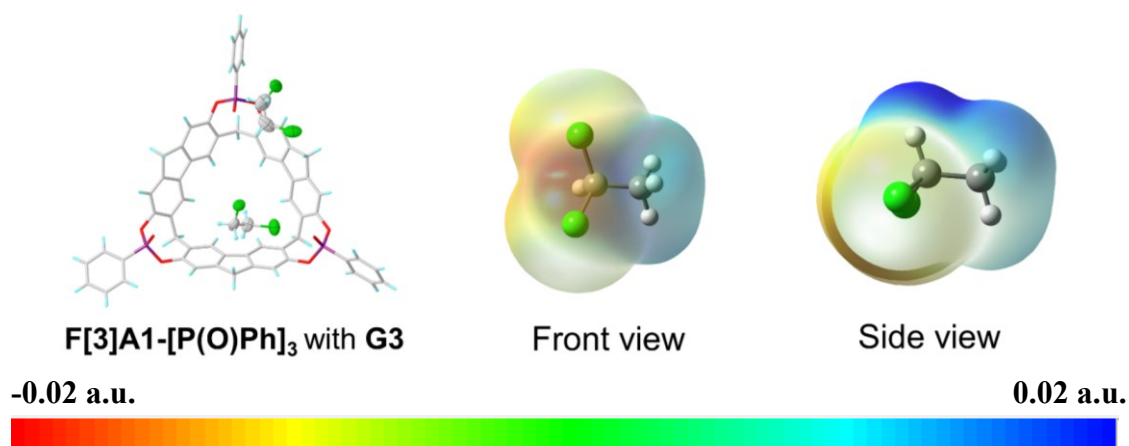

**Figure S84. DFT-calculated ESP surfaces of G3**

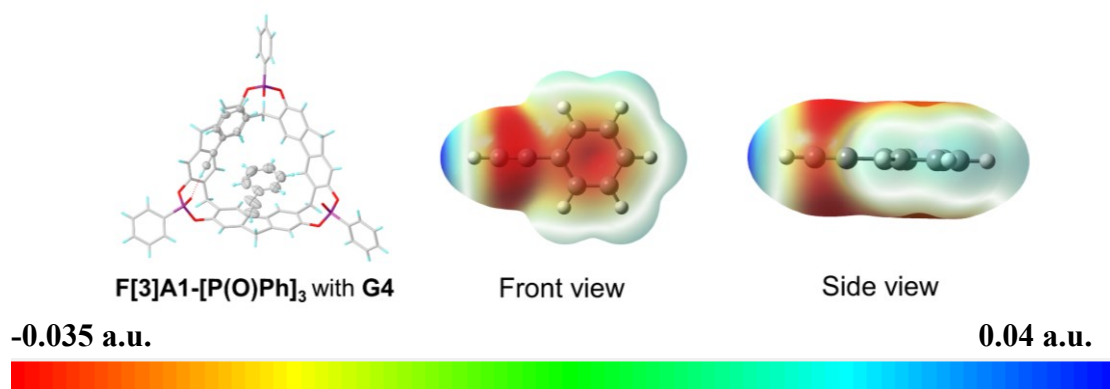

**Figure S85. DFT-calculated ESP surfaces of G4**

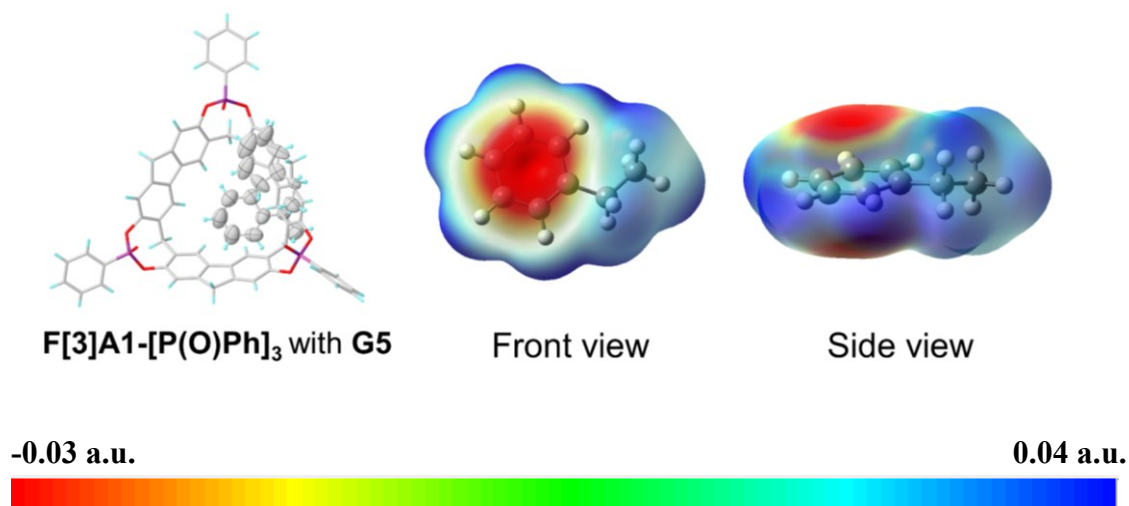

Figure S86. DFT-calculated ESP surfaces of G5

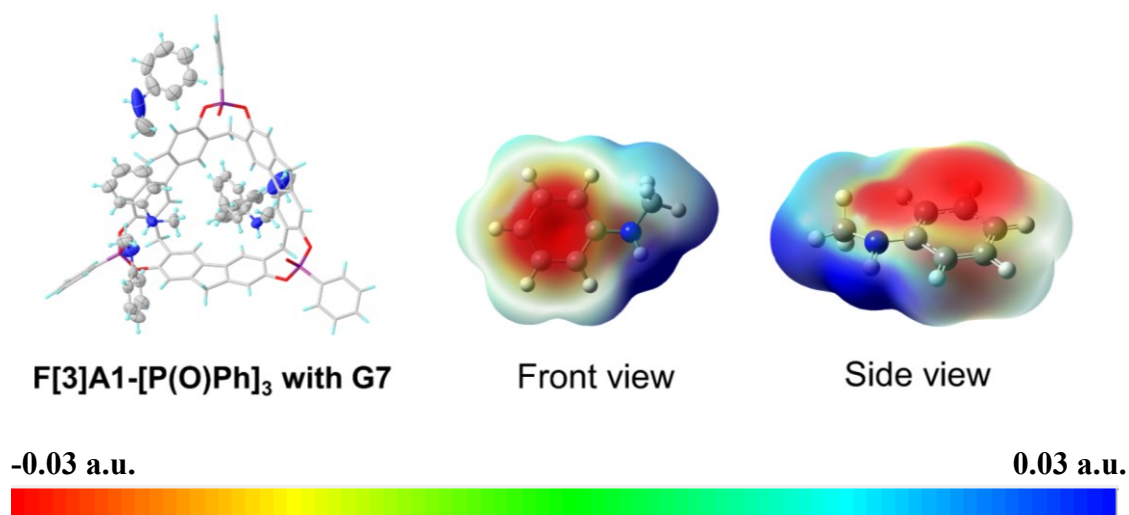

Figure S87. DFT-calculated ESP surfaces of G7

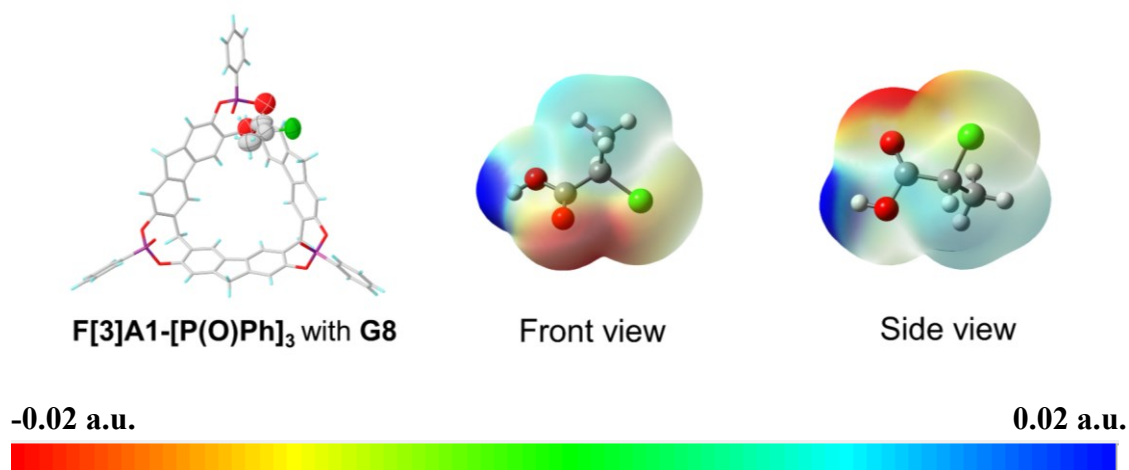

Figure S88. DFT-calculated ESP surfaces of G8

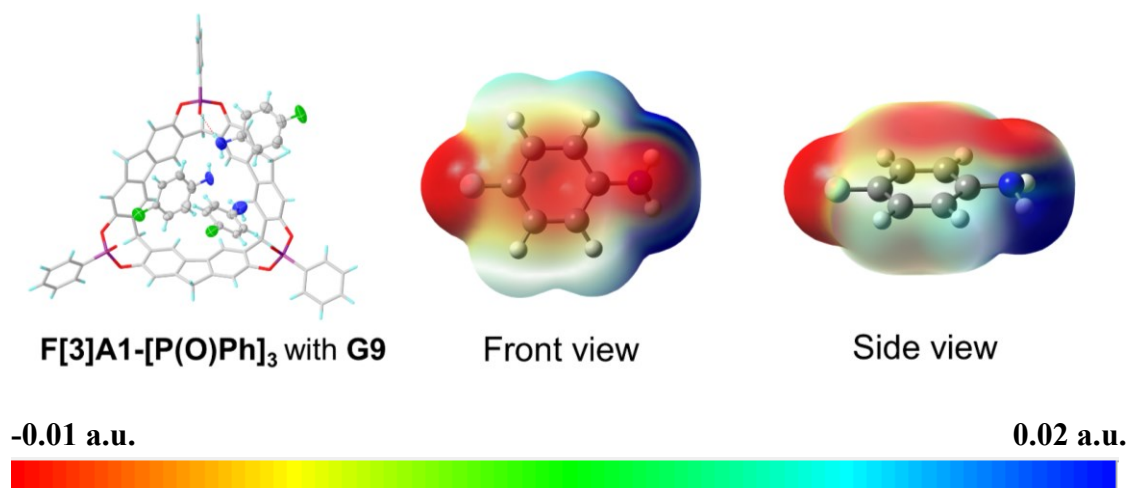

Figure S89. DFT-calculated ESP surfaces of G9

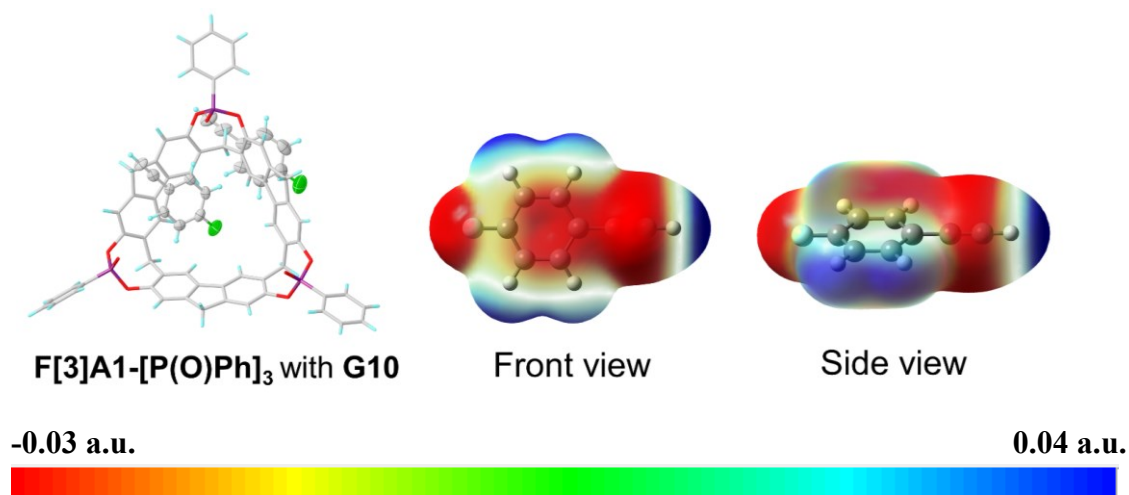

Figure S90. DFT-calculated ESP surfaces of G10

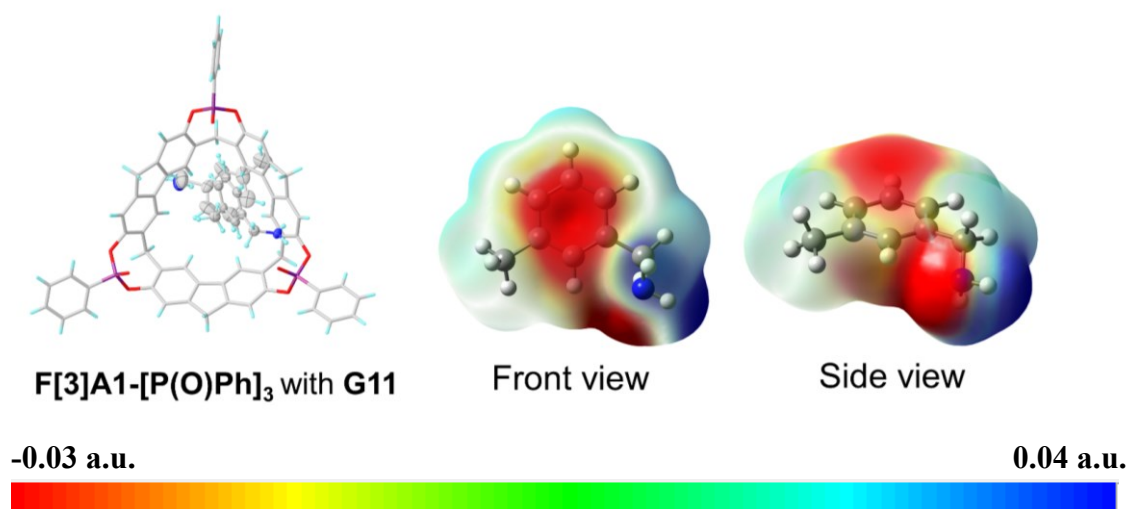

Figure S91. DFT-calculated ESP surfaces of G11

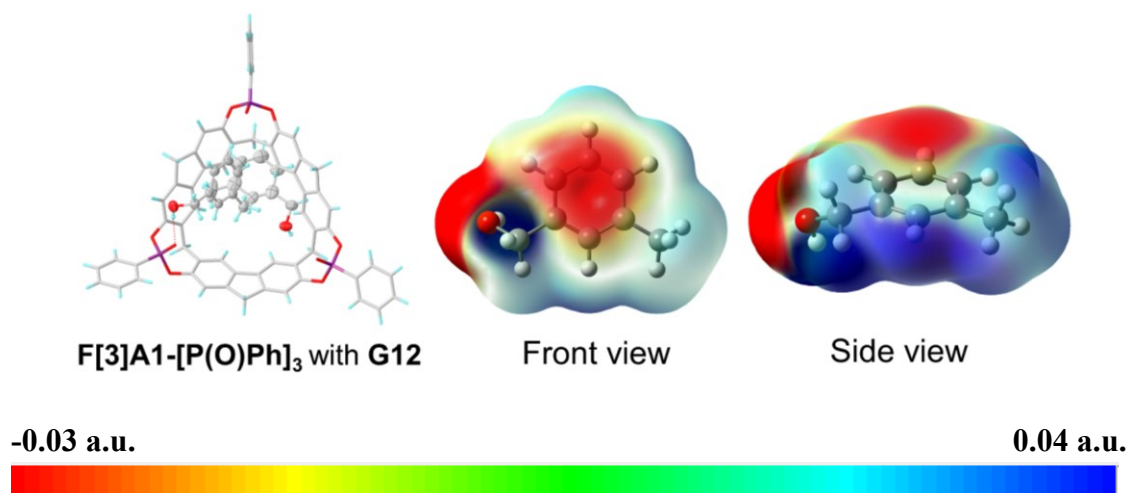

**Figure S92. DFT-calculated ESP surfaces of G12**

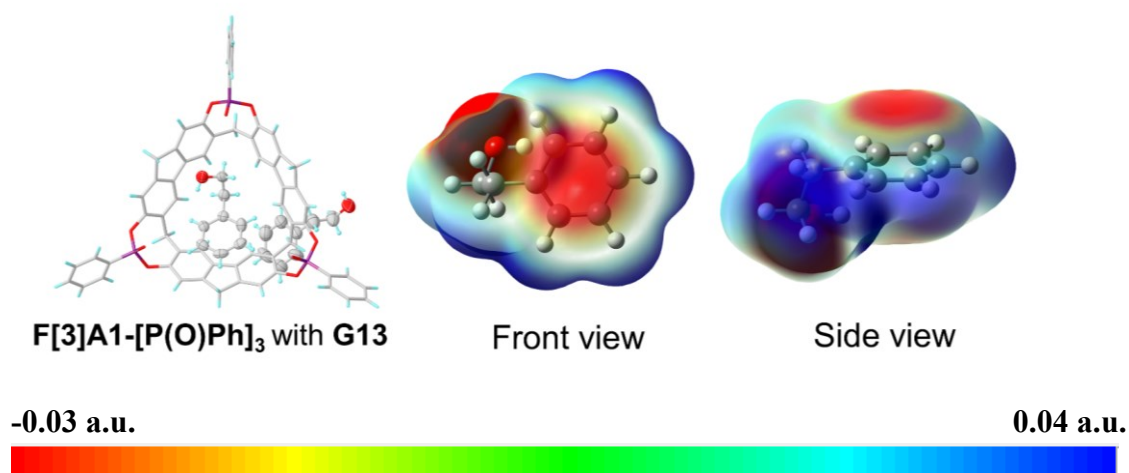

**Figure S93. DFT-calculated ESP surfaces of G13**

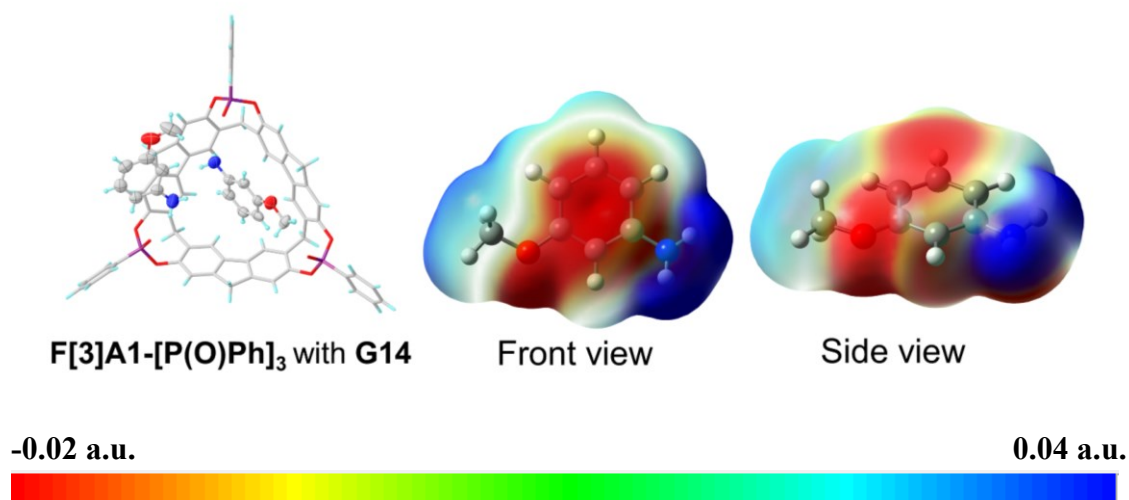

**Figure S94. DFT-calculated ESP surfaces of G14**

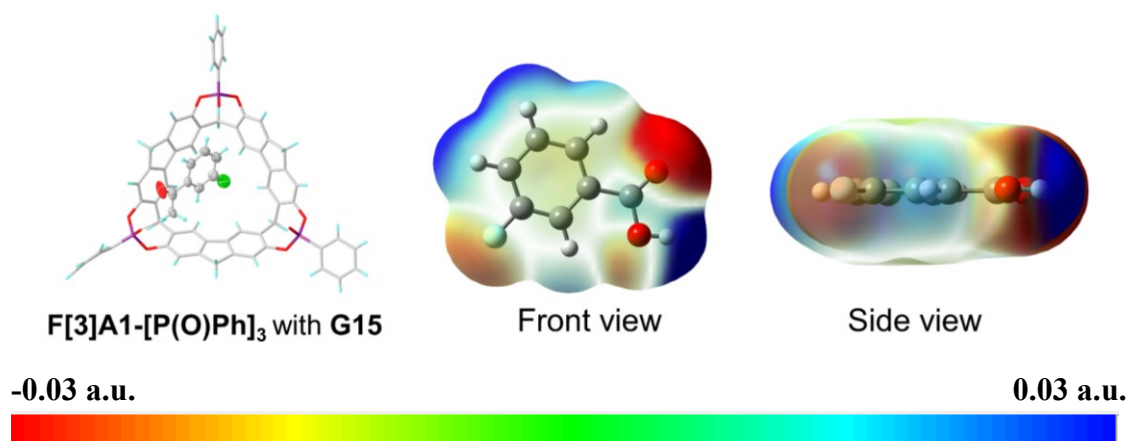

**Figure S95. DFT-calculated ESP surfaces of G15**

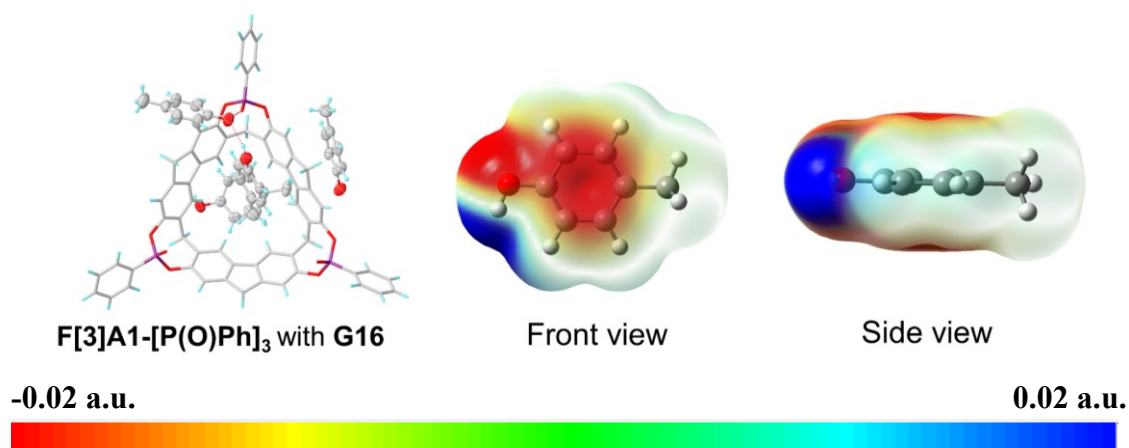

**Figure S96. DFT-calculated ESP surfaces of G16**

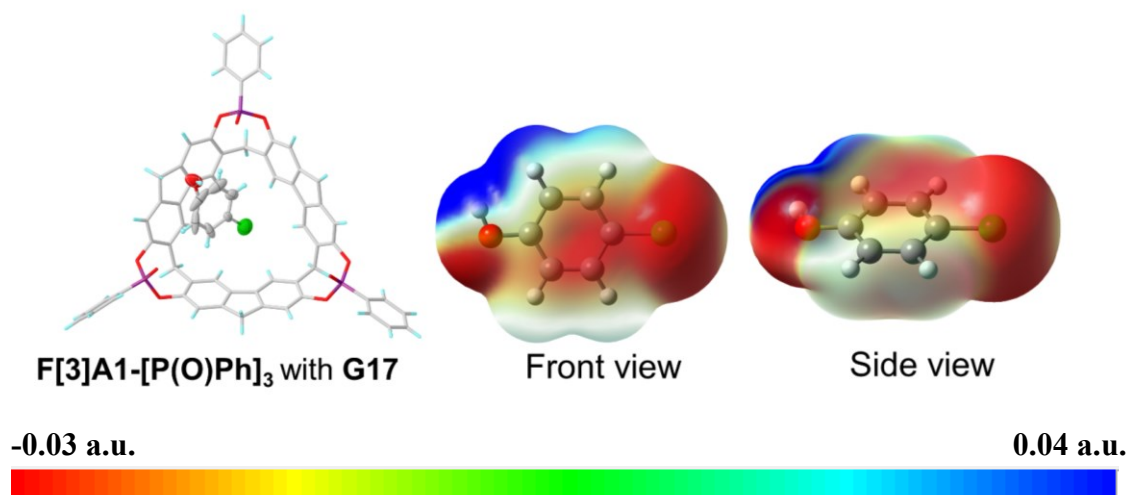

**Figure S97. DFT-calculated ESP surfaces of G17**

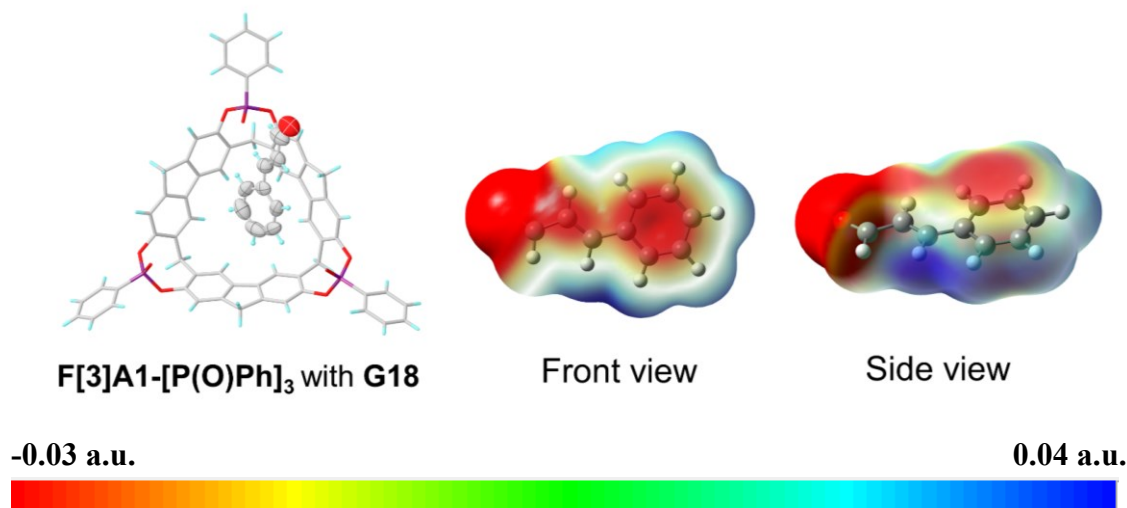

**Figure S98. DFT-calculated ESP surfaces of G18**

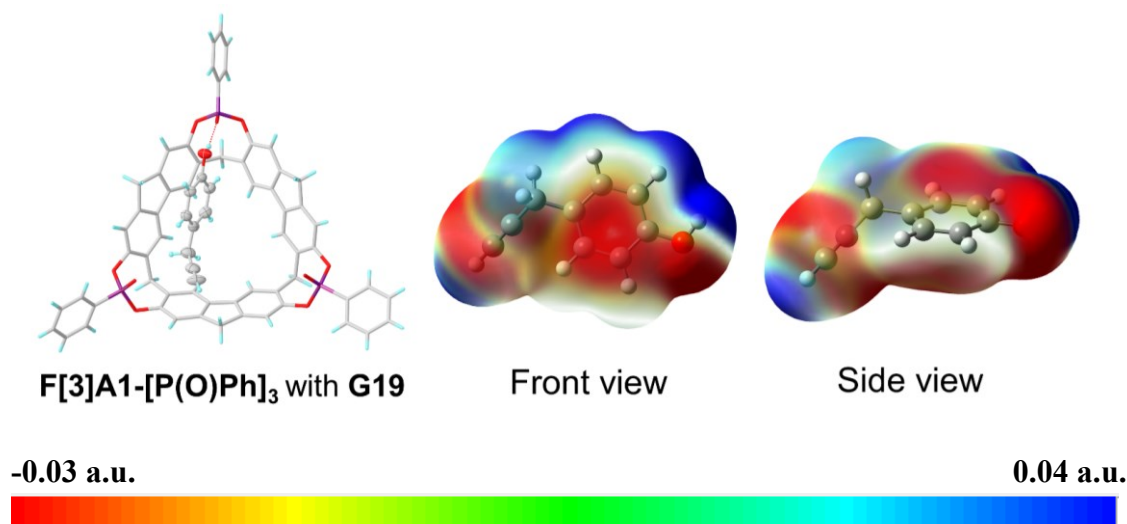

**Figure S99. DFT-calculated ESP surfaces of G19**

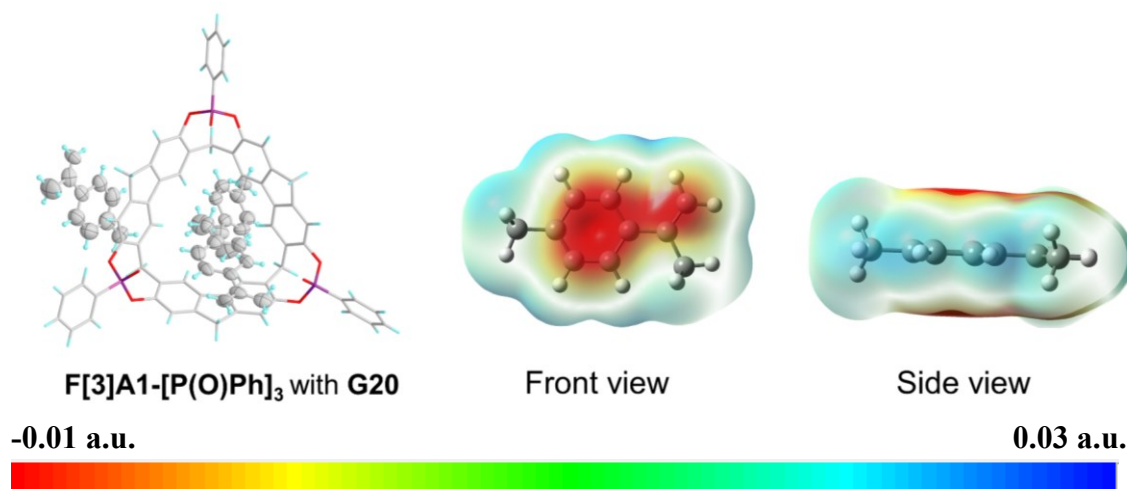

**Figure S100. DFT-calculated ESP surfaces of G20**

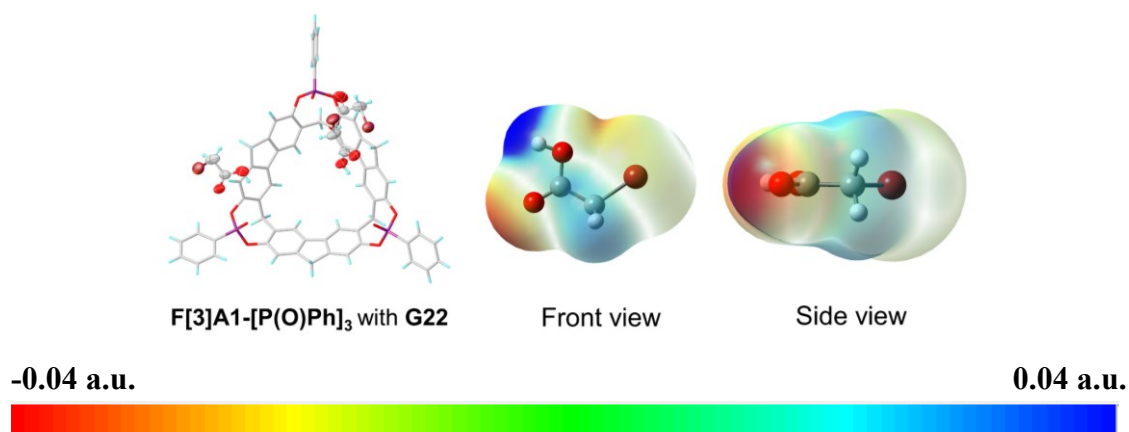

**Figure S101. DFT-calculated ESP surfaces of G22**

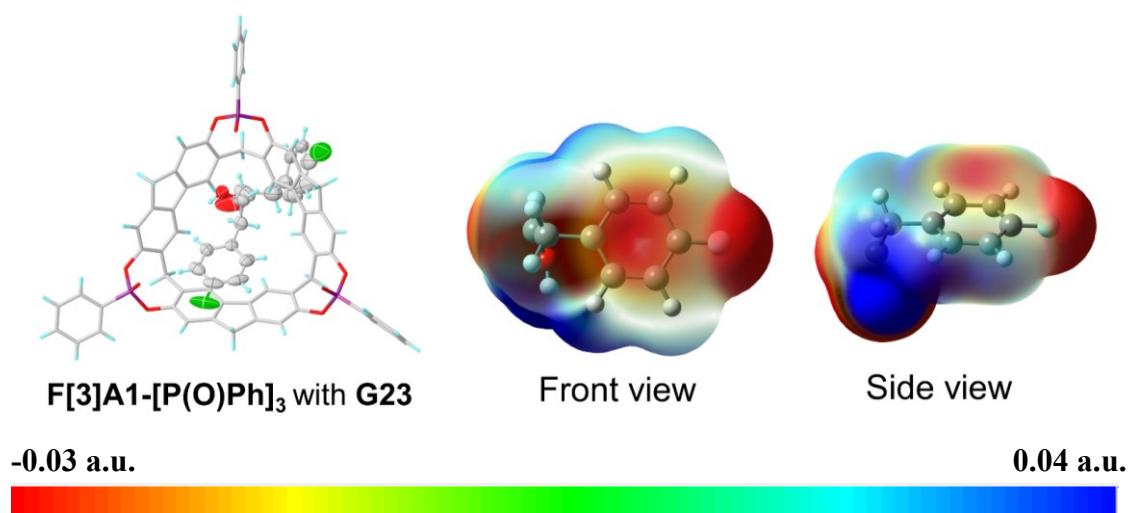

**Figure S102. DFT-calculated ESP surfaces of G23**

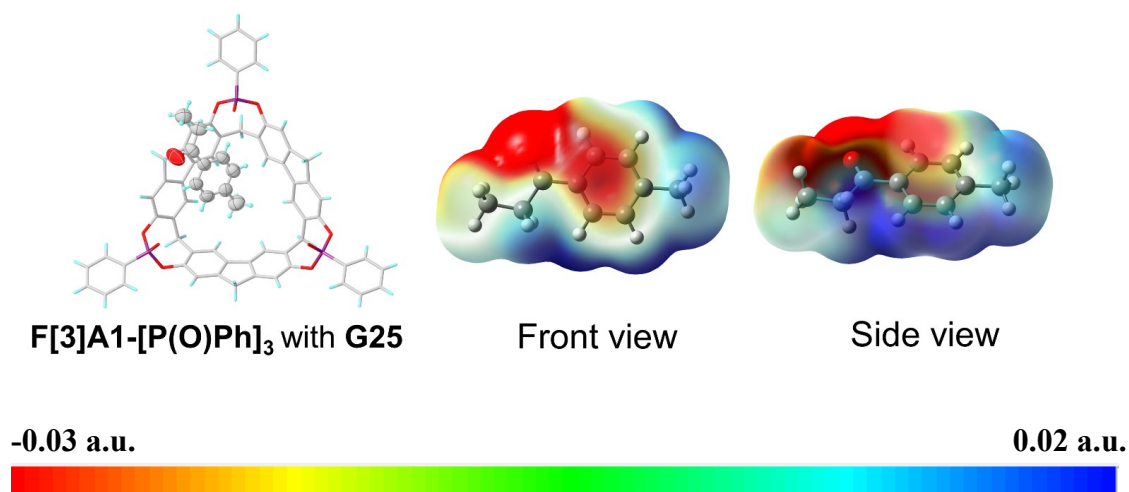

**Figure S103. DFT-calculated ESP surfaces of G25**



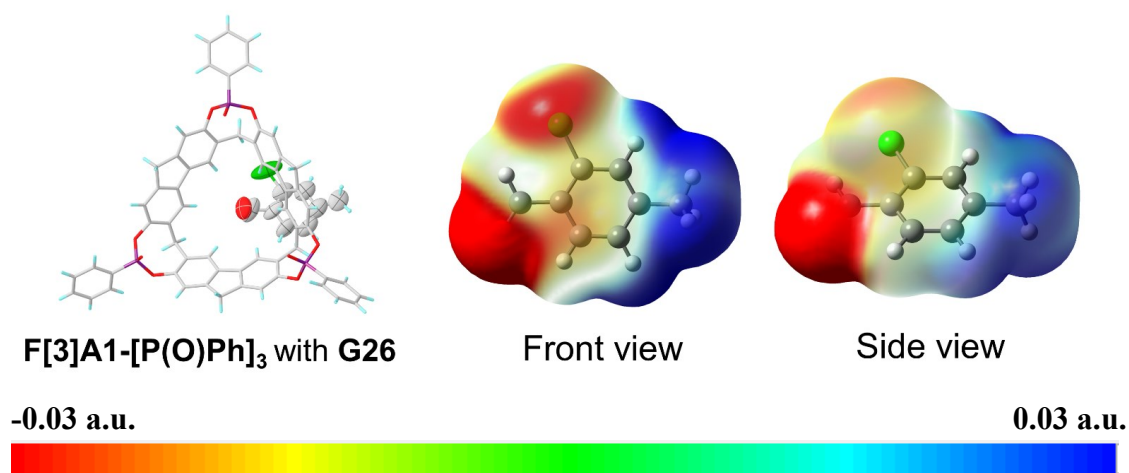

Figure S104. DFT-calculated ESP surfaces of G26

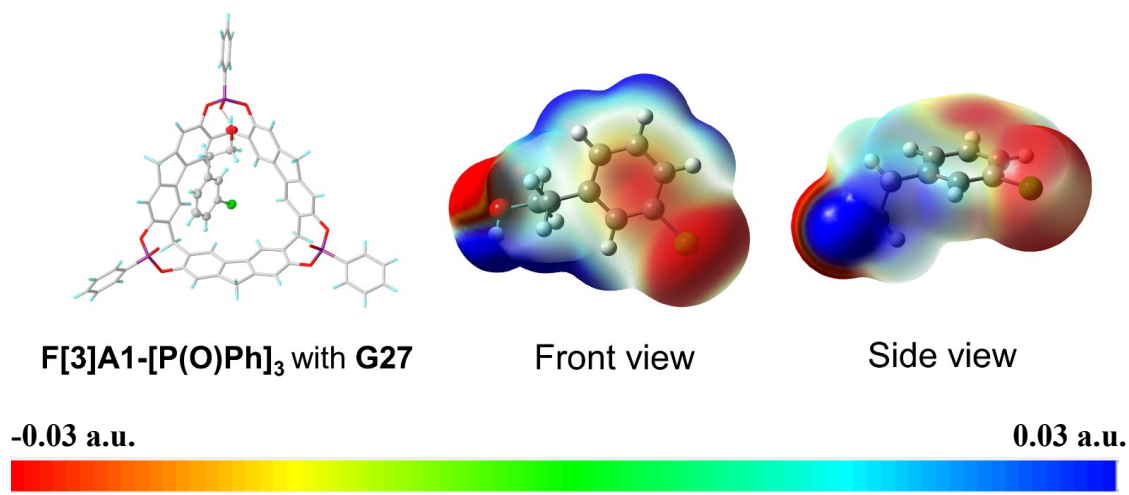

Figure S105. DFT-calculated ESP surfaces of G27

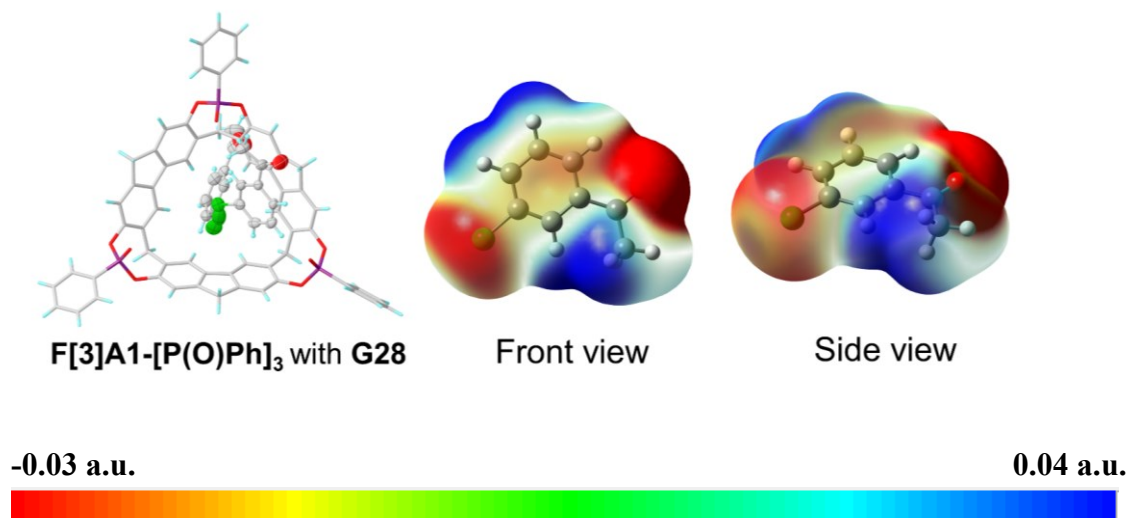

Figure S106. DFT-calculated ESP surfaces of G28

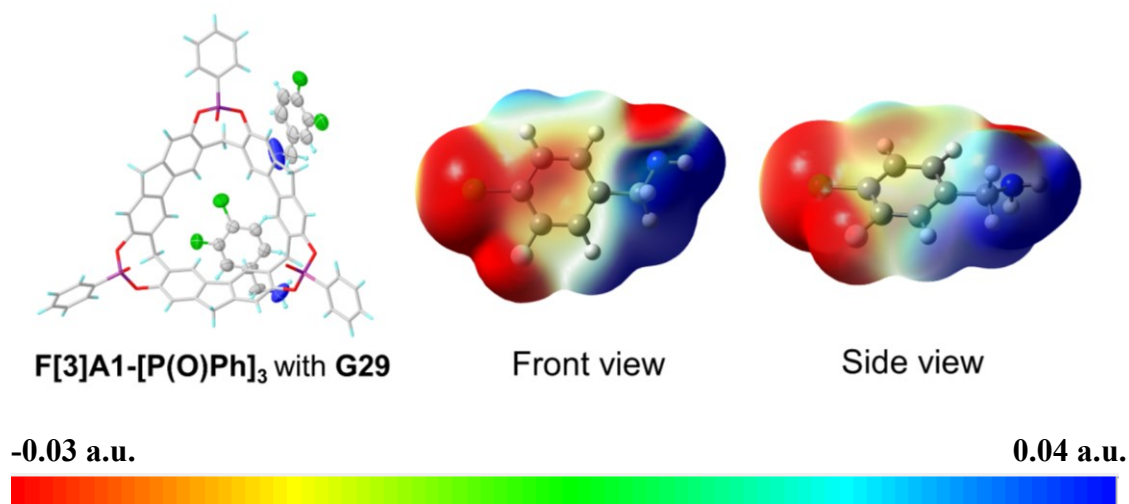

Figure S107. DFT-calculated ESP surfaces of G29

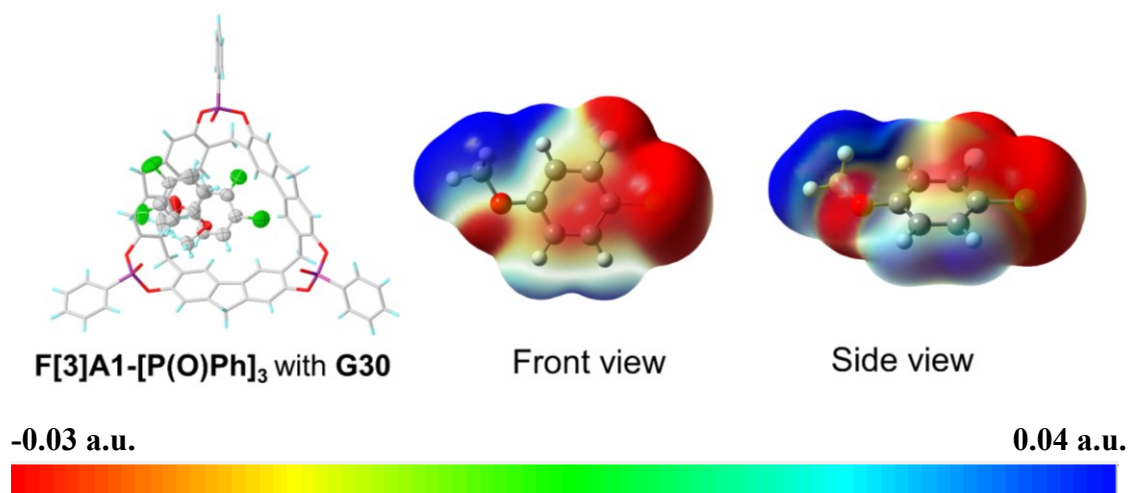

Figure S108. DFT-calculated ESP surfaces of G30

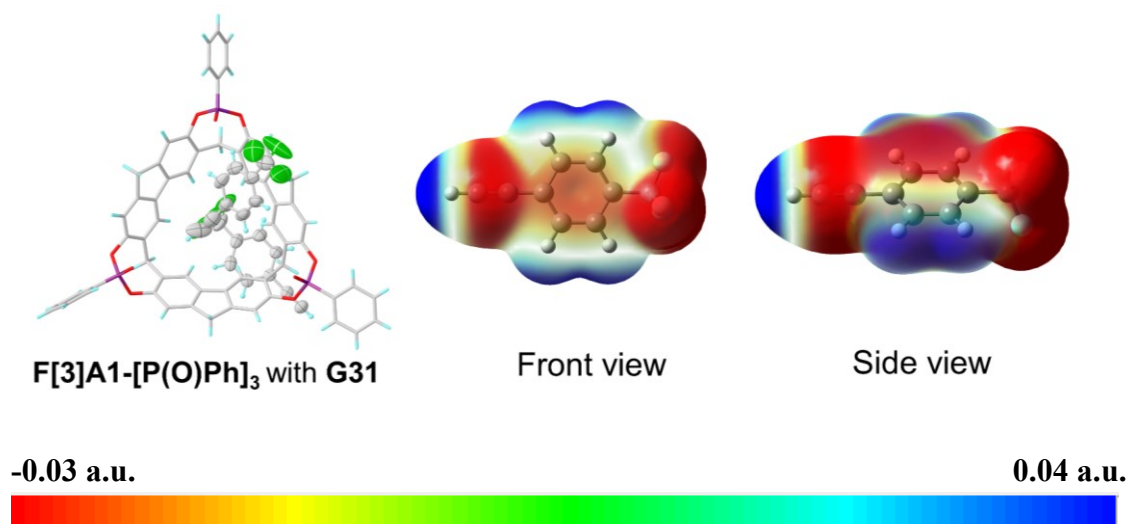

Figure S109. DFT-calculated ESP surfaces of G31

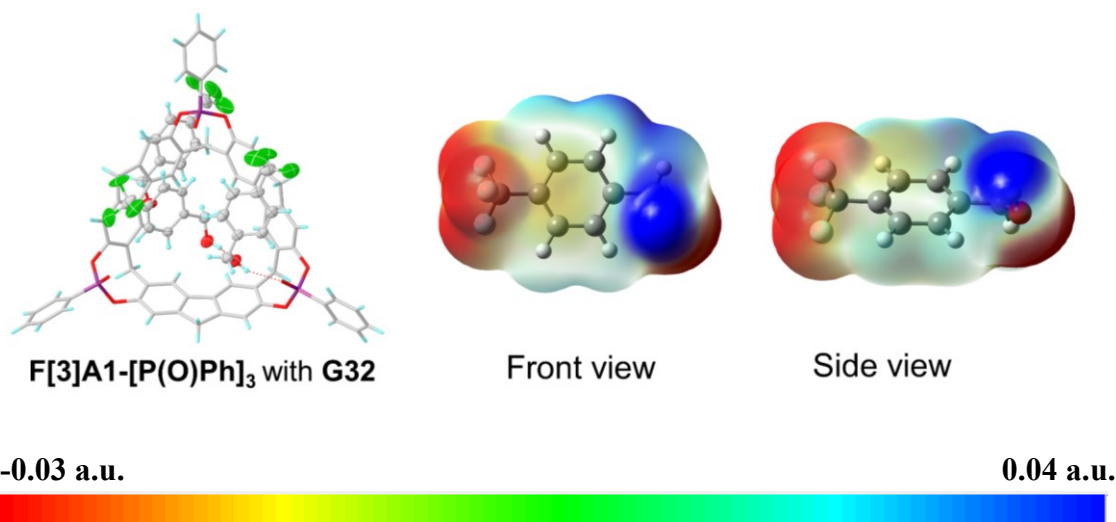

Figure S110. DFT-calculated ESP surfaces of G32

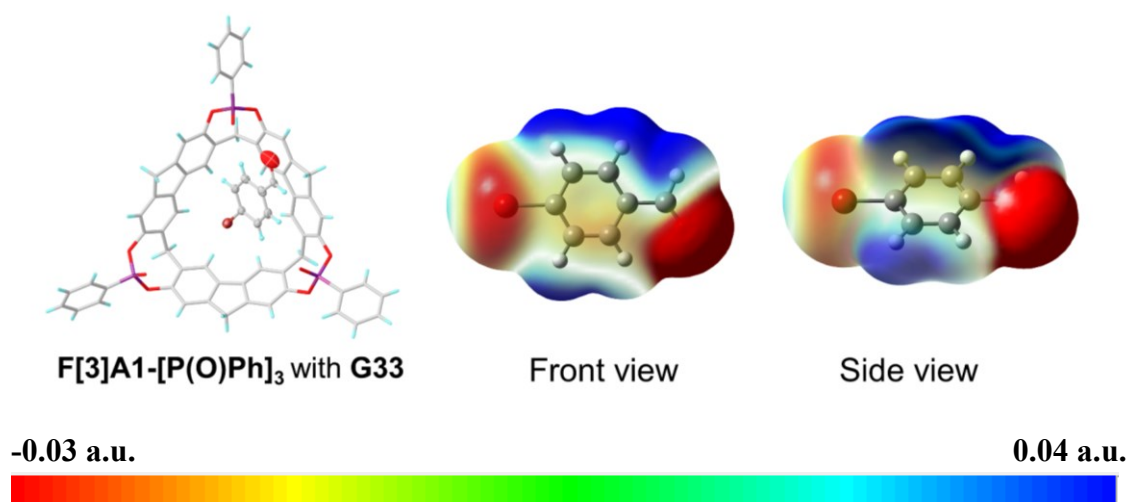

Figure S111. DFT-calculated ESP surfaces of G33

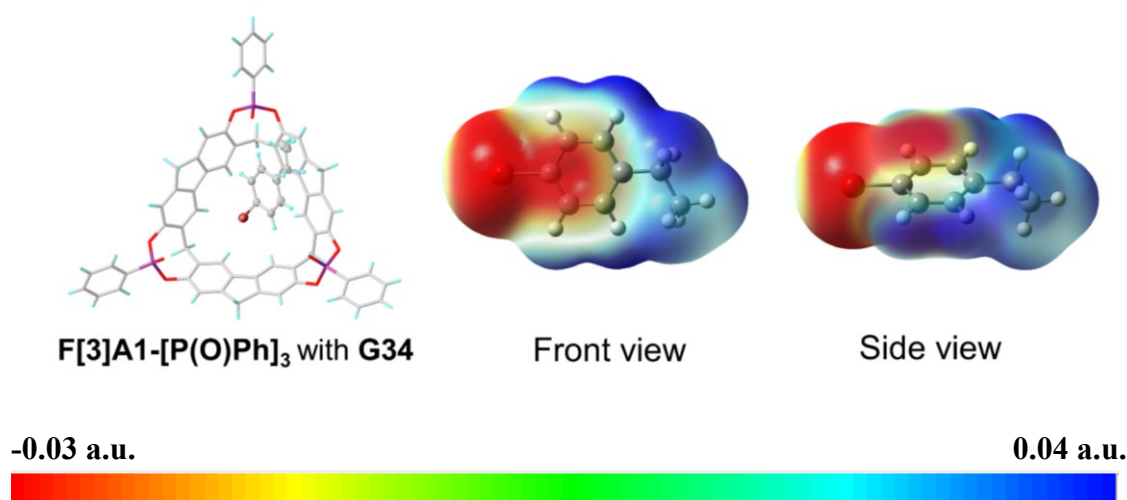

Figure S112. DFT-calculated ESP surfaces of G34

## 8. Structural breadth of the chaperone effect

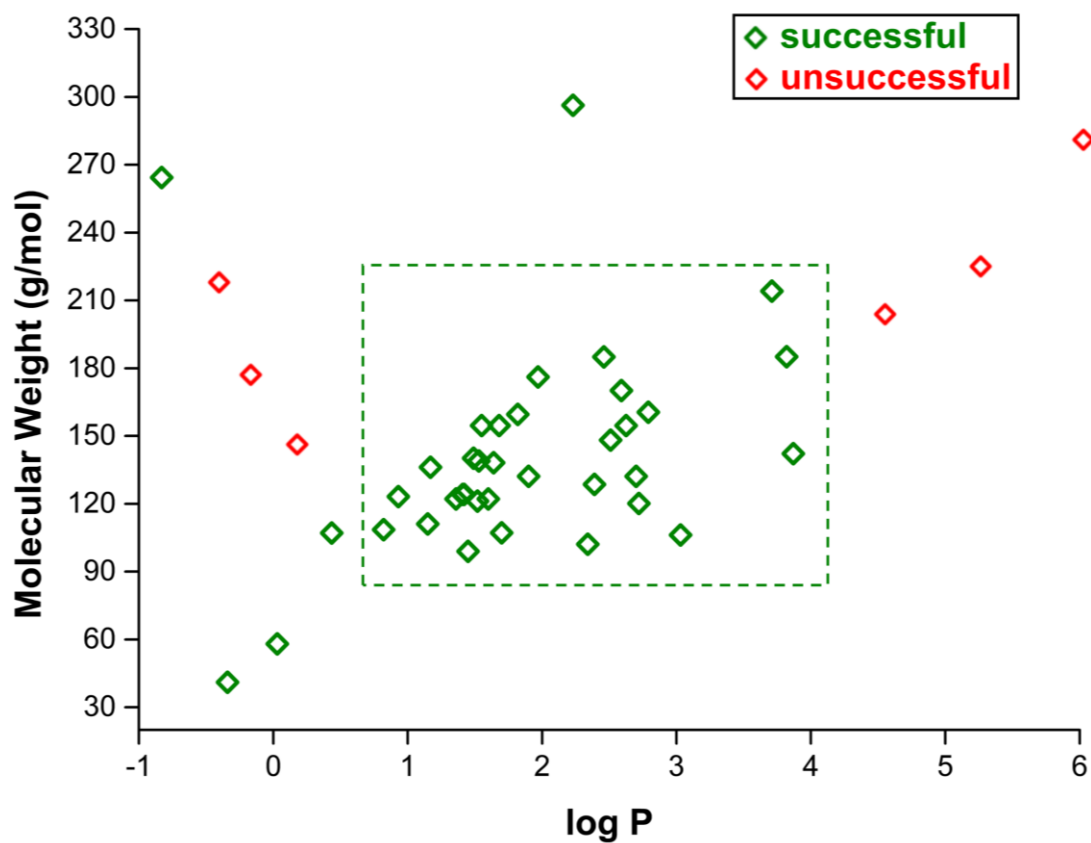

**Figure S113.** Diversity of analytes co-crystallized with  $F[3]A1-[P(O)Ph]_3$  visualized as a plot of calculated lipophilicities ( $\log P$  values) of analytes vs their molecular weight.

## 9. Details of DFT calculations

### Coordinates of the fully optimized structure of F[3]A1-[P(O)Ph]<sub>3</sub>

P -1.56312623 1.63326651 0.00000000  
P 3.59987377 11.53626651 2.81800000  
P -0.11812623 4.56126651 10.69700000  
O 3.95787377 10.55926651 1.61400000  
O -0.31212623 2.29726651 -0.73000000  
O 4.54387377 11.14026651 4.03000000  
O -0.94012623 0.61826651 1.05400000  
O 0.19687377 3.07326651 10.23700000  
O 1.31187377 5.25326651 10.87500000  
O 2.17387377 11.56126651 3.14700000  
O -2.52712623 2.56626651 0.56700000  
O -1.02112623 5.30626651 9.82700000  
C 2.24287377 4.10126651 1.20000000  
H 2.94887377 3.92426651 1.81000000  
C 2.63587377 6.65926651 1.14000000  
C 1.99187377 5.39826651 0.78300000  
C 4.40387377 7.76226651 5.47000000  
H 4.69787377 6.87926651 5.28200000  
C 1.45287377 3.05426651 0.72000000  
C 1.68487377 2.57426651 6.91000000  
H 2.51187377 2.68526651 6.45600000  
C 3.69387377 6.91326651 2.00500000  
H 4.10987377 6.19226651 2.46400000  
C 3.23587377 7.12226651 7.70900000  
C 0.43387377 3.35126651 -0.16500000  
C 3.47987377 9.23926651 1.50300000  
C 4.14687377 8.21026651 2.20400000  
C 3.72287377 8.03326651 6.65400000  
C 1.99887377 7.70426651 0.46700000  
C 1.56687377 2.94326651 8.24800000  
C -2.14012623 0.50526651 -1.24400000  
C 0.94687377 5.67026651 -0.12700000  
C 3.32587377 5.76026651 7.82700000  
H 3.82487377 5.26026651 7.19100000  
C 2.41787377 9.01126651 0.64600000  
H 1.98887377 9.73026651 0.19400000  
C -0.91512623 1.22526651 4.65700000  
C 0.40287377 1.66626651 4.83500000  
C 1.27987377 1.74026651 3.75400000

H 2.18287377 2.00526651 3.88600000  
C 1.69687377 1.65126651 1.25600000  
H 1.48287377 0.98326651 0.55800000  
H 2.65087377 1.54626651 1.50400000  
C 0.58687377 2.04326651 6.23900000  
C 3.56287377 10.37226651 6.08700000  
H 3.30087377 11.26226651 6.29100000  
C 0.33287377 2.74126651 8.87300000  
C 4.65287377 8.79626651 4.55600000  
C 1.85287377 7.25826651 9.68200000  
H 1.35487377 7.75726651 10.32000000  
C -0.49312623 0.99526651 2.33700000  
C 2.67987377 5.09526651 8.89000000  
C 2.71787377 3.58826651 8.97700000  
H 3.56987377 3.26326651 8.59000000  
H 2.69287377 3.31726651 9.92800000  
C 3.29287377 9.33526651 6.94900000  
C -1.36512623 0.86426651 3.40200000  
H -2.24712623 0.53526651 3.27500000  
C 4.23487377 10.07426651 4.90600000  
C 0.81887377 1.42326651 2.47700000  
C 5.24687377 8.49726651 3.19500000  
H 5.77887377 9.27226651 2.88600000  
H 5.84887377 7.71526651 3.25800000  
C 0.16287377 4.64626651 -0.61200000  
H -0.53912623 4.81526651 -1.22900000  
C 1.95787377 5.87926651 9.78100000  
C 2.49087377 7.88626651 8.63300000  
C -0.76212623 2.18026651 8.24000000  
H -1.57612623 2.03326651 8.70800000  
C 0.88487377 7.15726651 -0.41700000  
H 0.00487377 7.53726651 -0.16700000  
H 1.05887377 7.34526651 -1.37400000  
C -1.67212623 1.28726651 5.95700000  
H -1.97312623 0.38526651 6.24200000  
H -2.45812623 1.88326651 5.88800000  
C -0.65912623 4.31126651 12.36700000  
C 4.34687377 13.04326651 2.25300000  
C 2.50087377 9.34126651 8.23200000  
H 1.58287377 9.67826651 8.08200000  
H 2.94287377 9.89926651 8.92100000  
C -0.63912623 1.84526651 6.91100000  
C -1.21512623 -0.26173349 -1.99600000  
H -0.28112623 -0.18073349 -1.83700000

C -3.48912623 0.34526651 -1.46000000  
 H -4.11012623 0.83526651 -0.93500000  
 C -3.94912623 -0.52173349 -2.43700000  
 H -4.88312623 -0.61273349 -2.58700000  
 C -0.02212623 3.43126651 13.20400000  
 H 0.74787377 2.96726651 12.90000000  
 C -3.06012623 -1.24973349 -3.18700000  
 H -3.37812623 -1.83573349 -3.86400000  
 C -1.69012623 -1.13373349 -2.95900000  
 H -1.08112623 -1.65473349 -3.46800000  
 C -1.80612623 4.96726651 12.80400000  
 H -2.25512623 5.57126651 12.22700000  
 C -0.48812623 3.21026651 14.49300000  
 H -0.03112623 2.62126651 15.08100000  
 C -1.64412623 3.87426651 14.90100000  
 H -1.98812623 3.71926651 15.77300000  
 C 4.98487377 13.90826651 3.10400000  
 H 5.04887377 13.70026651 4.02800000  
 C 4.25987377 13.37626651 0.90400000  
 H 3.84387377 12.77726651 0.29600000  
 C -2.28812623 4.74126651 14.06800000  
 H -3.07012623 5.18826651 14.36400000  
 C 4.77687377 14.57726651 0.43800000  
 H 4.66787377 14.82126651 -0.47300000  
 C 5.44087377 15.40126651 1.29300000  
 H 5.83787377 16.20026651 0.96800000  
 C 5.53787377 15.08126651 2.61900000  
 H 5.98687377 15.67126651 3.21400000

**Coordinates of the fully optimized structure of F[3]A1-[P(O)Ph]<sub>3</sub> with (G6) 4-Pyridinecarboxaldehyde**

P -0.56506848 1.90924663 0.00000000  
 P -3.81406848 8.70824663 -7.94600000  
 P -8.51906848 9.71324663 1.92100000  
 O -1.83206848 1.64324663 0.91800000  
 O -3.59806848 7.18824663 -8.38400000  
 O -5.39006848 8.94124663 -7.98100000  
 O -0.88706848 1.21924663 -1.40400000  
 O -3.19806848 9.04224663 -6.66300000  
 O -0.19506848 3.31624663 -0.11200000  
 O -9.47506848 9.72224663 0.64300000  
 O -8.63306848 8.24424663 2.53200000

|   |             |             |             |
|---|-------------|-------------|-------------|
| O | -7.15506848 | 10.13424663 | 1.65100000  |
| C | -2.12906848 | 4.74924663  | -6.09000000 |
| C | -6.16906848 | 5.18424663  | 1.20500000  |
| C | -8.16806848 | 8.57224663  | -3.12600000 |
| C | -3.49906848 | 6.19224663  | -7.38300000 |
| C | -3.27906848 | 4.30024663  | -5.42400000 |
| C | -7.54006848 | 8.45324663  | -4.45400000 |
| C | -4.67706848 | 5.72324663  | -6.78200000 |
| C | -4.54306848 | 4.77124663  | -5.77900000 |
| H | -5.31406848 | 4.44024663  | -5.33500000 |
| C | -1.55806848 | 1.95024663  | -2.41400000 |
| C | -3.59806848 | 2.76924663  | -3.35000000 |
| H | -4.54406848 | 2.85224663  | -3.33800000 |
| C | -7.19406848 | 7.33424663  | -5.19100000 |
| H | -7.44906848 | 6.46924663  | -4.89000000 |
| C | -5.12506848 | 4.18324663  | 0.95400000  |
| C | -2.94706848 | 2.53124663  | 0.90900000  |
| C | -0.80406848 | 2.53824663  | -3.40800000 |
| H | 0.14093152  | 2.44524663  | -3.42300000 |
| C | -6.12906848 | 8.75824663  | -6.77800000 |
| C | -2.95006848 | 2.01824663  | -2.36300000 |
| C | -4.99806848 | 3.24524663  | -0.06800000 |
| H | -5.65906848 | 3.18924663  | -0.74700000 |
| C | -2.85906848 | 3.39224663  | -4.34900000 |
| C | -8.20506848 | 9.93424663  | -2.78400000 |
| C | -6.47106848 | 7.47624663  | -6.37600000 |
| C | -2.23506848 | 5.72424663  | -7.07800000 |
| H | -1.46706848 | 6.05624663  | -7.52600000 |
| C | -4.16506848 | 4.26624663  | 1.96600000  |
| C | -7.31606848 | 5.48724663  | 0.47900000  |
| H | -7.53406848 | 4.98924663  | -0.30000000 |
| C | -7.19806848 | 9.74224663  | -4.90000000 |
| C | 0.62393152  | 0.78724663  | 0.70100000  |
| C | -1.46206848 | 3.26824663  | -4.38100000 |
| C | -7.63806848 | 10.77624663 | -3.88800000 |
| H | -6.87006848 | 11.31524663 | -3.57000000 |
| H | -8.32406848 | 11.38024663 | -4.26700000 |
| C | -3.90306848 | 2.39324663  | -0.09400000 |
| C | -9.01006848 | 7.96424663  | -0.95000000 |
| C | -9.02006848 | 9.32624663  | -0.64300000 |
| C | -8.14606848 | 6.53024663  | 0.90300000  |
| C | -8.65006848 | 10.31024663 | -1.53000000 |
| H | -8.69806848 | 11.22624663 | -1.28700000 |
| C | -3.73606848 | 1.40524663  | -1.22600000 |



|   |              |             |              |
|---|--------------|-------------|--------------|
| H | -4.62806848  | 1.12524663  | -1.55500000  |
| H | -3.26506848  | 0.59924663  | -0.89500000  |
| C | -3.06306848  | 3.43324663  | 1.95200000   |
| H | -2.40506848  | 3.47824663  | 2.63600000   |
| C | -8.58306848  | 7.59924663  | -2.22700000  |
| H | -8.57606848  | 6.68324663  | -2.48100000  |
| C | -6.04006848  | 6.25724663  | -7.17900000  |
| H | -6.71206848  | 5.54024663  | -7.05800000  |
| H | -6.02306848  | 6.49624663  | -8.14000000  |
| C | -5.84806848  | 5.87724663  | 2.37000000   |
| C | -4.58106848  | 5.31724663  | 2.97900000   |
| H | -4.75606848  | 4.91124663  | 3.86500000   |
| H | -3.88706848  | 6.01824663  | 3.07300000   |
| C | -3.25906848  | 9.59124663  | -9.38000000  |
| C | -0.89606848  | 4.09024663  | -5.53200000  |
| H | -0.24506848  | 4.76224663  | -5.20900000  |
| H | -0.46006848  | 3.51224663  | -6.20800000  |
| C | -6.48406848  | 9.90024663  | -6.07700000  |
| H | -6.24606848  | 10.76424663 | -6.39400000  |
| C | -7.77706848  | 7.21624663  | 2.05200000   |
| C | -9.36206848  | 6.91824663  | 0.07600000   |
| H | -9.71706848  | 6.11424663  | -0.38100000  |
| H | -10.06906848 | 7.26724663  | 0.67300000   |
| C | -1.87906848  | 9.68024663  | -9.58000000  |
| H | -1.28206848  | 9.22824663  | -8.99400000  |
| C | -6.65606848  | 6.91324663  | 2.80600000   |
| H | -6.44806848  | 7.40124663  | 3.59500000   |
| C | -1.38306848  | 10.42724663 | -10.62800000 |
| H | -0.44406848  | 10.48924663 | -10.75700000 |
| C | -2.23506848  | 11.08424663 | -11.49400000 |
| H | -1.88406848  | 11.60324663 | -12.20800000 |
| C | 0.98893152   | 0.97024663  | 2.03100000   |
| H | 0.57193152   | 1.64724663  | 2.55000000   |
| C | 1.24293152   | -0.20875337 | -0.05200000  |
| H | 0.99793152   | -0.34175337 | -0.95900000  |
| C | -4.12006848  | 10.25024663 | -10.26200000 |
| H | -5.06106848  | 10.19424663 | -10.14300000 |
| C | 2.21893152   | -1.00375337 | 0.53000000   |
| H | 2.64793152   | -1.67775337 | 0.01500000   |
| C | -3.59306848  | 10.98224663 | -11.31500000 |
| H | -4.18006848  | 11.42224663 | -11.91800000 |
| C | 2.56793152   | -0.81875337 | 1.84800000   |
| H | 3.23393152   | -1.37075337 | 2.24100000   |
| C | 1.96393152   | 0.15724663  | 2.60000000   |

|   |              |             |             |
|---|--------------|-------------|-------------|
| H | 2.20993152   | 0.27824663  | 3.50900000  |
| C | -9.52306848  | 11.68924663 | 5.22400000  |
| H | -9.22906848  | 11.68924663 | 6.12600000  |
| C | -8.94506848  | 10.82124663 | 4.30500000  |
| H | -8.25606848  | 10.22924663 | 4.57700000  |
| C | -9.37806848  | 10.82124663 | 2.98300000  |
| C | -10.38906848 | 11.68824663 | 2.58300000  |
| H | -10.68406848 | 11.68724663 | 1.67900000  |
| C | -10.96706848 | 12.55424663 | 3.50200000  |
| H | -11.65906848 | 13.14524663 | 3.22800000  |
| C | -10.53506848 | 12.55524663 | 4.82400000  |
| H | -10.93006848 | 13.14624663 | 5.45200000  |
| O | -5.18306848  | 6.11124663  | -2.74800000 |
| C | -4.37006848  | 8.86924663  | -3.27600000 |
| H | -4.16206848  | 8.30124663  | -4.01100000 |
| C | -4.93106848  | 8.35324663  | -2.13100000 |
| C | -5.27806848  | 6.90524663  | -1.92200000 |
| H | -5.58906848  | 6.63324663  | -1.06600000 |
| C | -5.20106848  | 9.19324663  | -1.13400000 |
| H | -5.60206848  | 8.83924663  | -0.34900000 |
| C | -4.11906848  | 10.22124663 | -3.33800000 |
| H | -3.74306848  | 10.62624663 | -4.11100000 |
| N | -4.43306848  | 10.92924663 | -2.26000000 |
| C | -4.93306848  | 10.54324663 | -1.17500000 |
| H | -5.11106848  | 11.12924663 | -0.44900000 |
| N | -5.51606848  | 18.47324663 | -3.10900000 |
| C | -4.38406848  | 17.84524663 | -3.11800000 |
| H | -3.58606848  | 18.36124663 | -3.14200000 |
| C | -4.27006848  | 16.50624663 | -3.09200000 |
| H | -3.40906848  | 16.10924663 | -3.03800000 |
| O | -4.33306848  | 13.83824663 | -2.40900000 |
| C | -5.39006848  | 15.69824663 | -3.14400000 |
| C | -6.62306848  | 17.73724663 | -3.20900000 |
| H | -7.45506848  | 18.18624663 | -3.30700000 |
| C | -6.62006848  | 16.35024663 | -3.17600000 |
| H | -7.43306848  | 15.85924663 | -3.17600000 |
| C | -5.39406848  | 14.18324663 | -3.18100000 |
| H | -5.99706848  | 13.60824663 | -3.64000000 |

**Coordinates of the fully optimized structure of F[3]A1-[P(O)Ph]<sub>3</sub> with (G21) 4-Fluoroacetophenone**

|   |             |            |            |
|---|-------------|------------|------------|
| P | -2.46575339 | 1.36130141 | 0.00000000 |
|---|-------------|------------|------------|

|   |             |             |             |
|---|-------------|-------------|-------------|
| P | -7.81075339 | 2.04230141  | 9.61800000  |
| P | 0.09624661  | -5.97469859 | 7.69900000  |
| O | -2.28375339 | -0.15269859 | -0.47800000 |
| O | -0.19975339 | -6.60269859 | 6.25700000  |
| O | -4.02875339 | 1.62530141  | -0.05500000 |
| O | -7.90675339 | 0.53130141  | 10.11400000 |
| O | -1.25375339 | -6.16969859 | 8.52900000  |
| O | -8.68075339 | 2.09730141  | 8.28700000  |
| O | -1.85275339 | 1.64630141  | 1.29500000  |
| O | 0.59824661  | -4.60569859 | 7.66000000  |
| O | -6.45475339 | 2.55330141  | 9.46700000  |
| C | -6.05575339 | -0.06069859 | 2.51100000  |
| H | -6.35775339 | -0.91069859 | 2.73800000  |
| C | -5.99175339 | 2.32430141  | 2.94000000  |
| C | -6.40675339 | 1.03230141  | 3.28900000  |
| C | -1.04675339 | -2.76369859 | 1.73900000  |
| C | -5.25275339 | 0.11530141  | 1.38700000  |
| C | -1.92475339 | -4.19969859 | 3.34900000  |
| C | -4.83475339 | 1.41130141  | 1.08500000  |
| C | -3.50175339 | -1.65369859 | 0.97700000  |
| C | -3.45675339 | -2.67269859 | 1.93300000  |
| H | -4.24475339 | -2.99069859 | 2.31000000  |
| C | -0.79875339 | -5.79569859 | 5.26100000  |
| C | -7.15075339 | 2.44330141  | 4.98400000  |
| C | -2.24675339 | -3.20469859 | 2.31900000  |
| C | -5.46875339 | -2.51569859 | 8.73300000  |
| C | -7.12875339 | 1.10330141  | 4.57100000  |
| C | -2.73775339 | -4.85769859 | 4.26500000  |
| H | -3.66075339 | -4.75269859 | 4.22200000  |
| C | -6.59775339 | -2.18269859 | 8.01100000  |
| H | -6.81175339 | -2.65769859 | 7.24100000  |
| C | -7.67775339 | 2.77030141  | 6.22200000  |
| H | -7.71575339 | 3.65530141  | 6.50600000  |
| C | -4.44575339 | -3.53969859 | 8.49200000  |
| C | -0.53875339 | -4.37169859 | 3.37300000  |
| C | -8.15375339 | 0.40330141  | 6.63900000  |
| C | -5.20175339 | 2.52330141  | 1.82400000  |
| H | -4.92675339 | 3.37630141  | 1.57700000  |
| C | -3.24575339 | -5.35069859 | 7.45800000  |
| C | -3.05275339 | -6.30969859 | 6.30400000  |
| H | -2.63575339 | -7.12569859 | 6.62300000  |
| H | -3.91375339 | -6.53869859 | 5.92200000  |
| C | -4.32175339 | -4.47669859 | 7.47500000  |
| H | -4.96275339 | -4.51769859 | 6.80200000  |

|   |              |             |             |
|---|--------------|-------------|-------------|
| C | -7.64175339  | 0.10030141  | 5.37600000  |
| H | -7.64475339  | -0.77869859 | 5.07400000  |
| C | -2.17875339  | -5.67369859 | 5.24400000  |
| C | -2.31375339  | -5.25069859 | 8.49000000  |
| C | 0.11124661   | -3.52969859 | 2.30500000  |
| H | 0.77524661   | -2.93369859 | 2.68300000  |
| H | 0.52924661   | -4.08369859 | 1.62800000  |
| C | -6.47675339  | 3.32630141  | 3.96100000  |
| H | -5.73775339  | 3.81730141  | 4.35200000  |
| H | -7.10375339  | 3.95430141  | 3.57000000  |
| C | -8.14475339  | 1.74630141  | 7.02500000  |
| C | -7.41275339  | -1.14169859 | 8.43200000  |
| C | -3.86375339  | -2.37169859 | 10.48700000 |
| H | -4.01675339  | -2.72969859 | 11.37600000 |
| H | -3.17175339  | -1.69369859 | 10.53100000 |
| C | -2.28175339  | -1.19769859 | 0.47200000  |
| C | -1.06175339  | -1.73769859 | 0.81300000  |
| H | -0.27375339  | -1.42269859 | 0.43300000  |
| C | -8.85475339  | 2.89130141  | 10.76300000 |
| C | -7.05075339  | -0.47769859 | 9.61000000  |
| C | 0.03224661   | -5.18269859 | 4.33800000  |
| H | 0.95324661   | -5.31269859 | 4.36700000  |
| C | -4.82275339  | -1.07069859 | 0.54600000  |
| H | -5.50375339  | -1.75869859 | 0.60000000  |
| H | -4.75775339  | -0.79269859 | -0.38100000 |
| C | -3.49575339  | -3.46469859 | 9.51400000  |
| C | -1.87175339  | 2.25930141  | -1.41400000 |
| C | -5.13075339  | -1.81669859 | 9.90000000  |
| C | -2.42175339  | -4.33469859 | 9.52300000  |
| H | -1.78975339  | -4.30669859 | 10.20500000 |
| C | 1.15224661   | -7.20469859 | 8.41800000  |
| C | -8.58475339  | -0.70169859 | 7.58900000  |
| H | -9.29675339  | -0.37969859 | 8.16300000  |
| H | -8.92275339  | -1.45569859 | 7.08200000  |
| C | -5.93875339  | -0.78669859 | 10.35100000 |
| H | -5.73475339  | -0.31969859 | 11.12900000 |
| C | -0.51075339  | 2.25730141  | -1.65900000 |
| H | 0.05724661   | 1.75530141  | -1.12100000 |
| C | 2.10824661   | -6.78369859 | 9.31600000  |
| H | 2.17124661   | -5.88269859 | 9.54100000  |
| C | -2.71375339  | 3.00730141  | -2.22200000 |
| H | -3.63075339  | 3.01630141  | -2.06300000 |
| C | -10.23275339 | 2.76730141  | 10.72000000 |
| H | -10.63275339 | 2.20630141  | 10.09700000 |

|   |              |              |             |
|---|--------------|--------------|-------------|
| C | 0.00624661   | 3.00430141   | -2.70800000 |
| H | 0.92224661   | 3.00630141   | -2.86900000 |
| C | -0.83175339  | 3.73930141   | -3.50700000 |
| H | -0.48375339  | 4.23630141   | -4.21200000 |
| C | -8.27975339  | 3.71130141   | 11.72300000 |
| H | -7.35475339  | 3.78930141   | 11.77400000 |
| C | 2.97424661   | -7.69969859  | 9.88400000  |
| H | 3.62224661   | -7.41469859  | 10.48700000 |
| C | -11.00875339 | 3.48230141   | 11.60900000 |
| H | -11.93475339 | 3.40130141   | 11.57300000 |
| C | 2.87724661   | -9.02069859  | 9.56100000  |
| H | 3.46424661   | -9.63369859  | 9.94100000  |
| C | 1.05124661   | -8.54969859  | 8.10500000  |
| H | 0.40024661   | -8.84569859  | 7.50900000  |
| C | -2.18175339  | 3.74130141   | -3.26700000 |
| H | -2.74575339  | 4.23930141   | -3.81300000 |
| C | -10.44375339 | 4.30430141   | 12.53700000 |
| H | -10.98075339 | 4.78730141   | 13.12200000 |
| C | 1.92424661   | -9.44769859  | 8.68400000  |
| H | 1.86124661   | -10.35269859 | 8.47600000  |
| C | -9.08275339  | 4.41430141   | 12.60100000 |
| H | -8.69275339  | 4.96630141   | 13.24200000 |
| F | -10.54175339 | -9.16069859  | 5.41300000  |
| C | -8.03575339  | -6.76469859  | 4.44400000  |
| H | -7.15275339  | -6.75169859  | 4.15300000  |
| C | -8.73175339  | -5.58269859  | 4.59100000  |
| C | -8.65375339  | -7.97569859  | 4.73100000  |
| H | -8.18475339  | -8.77369859  | 4.65000000  |
| C | -10.04275339 | -5.63369859  | 5.01600000  |
| H | -10.51875339 | -4.84269859  | 5.12500000  |
| C | -10.66175339 | -6.84469859  | 5.28100000  |
| H | -11.54975339 | -6.87369859  | 5.55600000  |
| C | -9.95475339  | -7.97669859  | 5.13400000  |
| O | -8.63875339  | -3.24969859  | 4.71700000  |
| C | -8.07375339  | -4.25669859  | 4.37400000  |
| C | -6.71675339  | -4.17169859  | 3.81500000  |
| H | -6.27175339  | -3.40069859  | 4.17000000  |
| H | -6.76975339  | -4.10069859  | 2.85800000  |
| H | -6.22375339  | -4.96269859  | 4.04800000  |
| F | -3.70175339  | -1.36769859  | 5.16700000  |
| C | -4.23475339  | 1.69130141   | 6.96300000  |
| H | -4.61675339  | 1.98030141   | 7.76100000  |
| O | -3.10775339  | 4.86030141   | 5.66300000  |
| C | -3.68975339  | 2.62230141   | 6.09600000  |

|   |             |             |            |
|---|-------------|-------------|------------|
| C | -4.22375339 | 0.35130141  | 6.66900000 |
| H | -4.57775339 | -0.26969859 | 7.26400000 |
| C | -3.12775339 | 0.84430141  | 4.57700000 |
| H | -2.76575339 | 0.54930141  | 3.77200000 |
| C | -3.72475339 | 4.09930141  | 6.38600000 |
| C | -4.51575339 | 4.62130141  | 7.51600000 |
| H | -4.65775339 | 5.56330141  | 7.39700000 |
| H | -4.04075339 | 4.47030141  | 8.33600000 |
| H | -5.36275339 | 4.17130141  | 7.54900000 |
| C | -3.13175339 | 2.17330141  | 4.90700000 |
| H | -2.75375339 | 2.78730141  | 4.32100000 |
| C | -3.67975339 | -0.04669859 | 5.47900000 |

**Coordinates of the fully optimized structure of F[3]A1-[P(O)Ph]<sub>3</sub> with (G24) 1-Methylnaphthalene**

|   |             |             |              |
|---|-------------|-------------|--------------|
| P | -1.02739724 | 0.77910961  | 0.00000000   |
| P | 4.09260276  | -8.95889039 | -3.04500000  |
| P | 2.97960276  | -0.59889039 | -10.41800000 |
| O | -1.87239724 | 1.18210961  | -1.29300000  |
| O | -1.52039724 | -0.66489039 | 0.42900000   |
| O | 3.57160276  | -9.28389039 | -4.50900000  |
| O | 2.80460276  | -8.86089039 | -2.12000000  |
| O | 1.53660276  | 0.04510961  | -10.18300000 |
| O | 2.70360276  | -2.11289039 | -10.84100000 |
| O | 0.42060276  | 0.87110961  | -0.20800000  |
| O | 3.89560276  | -0.42589039 | -9.28700000  |
| O | 4.95660276  | -7.78389039 | -2.96600000  |
| C | 0.50260276  | -5.44089039 | -1.69000000  |
| C | 2.35660276  | -6.31689039 | -7.15100000  |
| C | -0.15739724 | -4.18389039 | -1.30600000  |
| C | 2.21460276  | -5.22489039 | -8.13500000  |
| C | 3.17160276  | -8.24789039 | -5.38700000  |
| C | 0.41860276  | -3.73389039 | -0.11000000  |
| C | 1.45060276  | -6.82789039 | -6.22700000  |
| H | 0.55460276  | -6.51389039 | -6.22000000  |
| C | 3.67760276  | -6.77489039 | -7.19200000  |
| C | 0.28860276  | -6.26389039 | -2.79400000  |
| H | -0.39139724 | -6.04889039 | -3.42200000  |
| C | 2.26960276  | -6.88289039 | -0.89500000  |
| H | 2.93660276  | -7.11089039 | -0.25800000  |
| C | 1.49060276  | -5.73489039 | -0.73700000  |

|   |             |             |              |
|---|-------------|-------------|--------------|
| C | 1.27960276  | -3.33989039 | -9.31500000  |
| C | -0.79839724 | 1.67310961  | -3.38300000  |
| H | -0.53439724 | 2.52210961  | -3.04800000  |
| C | -0.47639724 | 1.27510961  | -4.67200000  |
| C | 2.04460276  | -7.67789039 | -2.00200000  |
| C | -0.46839724 | -1.23189039 | -7.38300000  |
| H | -0.98139724 | -1.99489039 | -7.14100000  |
| C | -1.16439724 | -3.46889039 | -1.93800000  |
| H | -1.54539724 | -3.79089039 | -2.74600000  |
| C | -0.35739724 | -0.15889039 | -6.50700000  |
| C | 1.85060276  | -7.79289039 | -5.31800000  |
| C | 1.07160276  | -7.40589039 | -2.97800000  |
| C | 0.17760276  | -1.18489039 | -8.62500000  |
| C | 1.51060276  | -4.67689039 | 0.34400000   |
| H | 1.30560276  | -5.06389039 | 1.23100000   |
| H | 2.38860276  | -4.21889039 | 0.38300000   |
| C | 3.45160276  | -5.02489039 | -8.74600000  |
| C | -0.89139724 | 0.02210961  | -5.15000000  |
| C | 0.91460276  | -0.03889039 | -8.91700000  |
| C | -1.02639724 | -1.84589039 | -0.17600000  |
| C | 4.09060276  | -7.76589039 | -6.30700000  |
| H | 4.97860276  | -8.10389039 | -6.33200000  |
| C | 0.35260276  | 1.98710961  | -5.71500000  |
| H | 1.26460276  | 2.18010961  | -5.38000000  |
| H | -0.07639724 | 2.83210961  | -6.00000000  |
| C | 1.13860276  | -4.40089039 | -8.41900000  |
| H | 0.29960276  | -4.55789039 | -8.00200000  |
| C | 0.92060276  | -8.26289039 | -4.21200000  |
| H | -0.01639724 | -8.22189039 | -4.52900000  |
| H | 1.12660276  | -9.20389039 | -3.98500000  |
| C | 4.47660276  | -6.01189039 | -8.21400000  |
| H | 4.80960276  | -6.60789039 | -8.93000000  |
| H | 5.24360276  | -5.54489039 | -7.79600000  |
| C | -0.03139724 | -2.55289039 | 0.47400000   |
| H | 0.33460276  | -2.24189039 | 1.29400000   |
| C | -1.52039724 | 0.78210961  | -2.59800000  |
| C | -1.61239724 | -2.27589039 | -1.37800000  |
| C | 2.53760276  | -3.15089039 | -9.89500000  |
| C | 0.38260276  | 0.97510961  | -6.84200000  |
| C | -1.63139724 | -0.83889039 | -4.35600000  |
| H | -1.91939724 | -1.67689039 | -4.69800000  |
| C | 3.61660276  | -3.98089039 | -9.65400000  |
| H | 4.44660276  | -3.84289039 | -10.09500000 |
| C | -1.94939724 | -0.46489039 | -3.04400000  |

|   |             |              |              |
|---|-------------|--------------|--------------|
| C | -2.64439724 | -1.44189039  | -2.10700000  |
| H | -3.19339724 | -0.94389039  | -1.45200000  |
| H | -3.24439724 | -2.03389039  | -2.62700000  |
| C | 3.44360276  | 0.12010961   | -11.97500000 |
| C | 4.75560276  | -10.52889039 | -2.53000000  |
| C | 1.03760276  | 1.03610961   | -8.05700000  |
| H | 1.55760276  | 1.79610961   | -8.29400000  |
| C | 0.12560276  | -2.37989039  | -9.56100000  |
| H | 0.15860276  | -2.06289039  | -10.49900000 |
| H | -0.73039724 | -2.85889039  | -9.43300000  |
| C | -1.77139724 | 1.82710961   | 1.21300000   |
| C | -2.09739724 | 4.06810961   | 2.00500000   |
| H | -1.94439724 | 5.00110961   | 1.92400000   |
| C | -2.86539724 | 3.58710961   | 3.03600000   |
| H | -3.24139724 | 4.19010961   | 3.66600000   |
| C | -1.55239724 | 3.20310961   | 1.09600000   |
| H | -1.02539724 | 3.54010961   | 0.38100000   |
| C | 5.32560276  | -11.40089039 | -3.43800000  |
| H | 5.32260276  | -11.19389039 | -4.36400000  |
| C | 4.62660276  | 0.82810961   | -12.05000000 |
| H | 5.16860276  | 0.93710961   | -11.27800000 |
| C | -2.53739724 | 1.35110961   | 2.25000000   |
| H | -2.68639724 | 0.41810961   | 2.34500000   |
| C | 2.64460276  | -0.04089039  | -13.09700000 |
| H | 1.82760276  | -0.51889039  | -13.04100000 |
| C | 4.77160276  | -10.85989039 | -1.17300000  |
| H | 4.38260276  | -10.26989039 | -0.53900000  |
| C | -3.09339724 | 2.24410961   | 3.16000000   |
| H | -3.63339724 | 1.92010961   | 3.87000000   |
| C | 4.22660276  | 1.21110961   | -14.37600000 |
| H | 4.50060276  | 1.59010961   | -15.20400000 |
| C | 3.05960276  | 0.51210961   | -14.30500000 |
| H | 2.52660276  | 0.40010961   | -15.08400000 |
| C | 5.90960276  | -12.88889039 | -1.65400000  |
| H | 6.30760276  | -13.69889039 | -1.35600000  |
| C | 5.89960276  | -12.57689039 | -2.99400000  |
| H | 6.29060276  | -13.17489039 | -3.62000000  |
| C | 5.01360276  | 1.37210961   | -13.25600000 |
| H | 5.82660276  | 1.85910961   | -13.31500000 |
| C | 5.34860276  | -12.03489039 | -0.75100000  |
| H | 5.35560276  | -12.25289039 | 0.17200000   |
| C | 5.84760276  | -2.71889039  | -6.76500000  |
| C | 7.03760276  | -3.41489039  | -6.58700000  |
| H | 7.81260276  | -3.16289039  | -7.07300000  |



|   |            |             |             |
|---|------------|-------------|-------------|
| C | 7.09160276 | -4.48289039 | -5.69800000 |
| H | 7.90460276 | -4.95789039 | -5.57700000 |
| C | 5.95560276 | -4.85389039 | -4.98800000 |
| H | 5.99360276 | -5.58289039 | -4.38000000 |
| C | 4.76660276 | -4.15789039 | -5.16600000 |
| C | 4.71160276 | -3.09089039 | -6.05400000 |
| C | 3.52160276 | -2.39489039 | -6.23200000 |
| H | 3.48460276 | -1.66489039 | -6.84000000 |
| C | 2.38660276 | -2.76589039 | -5.52200000 |
| H | 1.57360276 | -2.28889039 | -5.64300000 |
| C | 2.44060276 | -3.83289039 | -4.63300000 |
| H | 1.66460276 | -4.08689039 | -4.14900000 |
| C | 3.63060276 | -4.52889039 | -4.45500000 |
| H | 3.66860276 | -5.25989039 | -3.84800000 |
| C | 5.91160276 | -1.60889039 | -7.61000000 |
| H | 5.02760276 | -1.19089039 | -7.66800000 |
| H | 6.55460276 | -0.96289039 | -7.25300000 |
| H | 6.19760276 | -1.89489039 | -8.50300000 |

**Coordinates of the fully optimized structure of F[3]A1-[P(O)Ph]<sub>3</sub> with (G35) Ethylferrocene**

|    |             |             |             |
|----|-------------|-------------|-------------|
| Fe | 0.18835616  | 2.26883568  | 0.00000000  |
| C  | -1.64564384 | 2.64383568  | 0.79000000  |
| H  | -2.01064384 | 2.25283568  | 1.63600000  |
| C  | 1.17435616  | 0.94383568  | 1.23800000  |
| C  | 0.00835616  | -0.42516432 | 2.74700000  |
| H  | -0.15964384 | -0.48316432 | 3.71200000  |
| H  | -0.84364384 | -0.32016432 | 2.27400000  |
| H  | 0.45535616  | -1.24116432 | 2.44200000  |
| C  | 2.21535616  | 2.48583568  | -0.26500000 |
| H  | 2.66435616  | 3.25283568  | -0.59800000 |
| C  | 1.69635616  | 1.35183568  | -1.03700000 |
| H  | 1.76335616  | 1.24383568  | -1.97800000 |
| C  | 1.09535616  | 0.46683568  | -0.15700000 |
| H  | 0.68335616  | -0.34916432 | -0.41800000 |
| C  | 1.91535616  | 2.19983568  | 1.03900000  |
| H  | 2.16535616  | 2.76783568  | 1.76000000  |
| C  | -0.90764384 | 3.82783568  | 0.68700000  |
| H  | -0.67564384 | 4.40583568  | 1.40400000  |
| C  | -1.78864384 | 2.11383568  | -0.46800000 |
| H  | -2.25464384 | 1.31883568  | -0.69800000 |

|   |             |             |             |
|---|-------------|-------------|-------------|
| C | 0.79135616  | 0.63383568  | 2.49600000  |
| H | 1.61735616  | 0.51583568  | 3.02800000  |
| H | 0.32835616  | 1.42883568  | 2.86100000  |
| C | -1.10464384 | 2.98283568  | -1.36100000 |
| H | -1.03364384 | 2.86083568  | -2.30000000 |
| C | -0.56964384 | 4.01583568  | -0.66000000 |
| H | -0.05964384 | 4.73283568  | -1.01700000 |
| P | 3.42035616  | -1.31216432 | -4.29100000 |
| P | -1.02264384 | 8.54183568  | -1.63800000 |
| P | 2.49935616  | 1.49283568  | 6.60300000  |
| O | 3.91035616  | -0.04116432 | -5.12700000 |
| O | 4.58435616  | -1.60416432 | -3.23900000 |
| O | 0.07835616  | 8.41383568  | -2.78000000 |
| O | -0.26764384 | 8.97883568  | -0.31000000 |
| O | 2.10035616  | -1.16916432 | -3.69600000 |
| O | 2.75135616  | 3.06983568  | 6.61900000  |
| O | 3.80635616  | 0.85683568  | 5.97800000  |
| O | -1.84264384 | 7.34283568  | -1.48900000 |
| O | 1.25235616  | 1.08083568  | 5.96700000  |
| C | 2.78135616  | 5.95683568  | -2.40500000 |
| H | 3.58235616  | 5.82683568  | -1.90800000 |
| C | 2.38935616  | 5.02883568  | -3.34900000 |
| C | 1.68935616  | 6.36283568  | 2.22700000  |
| C | 3.60935616  | 1.24783568  | -4.64000000 |
| C | 4.75135616  | 0.12383568  | 0.51600000  |
| C | 2.18535616  | 3.14383568  | -4.70600000 |
| C | 5.23935616  | 0.83783568  | -0.57100000 |
| H | 5.61435616  | 1.70083568  | -0.44300000 |
| C | 2.15035616  | 5.45783568  | 3.28400000  |
| C | 3.36435616  | 4.78483568  | 3.42200000  |
| H | 4.04435616  | 4.88383568  | 2.76500000  |
| C | 3.57335616  | 3.96383568  | 4.53300000  |
| C | 4.43435616  | 1.82283568  | -3.67700000 |
| C | 5.17635616  | 0.28383568  | -1.84600000 |
| C | 2.98335616  | 3.73883568  | -3.72100000 |
| C | 0.38935616  | 8.06883568  | 0.53000000  |
| C | 2.50235616  | 1.88583568  | -5.18000000 |
| H | 1.97935616  | 1.47183568  | -5.85600000 |
| C | 1.98735616  | 7.09583568  | -2.18900000 |
| C | 4.95335616  | 1.68083568  | 2.58300000  |
| H | 5.37435616  | 2.38783568  | 2.10800000  |
| C | 2.32535616  | 6.78983568  | 1.07200000  |
| H | 3.20535616  | 6.48983568  | 0.87900000  |
| C | 1.01435616  | 4.03983568  | -5.04000000 |

|   |             |             |             |
|---|-------------|-------------|-------------|
| H | 1.03735616  | 4.32483568  | -5.98800000 |
| H | 0.15135616  | 3.58783568  | -4.85700000 |
| C | 4.63435616  | 0.50083568  | 1.93600000  |
| C | 4.10935616  | 3.10183568  | -3.22000000 |
| H | 4.65435616  | 3.53183568  | -2.57300000 |
| C | 1.68335616  | 7.65183568  | 0.19800000  |
| C | 4.61635616  | -0.99516432 | -1.97100000 |
| C | 1.22835616  | 5.20883568  | -4.11200000 |
| C | 4.65435616  | 1.82183568  | 3.94100000  |
| C | 0.85035616  | 7.24783568  | -2.95600000 |
| C | 2.34835616  | 8.06583568  | -1.08700000 |
| H | 3.33035616  | 8.08083568  | -0.96500000 |
| H | 2.05435616  | 8.97783568  | -1.33600000 |
| C | 4.01735616  | -0.55316432 | 2.63200000  |
| C | 4.05435616  | 0.75183568  | 4.59200000  |
| C | 2.70435616  | 1.08383568  | 8.31500000  |
| C | -0.04664384 | 6.18083568  | 3.84700000  |
| H | -0.22964384 | 6.87683568  | 4.52700000  |
| H | -0.85664384 | 5.62583568  | 3.72500000  |
| C | 4.75235616  | -2.68116432 | -6.27500000 |
| H | 5.42135616  | -2.00816432 | -6.21800000 |
| C | 1.14235616  | 5.33583568  | 4.23700000  |
| C | 2.54235616  | 3.84983568  | 5.45900000  |
| C | 0.40135616  | 6.79583568  | 2.53800000  |
| C | 3.64935616  | -2.62716432 | -5.45200000 |
| C | -0.26564384 | 7.66083568  | 1.68800000  |
| H | -1.14164384 | 7.96583568  | 1.88900000  |
| C | 5.59935616  | 1.07183568  | -3.06900000 |
| H | 6.30735616  | 1.71683568  | -2.81500000 |
| H | 5.97835616  | 0.45283568  | -3.74200000 |
| C | 1.33335616  | 4.52283568  | 5.35700000  |
| H | 0.66135616  | 4.43483568  | 6.02300000  |
| C | 4.21335616  | -1.16016432 | 0.35300000  |
| C | 0.44935616  | 6.34283568  | -3.92400000 |
| H | -0.33164384 | 6.49383568  | -4.44400000 |
| C | 4.85635616  | 3.15383568  | 4.64500000  |
| H | 5.60535616  | 3.64683568  | 4.22600000  |
| H | 5.07835616  | 3.00183568  | 5.59800000  |
| C | 4.15235616  | -1.73316432 | -0.90200000 |
| H | 3.80135616  | -2.60716432 | -1.02500000 |
| C | 3.63635616  | 1.73283568  | 9.11800000  |
| H | 4.16735616  | 2.43283568  | 8.75600000  |
| C | 3.71135616  | -0.42216432 | 4.01100000  |
| H | 3.28835616  | -1.11816432 | 4.50000000  |

|   |             |             |             |
|---|-------------|-------------|-------------|
| C | 2.65635616  | -3.60416432 | -5.55100000 |
| H | 1.89035616  | -3.56616432 | -4.98900000 |
| C | 3.72735616  | -1.70216432 | 1.69400000  |
| H | 2.76035616  | -1.91016432 | 1.66900000  |
| H | 4.22835616  | -2.51416432 | 1.95700000  |
| C | 4.88335616  | -3.71416432 | -7.18300000 |
| H | 5.65535616  | -3.76716432 | -7.73500000 |
| C | -1.78864384 | 10.07583568 | -2.12200000 |
| C | 1.95435616  | 0.04883568  | 8.84500000  |
| H | 1.32435616  | -0.40416432 | 8.29800000  |
| C | 3.79335616  | 1.36683568  | 10.42400000 |
| H | 4.42235616  | 1.81983568  | 10.97000000 |
| C | 3.03435616  | 0.33383568  | 10.95300000 |
| H | 3.14735616  | 0.08483568  | 11.86300000 |
| C | 2.11435616  | -0.33616432 | 10.16600000 |
| H | 1.59935616  | -1.04716432 | 10.52800000 |
| C | -2.06664384 | 11.06383568 | -1.19900000 |
| H | -1.83164384 | 10.94383568 | -0.28700000 |
| C | -2.12164384 | 10.27783568 | -3.42500000 |
| H | -1.91764384 | 9.60683568  | -4.06700000 |
| C | 3.90435616  | -4.66516432 | -7.28500000 |
| H | 3.98835616  | -5.36016432 | -7.92600000 |
| C | 2.79235616  | -4.61916432 | -6.46100000 |
| H | 2.12335616  | -5.29116432 | -6.52900000 |
| C | -3.03264384 | 12.41683568 | -2.87800000 |
| H | -3.47264384 | 13.21983568 | -3.13900000 |
| C | -2.74864384 | 11.43783568 | -3.83500000 |
| H | -2.98364384 | 11.56883568 | -4.74500000 |
| C | -2.69164384 | 12.23083568 | -1.61200000 |
| H | -2.87864384 | 12.91083568 | -0.97700000 |

**Coordinates of the fully optimized structure of F[3]A1-[P(O)Ph]<sub>3</sub> with (G36) 18-crown-6**

|   |             |             |             |
|---|-------------|-------------|-------------|
| P | 3.39900000  | -0.43600000 | 16.27900000 |
| P | -1.71900000 | 2.15700000  | 7.08800000  |
| P | 6.27100000  | 9.24100000  | 10.70900000 |
| O | 1.80100000  | -0.47700000 | 16.43100000 |
| O | 3.85900000  | 0.93500000  | 16.92200000 |
| O | -2.63300000 | 1.69700000  | 8.31300000  |
| O | -1.91500000 | 3.73300000  | 6.94900000  |
| O | 6.10300000  | 9.02700000  | 12.26500000 |

|   |             |             |             |
|---|-------------|-------------|-------------|
| O | 4.85200000  | 9.69600000  | 10.16200000 |
| O | 3.88700000  | -0.64900000 | 14.92500000 |
| O | -0.31800000 | 1.73600000  | 7.19300000  |
| O | 6.86100000  | 8.09800000  | 10.03000000 |
| C | 0.02600000  | 2.03100000  | 14.41200000 |
| H | -0.14800000 | 2.96500000  | 14.39600000 |
| C | -0.45900000 | 1.22100000  | 13.40900000 |
| C | 4.04800000  | 4.56500000  | 14.93900000 |
| C | 0.76700000  | 6.12500000  | 7.64200000  |
| C | -1.29200000 | 0.37200000  | 11.42000000 |
| C | -1.14200000 | 1.55300000  | 12.15600000 |
| C | 0.50400000  | -0.72500000 | 14.45500000 |
| H | 0.66100000  | -1.66100000 | 14.48500000 |
| C | 0.53800000  | 6.34800000  | 9.00000000  |
| C | 2.81400000  | 4.11500000  | 15.40500000 |
| H | 2.03300000  | 4.64000000  | 15.27600000 |
| C | 1.00700000  | 0.11100000  | 15.42600000 |
| C | 5.15700000  | 2.59500000  | 15.78400000 |
| H | 5.94100000  | 2.07800000  | 15.92800000 |
| C | -0.50500000 | 5.72100000  | 9.67200000  |
| H | -0.64100000 | 5.89100000  | 10.59600000 |
| C | 2.73400000  | 2.88900000  | 16.06100000 |
| C | 0.77200000  | 1.47700000  | 15.44800000 |
| C | 4.38400000  | 5.78300000  | 14.20200000 |
| C | -0.23300000 | -0.16100000 | 13.44000000 |
| C | -2.06700000 | 2.83700000  | 10.34100000 |
| C | 3.57000000  | 6.80700000  | 13.74800000 |
| H | 2.63400000  | 6.78000000  | 13.91200000 |
| C | 1.57300000  | 7.25500000  | 9.48900000  |
| C | 3.91500000  | 2.15600000  | 16.22200000 |
| C | -1.76200000 | 0.41800000  | 10.12900000 |
| H | -1.83300000 | -0.37000000 | 9.60500000  |
| C | -0.81600000 | -0.81400000 | 12.22600000 |
| H | -1.56800000 | -1.41100000 | 12.46600000 |
| H | -0.13200000 | -1.33300000 | 11.73400000 |
| C | -2.12900000 | 1.65200000  | 9.61900000  |
| C | -0.05100000 | 5.24400000  | 6.96500000  |
| H | 0.08700000  | 5.06900000  | 6.04100000  |
| C | 5.76900000  | 5.78900000  | 13.95400000 |
| C | 4.12700000  | 7.87800000  | 13.05000000 |
| C | -1.35100000 | 4.84500000  | 8.99700000  |
| C | 2.91700000  | 8.52200000  | 11.01100000 |
| C | -1.54600000 | 2.77300000  | 11.62400000 |
| H | -1.46400000 | 3.56600000  | 12.14100000 |

|   |             |             |             |
|---|-------------|-------------|-------------|
| C | 1.81400000  | 7.70700000  | 10.76900000 |
| H | 1.23200000  | 7.46500000  | 11.48000000 |
| C | 5.21300000  | 3.81500000  | 15.13100000 |
| C | -2.49100000 | 4.15700000  | 9.72900000  |
| H | -2.82500000 | 4.75400000  | 10.44500000 |
| H | -3.23500000 | 3.99700000  | 9.09500000  |
| C | -1.07900000 | 4.61700000  | 7.65800000  |
| C | 1.38300000  | 2.35400000  | 16.51000000 |
| H | 1.49600000  | 1.83300000  | 17.34400000 |
| H | 0.77600000  | 3.11200000  | 16.70100000 |
| C | 3.91700000  | -1.59600000 | 17.51600000 |
| C | 5.51400000  | 7.88600000  | 12.85700000 |
| C | 6.34600000  | 6.86300000  | 13.28100000 |
| H | 7.28100000  | 6.89300000  | 13.11800000 |
| C | 3.24900000  | 8.93500000  | 12.42400000 |
| H | 2.41600000  | 9.03500000  | 12.95000000 |
| H | 3.72000000  | 9.80500000  | 12.41900000 |
| C | 6.40600000  | 4.53700000  | 14.51600000 |
| H | 7.08600000  | 4.75700000  | 15.20100000 |
| H | 6.82600000  | 3.99500000  | 13.80300000 |
| C | 1.97400000  | 6.91400000  | 7.17600000  |
| H | 2.68000000  | 6.31600000  | 6.82300000  |
| H | 1.72600000  | 7.57100000  | 6.47800000  |
| C | 5.29500000  | -1.79800000 | 17.65700000 |
| H | 5.90500000  | -1.33200000 | 17.09900000 |
| C | 3.75200000  | 8.83800000  | 9.94200000  |
| C | 2.42100000  | 7.59800000  | 8.43000000  |
| C | 3.01700000  | -2.28500000 | 18.33200000 |
| H | 2.08100000  | -2.15800000 | 18.23000000 |
| C | -2.66600000 | 1.54000000  | 5.72600000  |
| C | 3.53500000  | 8.40500000  | 8.65300000  |
| H | 4.12000000  | 8.64700000  | 7.94500000  |
| C | -2.71300000 | 0.16200000  | 5.55900000  |
| H | -2.28700000 | -0.41100000 | 6.18500000  |
| C | 7.17100000  | 10.78000000 | 10.61600000 |
| C | -3.30700000 | 2.37700000  | 4.81700000  |
| H | -3.28400000 | 3.32000000  | 4.93500000  |
| C | 3.50300000  | -3.15100000 | 19.28800000 |
| H | 2.90000000  | -3.61800000 | 19.85300000 |
| C | -4.00700000 | 0.46300000  | 3.56800000  |
| H | -4.46000000 | 0.09500000  | 2.81800000  |
| C | -3.38500000 | -0.37100000 | 4.47100000  |
| H | -3.41800000 | -1.31200000 | 4.34800000  |
| C | 5.76300000  | -2.67800000 | 18.61100000 |

|   |             |             |             |
|---|-------------|-------------|-------------|
| H | 6.69600000  | -2.82600000 | 18.70700000 |
| C | -3.97500000 | 1.82300000  | 3.74400000  |
| H | -4.41700000 | 2.38900000  | 3.12200000  |
| C | 6.51400000  | 11.99800000 | 10.62100000 |
| H | 5.56900000  | 12.02600000 | 10.70900000 |
| C | 4.86700000  | -3.34200000 | 19.42800000 |
| H | 5.19100000  | -3.93800000 | 20.09300000 |
| C | 7.23100000  | 13.17700000 | 10.49800000 |
| H | 6.77700000  | 14.01200000 | 10.49600000 |
| C | 8.55200000  | 10.74400000 | 10.50200000 |
| H | 9.01300000  | 9.91400000  | 10.50500000 |
| C | 9.26100000  | 11.94900000 | 10.38200000 |
| H | 10.20800000 | 11.93500000 | 10.30100000 |
| C | 8.59400000  | 13.14000000 | 10.38100000 |
| H | 9.08100000  | 13.95100000 | 10.29800000 |
| O | 0.34600000  | 9.35300000  | 14.68000000 |
| O | -1.87000000 | 8.90200000  | 13.17800000 |
| C | -0.19400000 | 10.36500000 | 13.85300000 |
| H | 0.52200000  | 10.98900000 | 13.57700000 |
| H | -0.87600000 | 10.87800000 | 14.35500000 |
| C | 0.78600000  | 9.87700000  | 15.89800000 |
| H | 0.03500000  | 10.32000000 | 16.36700000 |
| H | 1.49600000  | 10.54800000 | 15.74100000 |
| C | -3.99200000 | 5.32200000  | 13.88300000 |
| H | -4.50600000 | 4.95400000  | 13.12100000 |
| H | -4.60600000 | 5.87300000  | 14.42900000 |
| C | -0.80300000 | 9.76000000  | 12.67600000 |
| H | -0.13600000 | 9.22800000  | 12.17300000 |
| H | -1.16900000 | 10.45700000 | 12.07600000 |
| C | -3.47000000 | 7.28000000  | 12.69900000 |
| H | -4.02900000 | 7.79800000  | 13.32900000 |
| H | -4.05900000 | 6.95900000  | 11.97000000 |
| C | -2.44900000 | 8.18700000  | 12.11500000 |
| H | -1.75700000 | 7.66200000  | 11.63900000 |
| H | -2.87000000 | 8.80900000  | 11.47200000 |
| O | -2.93400000 | 6.13700000  | 13.39100000 |
| O | -3.01900000 | 4.71600000  | 15.93400000 |
| O | -0.80300000 | 5.16700000  | 17.43500000 |
| C | -2.47900000 | 3.70500000  | 16.76100000 |
| H | -3.19600000 | 3.08100000  | 17.03700000 |
| H | -1.79800000 | 3.19100000  | 16.25900000 |
| C | -3.45900000 | 4.19300000  | 14.71600000 |
| H | -2.70800000 | 3.75000000  | 14.24700000 |
| H | -4.16900000 | 3.52200000  | 14.87200000 |

|   |             |            |             |
|---|-------------|------------|-------------|
| C | 1.31900000  | 8.74700000 | 16.73000000 |
| H | 1.83300000  | 9.11600000 | 17.49200000 |
| H | 1.93300000  | 8.19600000 | 16.18400000 |
| C | -1.87000000 | 4.30900000 | 17.93800000 |
| H | -2.53700000 | 4.84200000 | 18.44100000 |
| H | -1.50400000 | 3.61200000 | 18.53800000 |
| C | 0.79700000  | 6.79000000 | 17.91500000 |
| H | 1.35600000  | 6.27200000 | 17.28500000 |
| H | 1.38600000  | 7.11100000 | 18.64400000 |
| C | -0.22400000 | 5.88300000 | 18.49800000 |
| H | -0.91600000 | 6.40700000 | 18.97500000 |
| H | 0.19700000  | 5.26100000 | 19.14200000 |
| O | 0.26100000  | 7.93300000 | 17.22300000 |

**Coordinates of the fully optimized structure of F[3]A1-[P(O)Ph]<sub>3</sub> with (G37) dithianon**

|   |             |             |             |
|---|-------------|-------------|-------------|
| P | -0.32534246 | 2.45719185  | 0.00000000  |
| P | -6.47734246 | -2.57680815 | 7.76700000  |
| P | -6.25734246 | 8.49219185  | 7.65500000  |
| O | -1.77934246 | 2.35919185  | -0.11200000 |
| O | 0.32665754  | 1.24719185  | 0.81400000  |
| O | -6.30134246 | -1.85680815 | 9.17700000  |
| O | -4.80534246 | 8.86919185  | 7.13700000  |
| O | -5.04234246 | -3.17180815 | 7.40900000  |
| O | -6.06234246 | 7.72419185  | 9.03000000  |
| O | 0.19365754  | 3.78819185  | 0.70100000  |
| O | -7.03834246 | -1.71980815 | 6.72100000  |
| O | -7.04834246 | 7.74819185  | 6.68500000  |
| C | -5.33434246 | 2.18119185  | 9.31400000  |
| C | -2.39734246 | 6.26119185  | 4.99100000  |
| C | -5.29934246 | 3.65019185  | 9.28000000  |
| C | -1.63334246 | 5.48819185  | 4.00900000  |
| C | -6.66534246 | 1.77319185  | 9.47000000  |
| C | -1.53834246 | -0.22480815 | 4.21300000  |
| C | -2.45834246 | 6.15619185  | 6.36800000  |
| H | -1.94034246 | 5.49319185  | 6.81100000  |
| C | -1.77134246 | -0.84480815 | 2.97100000  |
| C | -5.96434246 | -0.47680815 | 9.22500000  |
| C | -4.48034246 | 5.89919185  | 8.96500000  |
| C | -6.60934246 | 4.12819185  | 9.43000000  |
| C | -4.32334246 | 1.24319185  | 9.14100000  |



|   |             |             |             |
|---|-------------|-------------|-------------|
| H | -3.42134246 | 1.53019185  | 9.06000000  |
| C | -0.75934246 | 4.43119185  | 4.18700000  |
| H | -0.57834246 | 4.11019185  | 5.06200000  |
| C | -2.34734246 | -0.91480815 | 5.22400000  |
| C | -6.98734246 | 0.42719185  | 9.43200000  |
| H | -7.88434246 | 0.13519185  | 9.54500000  |
| C | -0.45234246 | 4.34819185  | 1.83400000  |
| C | -2.48034246 | -0.67780815 | 6.58400000  |
| H | -1.96134246 | -0.00080815 | 7.00100000  |
| C | -4.24334246 | 4.52419185  | 9.06700000  |
| H | -3.35834246 | 4.18819185  | 8.99200000  |
| C | -3.37234246 | -1.42880815 | 7.34000000  |
| C | -3.14134246 | 7.24019185  | 4.31300000  |
| C | -4.12334246 | -2.40080815 | 6.67700000  |
| C | -3.99834246 | -2.66880815 | 5.32000000  |
| H | -4.52134246 | -3.34280815 | 4.90300000  |
| C | -4.62634246 | -0.11580815 | 9.08600000  |
| C | -3.08734246 | -1.92080815 | 4.59800000  |
| C | -1.30634246 | 5.41819185  | 1.62200000  |
| H | -1.47834246 | 5.74419185  | 0.74600000  |
| C | -0.14434246 | 3.83619185  | 3.09100000  |
| C | 0.63365754  | 2.45019185  | -1.49600000 |
| C | -1.15034246 | -0.34780815 | 1.82500000  |
| H | -1.29434246 | -0.74780815 | 0.97600000  |
| C | -3.37434246 | 6.85919185  | 8.60600000  |
| H | -3.55934246 | 7.74319185  | 9.01300000  |
| H | -2.51634246 | 6.52619185  | 8.97000000  |
| C | -1.89834246 | 5.99419185  | 2.72900000  |
| C | -3.96934246 | 8.09619185  | 5.02900000  |
| H | -4.48734246 | 8.75919185  | 4.58900000  |
| C | -6.86234246 | 5.48119185  | 9.34000000  |
| H | -7.74434246 | 5.81719185  | 9.44300000  |
| C | -4.01234246 | 7.95019185  | 6.40500000  |
| C | -3.55134246 | -1.15180815 | 8.82300000  |
| H | -3.79134246 | -1.99480815 | 9.28500000  |
| H | -2.69234246 | -0.83380815 | 9.20000000  |
| C | -2.85834246 | 7.16319185  | 2.83200000  |
| H | -2.44034246 | 7.99819185  | 2.50600000  |
| H | -3.68734246 | 6.99119185  | 2.31900000  |
| C | -3.26534246 | 7.00319185  | 7.11300000  |
| C | -0.69234246 | 0.86619185  | 4.31500000  |
| H | -0.53834246 | 1.26519185  | 5.16300000  |
| C | 0.76165754  | 2.64719185  | 3.26600000  |
| H | 1.21565754  | 2.69719185  | 4.14400000  |

|   |             |             |             |
|---|-------------|-------------|-------------|
| H | 1.45265754  | 2.64419185  | 2.55800000  |
| C | -0.31534246 | 0.75019185  | 1.96600000  |
| C | -5.80134246 | 6.33519185  | 9.09900000  |
| C | -2.74934246 | -1.98380815 | 3.12600000  |
| H | -2.33134246 | -2.84980815 | 2.88900000  |
| H | -3.55334246 | -1.84480815 | 2.56500000  |
| C | -7.39734246 | -4.03580815 | 8.20600000  |
| C | -7.76234246 | -4.90580815 | 7.17700000  |
| H | -7.45734246 | -4.75280815 | 6.29100000  |
| C | -0.06634246 | 1.38019185  | 3.18500000  |
| C | 0.37665754  | 3.45419185  | -2.43100000 |
| H | -0.25834246 | 4.13319185  | -2.23800000 |
| C | -7.57034246 | 2.97019185  | 9.58300000  |
| H | -8.02534246 | 2.99419185  | 10.46200000 |
| H | -8.25134246 | 2.97319185  | 8.86400000  |
| C | -8.57434246 | -5.99480815 | 7.45600000  |
| H | -8.83034246 | -6.58380815 | 6.75700000  |
| C | -9.00934246 | -6.22580815 | 8.74200000  |
| H | -9.55834246 | -6.97880815 | 8.92500000  |
| C | -7.83534246 | -4.27680815 | 9.49400000  |
| H | -7.57834246 | -3.69380815 | 10.20000000 |
| C | 1.98165754  | 2.48219185  | -3.91000000 |
| H | 2.45065754  | 2.49719185  | -4.73700000 |
| C | 1.04765754  | 3.46219185  | -3.63800000 |
| H | 0.86565754  | 4.13819185  | -4.27800000 |
| C | 1.56865754  | 1.45719185  | -1.78000000 |
| H | 1.74165754  | 0.77019185  | -1.14800000 |
| C | -8.65434246 | -5.37480815 | 9.75900000  |
| H | -8.96434246 | -5.53380815 | 10.64200000 |
| C | 2.24365754  | 1.47819185  | -2.99200000 |
| H | 2.88365754  | 0.80619185  | -3.19100000 |
| C | -6.64734246 | 10.16519185 | 8.28400000  |
| C | -5.87834246 | 10.80519185 | 9.24900000  |
| H | -5.09234246 | 10.39019185 | 9.58300000  |
| C | -6.26234246 | 12.05419185 | 9.72600000  |
| H | -5.73634246 | 12.49119185 | 10.38700000 |
| C | -7.41234246 | 12.66119185 | 9.23700000  |
| H | -7.67434246 | 13.51519185 | 9.56400000  |
| C | -8.18134246 | 12.02019185 | 8.27300000  |
| H | -8.96734246 | 12.43719185 | 7.93900000  |
| C | -7.79934246 | 10.77219185 | 7.79600000  |
| H | -8.32334246 | 10.33319185 | 7.13800000  |
| C | 2.36065754  | -0.85280815 | 4.05200000  |
| C | 2.02165754  | -1.64080815 | 2.95900000  |

|   |             |              |             |
|---|-------------|--------------|-------------|
| C | 2.56465754  | -1.36680815  | 1.70900000  |
| C | 3.24365754  | 0.20919185   | 3.89600000  |
| C | 0.82865754  | -2.33880815  | 5.57700000  |
| C | 0.50065754  | -3.10980815  | 4.53100000  |
| C | -1.78734246 | -5.74580815  | 6.29900000  |
| H | -2.01034246 | -6.29080815  | 5.55400000  |
| C | -0.97534246 | -4.63080815  | 6.12600000  |
| C | -0.64934246 | -3.83280815  | 7.21600000  |
| C | -1.13434246 | -4.14980815  | 8.47900000  |
| H | -0.91134246 | -3.60380815  | 9.22600000  |
| C | -1.94634246 | -5.26480815  | 8.65300000  |
| H | -2.27834246 | -5.47980815  | 9.51700000  |
| C | -2.27334246 | -6.06280815  | 7.56300000  |
| H | -2.82834246 | -6.82480815  | 7.68200000  |
| O | -0.78734246 | -5.08180815  | 3.83900000  |
| S | 1.75265754  | -1.03780815  | 5.76200000  |
| C | 0.28565754  | -2.63380815  | 6.77400000  |
| S | 0.85565754  | -3.06280815  | 3.02800000  |
| N | 3.99865754  | 1.02819185   | 3.94600000  |
| O | 0.53665754  | -1.98080815  | 8.04300000  |
| C | -0.51634246 | -4.30980815  | 4.98800000  |
| N | 2.98665754  | -1.19480815  | 0.67300000  |
| P | 1.93165754  | -8.07980815  | 10.26000000 |
| P | 7.62465754  | -2.82980815  | 2.44700000  |
| P | 7.51665754  | -13.94780815 | 2.26400000  |
| O | 3.38965754  | -7.96480815  | 10.20100000 |
| O | 1.16865754  | -6.87780815  | 9.53800000  |
| O | 1.35865754  | -9.41180815  | 9.60500000  |
| O | 6.19765754  | -2.23880815  | 2.83400000  |
| O | 8.18965754  | -3.70380815  | 3.47100000  |
| O | 7.41965754  | -3.52380815  | 1.02600000  |
| O | 6.08565754  | -14.31980815 | 2.83100000  |
| O | 7.27165754  | -13.10680815 | 0.93300000  |
| O | 8.37665754  | -13.29180815 | 3.23900000  |
| C | 3.04565754  | -11.03680815 | 6.18000000  |
| C | 2.15965754  | -9.97580815  | 6.06300000  |
| H | 1.94765754  | -9.62880815  | 5.20600000  |
| C | 7.80665754  | -7.13780815  | 0.61100000  |
| C | 1.57965754  | -9.42180815  | 7.19400000  |
| C | 3.03965754  | -4.65580815  | 7.31900000  |
| C | 3.77865754  | -11.76780815 | 5.15600000  |
| C | 5.43365754  | -9.92180815  | 1.04700000  |
| H | 4.54865754  | -9.59780815  | 1.17200000  |
| C | 6.48865754  | -7.56480815  | 0.80800000  |

|   |             |              |             |
|---|-------------|--------------|-------------|
| C | 1.94565754  | -9.96080815  | 8.43400000  |
| C | 3.66765754  | -4.77680815  | 3.69000000  |
| H | 3.14665754  | -5.45480815  | 3.27600000  |
| C | 1.70865754  | -6.32280815  | 8.35500000  |
| C | 2.79165754  | -5.26680815  | 6.08100000  |
| C | 3.55865754  | -4.55180815  | 5.05400000  |
| C | 1.16465754  | -8.09980815  | 11.86700000 |
| C | 4.54365754  | -4.00780815  | 2.92300000  |
| C | 3.78365754  | -11.62180815 | 3.77700000  |
| H | 3.25265754  | -10.94480815 | 3.37300000  |
| C | 2.81465754  | -11.02480815 | 8.58000000  |
| H | 3.02965754  | -11.36680815 | 9.44100000  |
| C | 3.36465754  | -11.57780815 | 7.43900000  |
| C | 5.18665754  | -2.76680815  | 4.93800000  |
| H | 5.70365754  | -2.08380815  | 5.34800000  |
| C | 4.55065754  | -12.76680815 | 5.77000000  |
| C | 2.49565754  | -5.18680815  | 8.46900000  |
| H | 2.65465754  | -4.78580815  | 9.31600000  |
| C | 8.11165754  | -5.78880815  | 0.67300000  |
| H | 8.99865754  | -5.48280815  | 0.52900000  |
| C | 6.46865754  | -9.02980815  | 0.80300000  |
| C | 7.77065754  | -9.49380815  | 0.59100000  |
| C | 4.55865754  | -12.45380815 | 2.98200000  |
| C | 5.46965754  | -6.63980815  | 1.04000000  |
| H | 4.57465754  | -6.93980815  | 1.14100000  |
| C | 5.29665754  | -3.03380815  | 3.58400000  |
| C | 4.68665754  | -4.25880815  | 1.43800000  |
| H | 4.90765754  | -3.40680815  | 0.98500000  |
| H | 3.81965754  | -4.57680815  | 1.08000000  |
| C | 5.76065754  | -5.28280815  | 1.12200000  |
| C | 3.97365754  | -3.48480815  | 7.15000000  |
| H | 4.79065754  | -3.59380815  | 7.69800000  |
| H | 3.53065754  | -2.63380815  | 7.39300000  |
| C | 1.98465754  | -6.39280815  | 5.98700000  |
| H | 1.80865754  | -6.78480815  | 5.14000000  |
| C | 4.59365754  | -12.27180815 | 1.48600000  |
| H | 3.71865754  | -11.93280815 | 1.17200000  |
| H | 4.76265754  | -13.14380815 | 1.04900000  |
| C | 4.29465754  | -3.53080815  | 5.67700000  |
| C | 1.59365754  | -9.05980815  | 12.76500000 |
| H | 2.24265754  | -9.70080815  | 12.50100000 |
| C | 5.68865754  | -11.28880815 | 1.10900000  |
| C | 0.64665754  | -8.23780815  | 7.08100000  |
| H | -0.01234246 | -8.26180815  | 7.82100000  |

|   |             |              |             |
|---|-------------|--------------|-------------|
| H | 0.15165754  | -8.28480815  | 6.22500000  |
| C | 4.32165754  | -12.73380815 | 7.26800000  |
| H | 3.91965754  | -13.58080815 | 7.58700000  |
| H | 5.16765754  | -12.57180815 | 7.75500000  |
| C | 8.96365754  | -0.54080815  | 3.05400000  |
| H | 8.64965754  | -0.69380815  | 3.93900000  |
| C | 7.09165754  | -4.90180815  | 0.95200000  |
| C | 1.43365754  | -6.94480815  | 7.14400000  |
| C | 8.56265754  | -1.37980815  | 2.02500000  |
| C | 5.34065754  | -13.41880815 | 3.63100000  |
| C | 8.72065754  | -8.32480815  | 0.41800000  |
| H | 9.43865754  | -8.34080815  | 1.10100000  |
| H | 9.12865754  | -8.32280815  | -0.48300000 |
| C | 5.35765754  | -13.59380815 | 5.00100000  |
| H | 5.90365754  | -14.25780815 | 5.40500000  |
| C | 9.82365754  | 0.52419185   | 2.79700000  |
| H | 10.09565754 | 1.09619185   | 3.50600000  |
| C | 6.99265754  | -11.71580815 | 0.91100000  |
| C | 0.22665754  | -7.14480815  | 12.25400000 |
| H | -0.05934246 | -6.47580815  | 11.64200000 |
| C | 1.07465754  | -9.08380815  | 14.04800000 |
| H | 1.36165754  | -9.74580815  | 14.66700000 |
| C | 8.04665754  | -10.84880815 | 0.64000000  |
| H | 8.92565754  | -11.17580815 | 0.49300000  |
| C | 8.99965754  | -1.12580815  | 0.73800000  |
| H | 8.71065754  | -1.67680815  | 0.02000000  |
| C | 10.27965754 | 0.74719185   | 1.52000000  |
| H | 10.88265754 | 1.46219185   | 1.34700000  |
| C | 0.14065754  | -8.14180815  | 14.42400000 |
| H | -0.21234246 | -8.15780815  | 15.30700000 |
| C | 8.07665754  | -15.49580815 | 1.60300000  |
| C | -0.28534246 | -7.18080815  | 13.54100000 |
| H | -0.93134246 | -6.53980815  | 13.81300000 |
| C | 9.86365754  | -0.06280815  | 0.49400000  |
| H | 10.16765754 | 0.10319185   | -0.39100000 |
| C | 9.19265754  | -16.08180815 | 2.15900000  |
| H | 9.61265754  | -15.68780815 | 2.91500000  |
| C | 7.42165754  | -16.10980815 | 0.53500000  |
| H | 6.63465754  | -15.72180815 | 0.17200000  |
| C | 9.70965754  | -17.27380815 | 1.60100000  |
| H | 10.49965754 | -17.66680815 | 1.95500000  |
| C | 7.92565754  | -17.28680815 | 0.00800000  |
| H | 7.48965754  | -17.70480815 | -0.72400000 |
| C | 9.05965754  | -17.85080815 | 0.55000000  |

## 10. References

- [1] Dolomanov, O. V.; Bourhis, L. J.; Gildea, R. J.; Howard, J. A. K.; Puschmann, H. **OLEX2**: a complete structure solution, refinement and analysis program. *J. Appl. Crystallogr.*, **2009**, *42*, 339-341.
- [2] Yan Z., Donald G. T., Density Functional for Spectroscopy: No Long-Range Self-Interaction Error, Good Performance for Rydberg and Charge-Transfer States, and Better Performance on Average than **B3LYP** for Ground States, *J. Phys. Chem. A*, **2006**, *110*, 13126–13130.
- [3] Stefan G., Stephan E., Lars G., Effect of the damping function in dispersion corrected density functional theory. *J. Comp. Chem.*, *32*, **2011**, 1456-1465.
- [4] Du, X.-S.; Zhang, D.-W.; Guo, Y.; Li, J.; Han, Y.; Chen, C.-F. Towards the Highly Efficient Synthesis and Selective Methylation of C(sp<sup>3</sup>)-Bridged [6] Cycloparaphenylenes from Fluorene[3]arenes. *Angew. Chem. Int. Edit.*, **2021**, *60*, 13021-13028.
- [5] H. Li, Z. Li, C. Lin, J. Jiang and L. Wang, Precise recognition of benzonitrile derivatives with supramolecular macrocycle of phosphorylated cavitand by co-crystallization method, *Nat. Commun.*, 2024, **15**, 5315.
- [6] Krupp, F.; Frey, W.; Richert, C. Absolute Configuration of Small Molecules by Co-Crystallization. *Angew. Chem. Int. Edit.*, **2020**, *59*, 15875-15879.
